# Supplementary material for: Molecular architecture of primate specific neural circuit formation
Source: Research Square preprint supplement (doi:10.21203/rs.3.rs-4082064/v1), 2024-03-22
Supplement: Supplementary file 1 [file 2124a36fd585b180548f3061.xlsx]

## Sheet: Sheet1
L1	L2	L3	L4	L5	L6
NDNF	PCDH8	OCM2	RORB	FEZF2	TLE4
SLC13A4	CALB2	TAFA1	PLCH1	MKX	CPLX3
RELN	CUX2	CUX2	LOC108589028	ETV1	RASGRP1
NR2F2	CRH	CPNE8	SCRG1	HS3ST2	B3GALT2
IGF2	LOC100396938	CBLN4	HTR2A	TOX	NXPH3
CCL24	SEZ6L	PTPRF	UST	SULF2	TBR1
WIF1	MN1	SLC29A4		KCNAB1	NR4A2
CXCL14	PTK2B	LNX1		PCP4L1	GRIK3
DCN	RBP4	NECTIN3		FAM43B	SYT6
COL1A2	SOWAHA			CXXC4	NEUROD6
ADARB2	YJEFN3			CYP26B1	SEMA3E
APOD	TMEM158			CD24	LRRC55
RARRES2	HPCAL1			RAB26	BID
	VIP			GABRA5
	LIMCH1			VAT1L
	SLC29A4			NTNG2
	LOC118151478			IPCEF1
	PREX1			ELAVL2
				NEUROD6
				CRIM1
				EFHD2
