# Supplementary material for: Molecular architecture of primate specific neural circuit formation
Source: Research Square preprint supplement (doi:10.21203/rs.3.rs-4082064/v1), 2024-03-22
Supplement: Supplementary file 2 [file 68abc290b0d500823436fdaf.xlsx]

## Sheet: Sample summary
Sample ID	age	sex	RIKEN animal ID	area	subregion for analysis	Permeabilization	cDNA			Index PCR		Library		Space Ranger
						min	cycle number	ng/uL	instrument	Input cDNA	cycle number	ng/uL	instrument	Mean Reads per Spot	Median Genes per Spot	Median UMI Counts per Spot	Exonic mapping (%)	Intronic mapping (%)
3989	P16	male	CM-2658M	AuA1		18	16	17.3	TapeStation	173	15	25.8	TapeStation	116296	3193	6099	77.9	2.1
3688	1 month	male	CM-2595M	AuA1		18	16	27.2	Tapestation	272	15	27.2	Tapestation	76793	3524	7611	77.9	2
3705	1 month	female	CM-2619F	AuA1		18	15	22.6	Tapestation	394	14	26	Tapestation	76364	4729	12603	73	2.2
3749	3 month	female	CM-2578F	AuA1		12	17	18	Tapestation	123	15	17	Tapestation	93827	1718	2906	76.5	1.5
3786	3 month	male	CM-2559M	AuA1		12	16	23.6	Tapestation	236	14	21.2	Tapestation	73380	2320	4508	75.3	1.9
3808	6 month	female	CM-2450F	AuA1		18	16	24.6	Tapestation	246	14	15.1	Tapestation	100641	3490	8206	76.5	1.9
3819	6 month	male	CM-2478M	AuA1		18	15	12.7	Tapestation	127	15	27.8	TapeStation	100775	2924	5914	76.6	1.9
4102	P16	male	CM-2658M	A3		18	14	11.5	TapeStation	115	15	25.8	TapeStation	74882	4926	13033	73.2	3.1
4103	P16	male	CM-2658M	A3		18	14	6.4	TapeStation	64.2	16	45.2	TapeStation	76978	4753	11740	71.2	3.5
3686	1 month	male	CM-2595M	A3		18	15	12.5	Tapestation	125	17	12.5	Tapestation	183451	5694	17066	76.9	2
3701	1 month	female	CM-2619F	A3		18	15	2.8	Tapestation	42	17	28	Tapestation	107822	2514	4750	74.5	2.4
3783	3 month	male	CM-2559M	A3		12	17	15.3	Tapestation	153	15	29.4	Tapestation	82415	2571	5328	76.7	1.9
3788	3 month	female	CM-2578F	A3		12	16	24.2	Tapestation	242	14	19	Tapestation	109997	3696	8563	77.1	1.9
3806	6 month	female	CM-2450F	A3		18	17	16.9	Tapestation	169	15	19.1	Tapestation	148583	2456	4621	78.3	1.9
3820	6 month	male	CM-2478M	A3		18	16	25	Tapestation	250	14	25.6	TapeStation	99760	3495	7581	75	2
4098	P16	male	CM-2658M	Visual Cortex	V1, V2	6	16	23.5	TapeStation	235	14	20	TapeStation	80972	1966	3703	77.2	2.1
4099	P16	male	CM-2658M	Visual Cortex	V1, V2	6	16	14.7	TapeStation	147	15	31	TapeStation	104355	1668	3047	77	2.1
3674	1 month	female	CM-2596F	Visual Cortex	V1	18	17	52	Tapestation	520	17	26.6	Tapestation	96323	3977	8783	75.6	1.9
3675	1 month	female	CM-2596F	Visual Cortex	V1, V2	18	16	16	Tapestation	262	17	31.8	Tapestation	199956	4408	10350	76.1	1.9
3676	1 month	male	CM-2595M	Visual Cortex	V1	18	16	37	Tapestation	370	17	24.8	Tapestation	126956	4489	10648	76.5	1.9
3677	1 month	male	CM-2595M	Visual Cortex	V1, V2	18	17	17	Tapestation	358	17	22.2	Tapestation	168285	4811	12173	75.5	1.9
3707	3 month	male	CM-2559M	Visual Cortex	V1, V2	12	16	17	Tapestation	131	16	21.8	Tapestation	198486	2131	3648	75	2.4
3709	3 month	female	CM-2578F	Visual Cortex	V1, V2	12	16.5	17	Tapestation	177	16	27.2	Tapestation	167981	2914	5630	77.4	2
4114	3 month	male	CM-2671M	Visual Cortex	V1, V2	24	14	16.6	TapeStation	166	15	19.9	TapeStation	107868	5174	14921	74.7	2.6
4115	3 month	male	CM-2671M	Visual Cortex	V1, V2	24	14	14.1	TapeStation	141	15	24.8	TapeStation	87710	5495	16600	74.7	2.5
3867	6 month	male	CM-2478M	Visual Cortex	V1	18	16	38.2	TapeStation	382	14	23	TapeStation	65143	4115	9798	75.4	2.1
3868	6 month	female	CM-2450F	Visual Cortex	V1	18	16	52.9	TapeStation	529	13	21	TapeStation	60650	4606	11872	76.1	2
4116	3 month	male	CM-2671M	Visual Cortex	V2	24	14	11.4	TapeStation	114	15	11.8	TapeStation	108806	5243	15421	74.6	2.6
3869	6 month	female	CM-2450F	Visual Cortex	V2	18	16	42.7	TapeStation	427	13	21.6	TapeStation	60820	4783	12690	75.1	2.1
4423	P16	male	CM-2658M	prefrontal cortex (PFC)	mPFC	18	14	12.7	TapeStation	127	15	21.4	TapeStation	109710	5595	16658	72.4	2.9
4424	P16	male	CM-2658M	prefrontal cortex (PFC)	dPFC, vPFC	18	14	26	TapeStation	259.5	14	19.9	TapeStation	129063	6594	23736	74.9	2.5
4425	P16	male	CM-2658M	prefrontal cortex (PFC)	dPFC, vPFC, mPFC	18	14	21.6	TapeStation	216	14	20.6	TapeStation	91670	6102	19912	75.6	2.4
4238	1 month	male	CM-2595M	prefrontal cortex (PFC)	mPFC, dPFC	18	15	38.2	TapeStation	382	14	21.6	TapeStation	73814	4411	10372	74.6	2.6
4491	1 month	female	CM-2619F	prefrontal cortex (PFC)	dPFC	18	14	9.6	TapeStation	95.5	16	41.4	TapeStation	68526	4492	10996	75.3	2.3
4492	1 month	female	CM-2619F	prefrontal cortex (PFC)	vPFC	18	14	11.8	TapeStation	118	15	30.2	TapeStation	66414	4970	12881	74.8	2.3
4493	1 month	female	CM-2619F	prefrontal cortex (PFC)	dPFC, vPFC, mPFC	18	14	9.5	TapeStation	95	16	36.8	TapeStation	73785	5221	14587	75.8	2.1
4122	3 month	female	CM-2578F	prefrontal cortex (PFC)	mPFC	12	14	16.2	TapeStation	162	15	17.2	TapeStation	116307	5363	16984	77.2	2
4123	3 month	female	CM-2578F	prefrontal cortex (PFC)	dPFC	12	14	17.8	TapeStation	178	15	11.6	TapeStation	104126	5199	15984	77.1	2.1
4124	3 month	female	CM-2578F	prefrontal cortex (PFC)	vPFC	12	14	11.6	TapeStation	116	15	13.6	TapeStation	99406	6286	21153	68.6	2.2
4419	3 month	male	CM-2559M	prefrontal cortex (PFC)	vPFC, dPFC	12	14	29.7	TapeStation	297	14	19.5	TapeStation	120179	6249	21524	76.9	2.1
4420	3 month	male	CM-2559M	prefrontal cortex (PFC)	mPFC	12	14	14.6	TapeStation	145.5	15	20	TapeStation	164810	5865	18499	76.8	2.2
4257	6 month	female	CM-2450F	prefrontal cortex (PFC)	mPFC, dPFC	18	14	14.6	TapeStation	146	15	22.8	TapeStation	102175	5038	13555	72.1	2.7
4258	6 month	female	CM-2450F	prefrontal cortex (PFC)	mPFC	18	15	28.5	TapeStation	285	14	26	TapeStation	76838	4769	12338	71.8	2.9
4260	6 month	male	CM-2478M	prefrontal cortex (PFC)	vPFC	18	15	17.7	TapeStation	177	15	22.2	TapeStation	94564	4346	10630	60.7	4.5
4261	6 month	male	CM-2478M	prefrontal cortex (PFC)	dPFC	18	14	11.3	TapeStation	113.1	15	14.4	TapeStation	103548	4513	11279	65.4	4.2
4262	6 month	male	CM-2478M	prefrontal cortex (PFC)	vPFC	18	14	14.3	TapeStation	142.5	15	24.8	TapeStation	93857	4944	13537	64.7	3.7
4269	1 year	female	CM-2209F	prefrontal cortex (PFC)	dPFC, vPFC, mPFC	18	14	13.3	TapeStation	133	15	16.6	TapeStation	71659	3864	9840	65.4	3.5
														104611	4289.45	11367.6	74.417	2.37234
														34997.6	1273.39	5175.9	3.72109	0.620124

## Sheet: Visium experimental summary
TO	Kit	Slide Kit	Visium Spatial Tissue Optimization Reagent Kit (PN-1000192)
		Reagent Kit	Visium Spatial Tissue Optimization Slide Kit (PN-1000191)
GEX	Kits	Slide Kit	Visium Spatial Gene Expression Slide Kit - 16 rxns (PN-1000185)
		Reagent Kit	Visium Spatial Gene Expression Reagent Kit - 16 rxns (PN-1000186)
		Library Construction Kit	Library Construction Kit 16 rxns (PN-1000190)
		Index	Dual Index Kit TT Set A - 96 rxns (PN-1000215)
	Library	Staining	H&E Staining
		Library QC Instrument	Agilent TapeStation
	Sequencing	Sequencer	Illumina NovaSeq 6000
		Flowcell Type	Novaseq S4 100C
		R1 Sequencing Cycles (cycle)	28
		i7 Index (cycle)	10
		i5 Index (cycle)	10
		R2 Sequencing Cycles (cycle)	90
	Space Ranger	SpaceRanger Version	spaceranger-1.3.1
		Reference Genome	cj1700 (mCalJac4)
