# Supplementary material for: Molecular architecture of primate specific neural circuit formation
Source: Research Square preprint supplement (doi:10.21203/rs.3.rs-4082064/v1), 2024-03-22
Supplement: Supplementary file 3 [file a02639621ffb718019db1c26.xlsx]

## Sheet: V1_P16L4a_vs_V1_P16L4
	Category	ID	Description	p.adjust	Count	geneID	GeneRatio
GO:0065007	GO:BP	GO:0065007	biological regulation	3.28598255814025e-18	188	SEMA7A/EDIL3/HTR2A/MBP/SCN1B/CDK2AP1/CUX1/PLP1/THBS1/ADAM23/KCNS2/CALB1/ABI3BP/GARNL3/TBR1/ESRRG/RIMS3/KCNS1/CACNA2D1/NTNG1/TIAM2/CDH6/PVALB/RIT2/BHLHE40/CNTNAP1/VAV3/RPRM/MAP2K1/MTARC2/ADCYAP1/SERPINE2/LOC100386406/HSPA2/DCAF6/HLF/ARL6IP5/DIXDC1/PCSK1/KALRN/FOS/KCNH7/SETD7/FGFR3/ZNF365/STARD4/EEF1A2/GFAP/ASGR2/UNC13C/SHTN1/TP53BP2/GNAL/FHOD3/DDIT4L/TSC22D4/PLAAT3/SYT2/ARID3B/RCAN1/IGFBP6/SMYD2/P…	188/267
GO:0050789	GO:BP	GO:0050789	regulation of biological process	6.4986571959879e-18	184	SEMA7A/EDIL3/HTR2A/MBP/SCN1B/CDK2AP1/CUX1/PLP1/THBS1/ADAM23/KCNS2/CALB1/ABI3BP/GARNL3/TBR1/ESRRG/KCNS1/CACNA2D1/NTNG1/TIAM2/CDH6/PVALB/RIT2/BHLHE40/CNTNAP1/VAV3/RPRM/MAP2K1/MTARC2/ADCYAP1/SERPINE2/LOC100386406/HSPA2/DCAF6/HLF/ARL6IP5/DIXDC1/KALRN/FOS/KCNH7/SETD7/FGFR3/ZNF365/STARD4/EEF1A2/GFAP/UNC13C/SHTN1/TP53BP2/GNAL/FHOD3/DDIT4L/TSC22D4/PLAAT3/SYT2/ARID3B/RCAN1/IGFBP6/SMYD2/PACSIN1/FHL1/MTURN/…	184/267
GO:0050794	GO:BP	GO:0050794	regulation of cellular process	4.03498653453296e-16	175	SEMA7A/EDIL3/HTR2A/MBP/SCN1B/CDK2AP1/CUX1/PLP1/THBS1/ADAM23/KCNS2/CALB1/ABI3BP/GARNL3/TBR1/ESRRG/KCNS1/CACNA2D1/NTNG1/TIAM2/CDH6/RIT2/BHLHE40/CNTNAP1/VAV3/RPRM/MAP2K1/MTARC2/ADCYAP1/SERPINE2/LOC100386406/HSPA2/DCAF6/HLF/ARL6IP5/DIXDC1/KALRN/FOS/KCNH7/SETD7/FGFR3/ZNF365/STARD4/EEF1A2/GFAP/SHTN1/TP53BP2/GNAL/FHOD3/DDIT4L/TSC22D4/SYT2/ARID3B/RCAN1/IGFBP6/SMYD2/PACSIN1/FHL1/MTURN/PPT1/EDNRB/TRPC3/NTS…	175/267
GO:0048869	GO:BP	GO:0048869	cellular developmental process	4.53926859639746e-14	84	BTBD3/SEMA7A/HTR2A/SCN1B/PLP1/ABI3BP/TBR1/NTNG1/SEMA5B/RIT2/CNTNAP1/ADCYAP1/SERPINE2/PAK6/HSPA2/HLF/DIXDC1/KALRN/FOS/ZNF365/GFAP/CAPN2/ACSL6/SHTN1/FHOD3/PLAAT3/SYT2/RCAN1/PACSIN1/MTURN/EDNRB/ARL4A/CD9/GLO1/ANXA2/CNP/GJA1/NFIB/NDRG2/BRINP3/LHX2/PCGF5/NPTX1/INHBA/PRLH/GPR37L1/FSTL1/SOX4/FAM210B/EFHD1/TUBA8/HTRA1/VIM/CAMK2B/SEMA6D/SEMA3F/CCN2/POU3F2/GNA12/EPAS1/HOPX/ROCK2/KLF13/CNOT2/CPNE5/PTK2B/RAS…	84/267
GO:0030154	GO:BP	GO:0030154	cell differentiation	4.53926859639746e-14	84	BTBD3/SEMA7A/HTR2A/SCN1B/PLP1/ABI3BP/TBR1/NTNG1/SEMA5B/RIT2/CNTNAP1/ADCYAP1/SERPINE2/PAK6/HSPA2/HLF/DIXDC1/KALRN/FOS/ZNF365/GFAP/CAPN2/ACSL6/SHTN1/FHOD3/PLAAT3/SYT2/RCAN1/PACSIN1/MTURN/EDNRB/ARL4A/CD9/GLO1/ANXA2/CNP/GJA1/NFIB/NDRG2/BRINP3/LHX2/PCGF5/NPTX1/INHBA/PRLH/GPR37L1/FSTL1/SOX4/FAM210B/EFHD1/TUBA8/HTRA1/VIM/CAMK2B/SEMA6D/SEMA3F/CCN2/POU3F2/GNA12/EPAS1/HOPX/ROCK2/KLF13/CNOT2/CPNE5/PTK2B/RAS…	84/267
GO:0048731	GO:BP	GO:0048731	system development	3.09768810142668e-12	78	BTBD3/SEMA7A/SCN1B/PLP1/THBS1/CALB1/ABI3BP/TBR1/NTNG1/SEMA5B/RIT2/CNTNAP1/ADCYAP1/SERPINE2/PAK6/LOC100386406/DIXDC1/KALRN/FOS/ZNF365/GFAP/ACSL6/SHTN1/FHOD3/PLAAT3/SYT2/PACSIN1/PPT1/EDNRB/CD9/ANXA2/CNP/CLDN11/GJA1/HPGD/NFIB/NDRG2/IRS2/BRINP3/LHX2/NPTX1/INHBA/PRLH/HSPB1/GPR37L1/SOX4/EFHD1/KCNA2/LUZP1/VIM/CAMK2B/SEMA6D/SEMA3F/CCN2/POU3F2/EPAS1/DIPK2A/ROCK2/CPNE5/PTK2B/RASGRF1/CDK5RAP3/ENG/SLITRK1/AT…	78/267
GO:0007399	GO:BP	GO:0007399	nervous system development	3.86936702188696e-12	57	BTBD3/SEMA7A/SCN1B/PLP1/TBR1/NTNG1/SEMA5B/RIT2/CNTNAP1/ADCYAP1/SERPINE2/PAK6/LOC100386406/DIXDC1/KALRN/FOS/ZNF365/GFAP/ACSL6/SHTN1/SYT2/PACSIN1/PPT1/EDNRB/CD9/ANXA2/CNP/CLDN11/NFIB/NDRG2/IRS2/BRINP3/LHX2/NPTX1/INHBA/PRLH/GPR37L1/SOX4/EFHD1/KCNA2/LUZP1/VIM/CAMK2B/SEMA6D/SEMA3F/POU3F2/CPNE5/PTK2B/RASGRF1/SLITRK1/LRIG1/ADARB1/IL6ST/EMX1/SIPA1L1/BDNF/TWSG1	57/267
GO:0032502	GO:BP	GO:0032502	developmental process	2.89688074301735e-11	103	BTBD3/SEMA7A/HTR2A/MBP/SCN1B/PLP1/THBS1/CALB1/ABI3BP/TBR1/NTNG1/SEMA5B/RIT2/CNTNAP1/ADCYAP1/SERPINE2/PAK6/LOC100386406/HSPA2/HLF/DIXDC1/KALRN/FOS/QKI/ZNF365/GFAP/CAPN2/ACSL6/SHTN1/FHOD3/PLAAT3/SYT2/RCAN1/PACSIN1/FHL1/MTURN/PPT1/EDNRB/ARL4A/CD9/GLO1/ANXA2/CNP/CLDN11/GJA1/HPGD/NFIB/NDRG2/IRS2/BRINP3/LHX2/PCGF5/NPTX1/INHBA/PRLH/HSPB1/GPR37L1/FSTL1/SOX4/FAM210B/EFHD1/TUBA8/KCNA2/HTRA1/LUZP1/VIM/CAMK2…	103/267
GO:0007275	GO:BP	GO:0007275	multicellular organism development	3.80442956491954e-11	85	BTBD3/SEMA7A/MBP/SCN1B/PLP1/THBS1/CALB1/ABI3BP/TBR1/NTNG1/SEMA5B/RIT2/CNTNAP1/ADCYAP1/SERPINE2/PAK6/LOC100386406/DIXDC1/KALRN/FOS/ZNF365/GFAP/CAPN2/ACSL6/SHTN1/FHOD3/PLAAT3/SYT2/PACSIN1/MTURN/PPT1/EDNRB/CD9/ANXA2/CNP/CLDN11/GJA1/HPGD/NFIB/NDRG2/IRS2/BRINP3/LHX2/NPTX1/INHBA/PRLH/HSPB1/GPR37L1/SOX4/FAM210B/EFHD1/KCNA2/LUZP1/VIM/CAMK2B/SEMA6D/SEMA3F/CCN2/POU3F2/GNA12/EPAS1/DIPK2A/ROCK2/KLF13/CNOT2/C…	85/267
GO:0048518	GO:BP	GO:0048518	positive regulation of biological process	8.04728727505725e-11	106	SEMA7A/EDIL3/HTR2A/MBP/SCN1B/CDK2AP1/PLP1/THBS1/CALB1/ABI3BP/TBR1/ESRRG/RIT2/VAV3/MAP2K1/ADCYAP1/SERPINE2/HSPA2/DCAF6/HLF/ARL6IP5/DIXDC1/KALRN/FOS/FGFR3/ZNF365/STARD4/EEF1A2/GFAP/SHTN1/TP53BP2/SYT2/IGFBP6/FHL1/MTURN/PPT1/TRPC3/NTS/IGFBP2/SMARCD1/ANXA2/GATM/PTTG1IP/GJA1/NFIB/IRS2/BRINP3/SLC38A2/S100A13/UTRN/BICD1/LHX2/SEC14L1/PCGF5/INHBA/MORF4L1/HSPB1/GPR37L1/NFIX/SOX4/ELOVL5/FAM210B/CCDC80/EPB41L…	106/267
GO:0022008	GO:BP	GO:0022008	neurogenesis	1.3025290511228e-10	45	BTBD3/SEMA7A/SCN1B/PLP1/TBR1/NTNG1/SEMA5B/RIT2/CNTNAP1/ADCYAP1/SERPINE2/PAK6/DIXDC1/KALRN/ZNF365/GFAP/ACSL6/SHTN1/SYT2/PACSIN1/EDNRB/CD9/ANXA2/CNP/NFIB/BRINP3/LHX2/NPTX1/INHBA/GPR37L1/SOX4/EFHD1/VIM/CAMK2B/SEMA3F/POU3F2/CPNE5/PTK2B/RASGRF1/SLITRK1/ADARB1/IL6ST/EMX1/SIPA1L1/BDNF	45/267
GO:0048522	GO:BP	GO:0048522	positive regulation of cellular process	1.84989321423507e-10	99	SEMA7A/EDIL3/HTR2A/MBP/SCN1B/CDK2AP1/PLP1/THBS1/CALB1/ABI3BP/TBR1/ESRRG/RIT2/VAV3/MAP2K1/ADCYAP1/SERPINE2/HSPA2/DCAF6/HLF/ARL6IP5/DIXDC1/KALRN/FOS/FGFR3/ZNF365/STARD4/EEF1A2/GFAP/SHTN1/TP53BP2/SYT2/IGFBP6/MTURN/PPT1/TRPC3/NTS/IGFBP2/SMARCD1/ANXA2/GJA1/NFIB/IRS2/BRINP3/SLC38A2/S100A13/UTRN/BICD1/LHX2/PCGF5/INHBA/MORF4L1/HSPB1/GPR37L1/NFIX/SOX4/ELOVL5/FAM210B/CCDC80/EPB41L2/LAMC2/VIM/TIMP3/SEMA6D/C…	99/267
GO:0048856	GO:BP	GO:0048856	anatomical structure development	1.9650660688089e-10	97	BTBD3/SEMA7A/MBP/SCN1B/PLP1/THBS1/CALB1/ABI3BP/TBR1/NTNG1/SEMA5B/RIT2/CNTNAP1/ADCYAP1/SERPINE2/PAK6/LOC100386406/HSPA2/HLF/DIXDC1/KALRN/FOS/QKI/ZNF365/GFAP/CAPN2/ACSL6/SHTN1/FHOD3/PLAAT3/SYT2/RCAN1/PACSIN1/FHL1/MTURN/PPT1/EDNRB/CD9/GLO1/ANXA2/CNP/CLDN11/GJA1/HPGD/NFIB/NDRG2/IRS2/BRINP3/LHX2/PCGF5/NPTX1/INHBA/PRLH/HSPB1/GPR37L1/FSTL1/SOX4/FAM210B/EFHD1/TUBA8/KCNA2/HTRA1/LUZP1/VIM/CAMK2B/SEMA6D/SEM…	97/267
GO:0048699	GO:BP	GO:0048699	generation of neurons	2.55043937912696e-10	41	BTBD3/SEMA7A/SCN1B/PLP1/TBR1/NTNG1/SEMA5B/RIT2/CNTNAP1/ADCYAP1/PAK6/DIXDC1/KALRN/ZNF365/GFAP/ACSL6/SHTN1/SYT2/PACSIN1/EDNRB/CNP/NFIB/BRINP3/LHX2/NPTX1/INHBA/GPR37L1/SOX4/EFHD1/VIM/CAMK2B/SEMA3F/POU3F2/CPNE5/PTK2B/RASGRF1/SLITRK1/ADARB1/EMX1/SIPA1L1/BDNF	41/267
GO:0030182	GO:BP	GO:0030182	neuron differentiation	7.24605406165601e-10	39	BTBD3/SEMA7A/SCN1B/PLP1/TBR1/NTNG1/SEMA5B/RIT2/CNTNAP1/ADCYAP1/PAK6/DIXDC1/KALRN/ZNF365/GFAP/SHTN1/SYT2/PACSIN1/EDNRB/CNP/NFIB/BRINP3/LHX2/NPTX1/INHBA/GPR37L1/SOX4/EFHD1/VIM/SEMA3F/POU3F2/CPNE5/PTK2B/RASGRF1/SLITRK1/ADARB1/EMX1/SIPA1L1/BDNF	39/267
GO:0031175	GO:BP	GO:0031175	neuron projection development	8.21546644280287e-10	32	BTBD3/SEMA7A/SCN1B/PLP1/TBR1/NTNG1/SEMA5B/RIT2/CNTNAP1/ADCYAP1/PAK6/KALRN/ZNF365/GFAP/SHTN1/SYT2/CNP/NFIB/LHX2/NPTX1/EFHD1/VIM/SEMA3F/POU3F2/CPNE5/PTK2B/RASGRF1/SLITRK1/ADARB1/EMX1/SIPA1L1/BDNF	32/267
GO:0032501	GO:BP	GO:0032501	multicellular organismal process	2.01479987196619e-09	111	BTBD3/SEMA7A/MBP/SCN1B/PLP1/THBS1/CALB1/ABI3BP/TBR1/ESRRG/CACNA2D1/NTNG1/USH1C/SEMA5B/RIT2/CNTNAP1/VAV3/ADCYAP1/SERPINE2/PAK6/LOC100386406/HSPA2/ARL6IP5/DIXDC1/KALRN/FOS/ZNF365/GFAP/CAPN2/ACSL6/SHTN1/FHOD3/PLAAT3/SYT2/RCAN1/PACSIN1/MTURN/PPT1/EDNRB/TRPC3/CD9/IGFBP2/ANXA2/GATM/CNP/CLDN11/GJA1/HPGD/NFIB/NDRG2/IRS2/BRINP3/TUSC3/S100A13/LHX2/PCGF5/NPTX1/INHBA/SCN2B/PRLH/HSPB1/GPR37L1/FSTL1/SOX4/CHMP2…	111/267
GO:0048666	GO:BP	GO:0048666	neuron development	3.37447426049945e-09	34	BTBD3/SEMA7A/SCN1B/PLP1/TBR1/NTNG1/SEMA5B/RIT2/CNTNAP1/ADCYAP1/PAK6/KALRN/ZNF365/GFAP/SHTN1/SYT2/PACSIN1/EDNRB/CNP/NFIB/LHX2/NPTX1/EFHD1/VIM/SEMA3F/POU3F2/CPNE5/PTK2B/RASGRF1/SLITRK1/ADARB1/EMX1/SIPA1L1/BDNF	34/267
GO:0048468	GO:BP	GO:0048468	cell development	5.40906068787739e-09	58	BTBD3/SEMA7A/SCN1B/PLP1/TBR1/NTNG1/SEMA5B/RIT2/CNTNAP1/ADCYAP1/SERPINE2/PAK6/HSPA2/KALRN/FOS/ZNF365/GFAP/SHTN1/FHOD3/SYT2/RCAN1/PACSIN1/MTURN/EDNRB/GLO1/ANXA2/CNP/NFIB/LHX2/PCGF5/NPTX1/INHBA/GPR37L1/SOX4/FAM210B/EFHD1/TUBA8/VIM/SEMA3F/POU3F2/EPAS1/ROCK2/KLF13/CPNE5/PTK2B/RASGRF1/CDK5RAP3/ENG/SLITRK1/EBP/ADARB1/IL6ST/EMX1/SIPA1L1/NRARP/BDNF/TWSG1/CLDN5	58/267
GO:0008283	GO:BP	GO:0008283	cell population proliferation	2.16662647011643e-08	63	BTBD3/SEMA7A/SCN1B/PLP1/THBS1/ABI3BP/TBR1/NTNG1/SEMA5B/RIT2/CNTNAP1/VAV3/MAP2K1/ADCYAP1/SERPINE2/PAK6/DIXDC1/KALRN/FGFR3/ZNF365/GFAP/ACSL6/SHTN1/SYT2/SMYD2/CD9/IGFBP2/CNP/GJA1/NFIB/NDRG2/IRS2/LHX2/NPTX1/INHBA/GPR37L1/SOX4/EFHD1/LAMC2/VIM/TBRG1/SEMA3F/CCN2/IER5/POU3F2/DIPK2A/SCRG1/KLF13/CPNE5/PTK2B/RASGRF1/CDK5RAP3/GNAI2/SLITRK1/CADM4/ADARB1/IL6ST/EMX1/SIPA1L1/NRARP/BDNF/TWSG1/CLDN5	63/267
GO:0048812	GO:BP	GO:0048812	neuron projection morphogenesis	2.70000884442851e-08	24	BTBD3/SEMA7A/SCN1B/TBR1/NTNG1/SEMA5B/CNTNAP1/PAK6/KALRN/ZNF365/SHTN1/SYT2/CNP/NFIB/LHX2/NPTX1/SEMA3F/POU3F2/CPNE5/SLITRK1/ADARB1/EMX1/SIPA1L1/BDNF	24/267
GO:0120039	GO:BP	GO:0120039	plasma membrane bounded cell projection morphogenesis	6.04760948848729e-08	24	BTBD3/SEMA7A/SCN1B/TBR1/NTNG1/SEMA5B/CNTNAP1/PAK6/KALRN/ZNF365/SHTN1/SYT2/CNP/NFIB/LHX2/NPTX1/SEMA3F/POU3F2/CPNE5/SLITRK1/ADARB1/EMX1/SIPA1L1/BDNF	24/267
GO:0048858	GO:BP	GO:0048858	cell projection morphogenesis	6.76514170161154e-08	24	BTBD3/SEMA7A/SCN1B/TBR1/NTNG1/SEMA5B/CNTNAP1/PAK6/KALRN/ZNF365/SHTN1/SYT2/CNP/NFIB/LHX2/NPTX1/SEMA3F/POU3F2/CPNE5/SLITRK1/ADARB1/EMX1/SIPA1L1/BDNF	24/267
GO:0032989	GO:BP	GO:0032989	cellular component morphogenesis	1.05667423286677e-07	26	BTBD3/SEMA7A/SCN1B/TBR1/NTNG1/SEMA5B/CNTNAP1/PAK6/KALRN/ZNF365/SHTN1/FHOD3/SYT2/CD9/CNP/NFIB/LHX2/NPTX1/SEMA3F/POU3F2/CPNE5/SLITRK1/ADARB1/EMX1/SIPA1L1/BDNF	26/267
GO:0032990	GO:BP	GO:0032990	cell part morphogenesis	1.89332036119094e-07	24	BTBD3/SEMA7A/SCN1B/TBR1/NTNG1/SEMA5B/CNTNAP1/PAK6/KALRN/ZNF365/SHTN1/SYT2/CNP/NFIB/LHX2/NPTX1/SEMA3F/POU3F2/CPNE5/SLITRK1/ADARB1/EMX1/SIPA1L1/BDNF	24/267
GO:0051239	GO:BP	GO:0051239	regulation of multicellular organismal process	2.99869113271156e-07	58	SEMA7A/MBP/SCN1B/THBS1/ABI3BP/ESRRG/CACNA2D1/VAV3/ADCYAP1/SERPINE2/KALRN/FOS/ZNF365/GFAP/MTURN/EDNRB/TRPC3/CD9/IGFBP2/ANXA2/GATM/GJA1/NFIB/NDRG2/IRS2/S100A13/LHX2/NPTX1/INHBA/SCN2B/PRLH/HSPB1/GPR37L1/SOX4/S100A1/FAM210B/KCNA2/SEMA3F/CCN2/POU3F2/EPAS1/ROCK2/KLF13/CNOT2/PTK2B/ENG/SLITRK1/ATP2B4/STMP1/IL6ST/ANXA6/SLC7A5/NRARP/BDNF/TWSG1/CLDN5/RGS2/MRTFB	58/267
GO:0023052	GO:BP	GO:0023052	signaling	1.53675694221878e-06	97	SEMA7A/HTR2A/MBP/SCN1B/THBS1/ADAM23/CALB1/GARNL3/ESRRG/CACNA2D1/NTNG1/TIAM2/CDH6/PVALB/RIT2/VAV3/MAP2K1/ADCYAP1/SERPINE2/ARL6IP5/DIXDC1/KALRN/FOS/FGFR3/GFAP/UNC13C/TP53BP2/GNAL/DDIT4L/RCAN1/IGFBP6/SMYD2/MTURN/PPT1/EDNRB/NTS/ANXA2/PTTG1IP/GJA1/HPGD/NDRG2/IRS2/PLPP1/PDYN/S100A13/SEC14L1/NPTX1/INHBA/PRLH/HSPB1/GPR37L1/SOX4/CADPS2/KCNA2/HTRA1/VIM/TIMP3/SEMA3F/CCN2/SLC2A8/GNA12/TLK1/MAGI2/CIT/RGMB/MIN…	97/267
GO:0030001	GO:BP	GO:0030001	metal ion transport	1.9705879558949e-06	29	HTR2A/SCN1B/KCNS2/KCNS1/CACNA2D1/SLC24A2/TRPM3/KCNQ5/SERPINE2/LOC100386406/HSPA2/KCNH7/FHL1/EDNRB/TRPC3/TUSC3/ABCC8/KCNJ3/SCN2B/NIPAL2/KCNK12/KCNA2/KCNC2/KCNC1/PTK2B/ATP2B4/NALCN/CD63/ANXA6	29/267
GO:0007154	GO:BP	GO:0007154	cell communication	1.98575046014758e-06	98	SEMA7A/HTR2A/MBP/SCN1B/THBS1/ADAM23/CALB1/GARNL3/ESRRG/CACNA2D1/NTNG1/TIAM2/CDH6/PVALB/RIT2/CNTNAP1/VAV3/MAP2K1/ADCYAP1/SERPINE2/LOC100386406/ARL6IP5/DIXDC1/KALRN/FOS/FGFR3/GFAP/UNC13C/TP53BP2/GNAL/DDIT4L/RCAN1/IGFBP6/SMYD2/MTURN/PPT1/EDNRB/NTS/PTTG1IP/GJA1/HPGD/NDRG2/IRS2/PLPP1/PDYN/S100A13/SEC14L1/NPTX1/INHBA/PRLH/HSPB1/GPR37L1/SOX4/CADPS2/KCNA2/HTRA1/VIM/TIMP3/SEMA3F/CCN2/SLC2A8/GNA12/TLK1/MAG…	98/267
GO:0050896	GO:BP	GO:0050896	response to stimulus	4.48339901540776e-06	120	SEMA7A/HTR2A/MBP/PLP1/THBS1/ADAM23/PAM/CALB1/ABI3BP/GARNL3/TBR1/ESRRG/CACNA2D1/TIAM2/CDH6/SEMA5B/RIT2/BHLHE40/VAV3/MAP2K1/ADCYAP1/SERPINE2/LOC100386406/HSPA2/ARL6IP5/DIXDC1/FOS/SETD7/FGFR3/ZNF365/GFAP/CAPN2/TP53BP2/GNAL/DDIT4L/LOC100894903/PLAAT3/RCAN1/IGFBP6/SMYD2/MTURN/EDNRB/TRPC3/NTS/CD9/S100A16/ANXA2/GATM/PTTG1IP/CNP/GJA1/HPGD/NFIB/NDRG2/IRS2/PLPP1/BRINP3/SLC38A2/PDYN/S100A13/SEC14L1/NPTX1/IN…	120/267
GO:0034762	GO:BP	GO:0034762	regulation of transmembrane transport	4.77378698571516e-06	21	SCN1B/THBS1/KCNS2/KCNS1/CACNA2D1/LOC100386406/HSPA2/ARL6IP5/KCNH7/FHL1/TRPC3/IRS2/KCNJ3/SCN2B/KCNK12/KCNA2/KCNC2/KCNC1/PTK2B/RASGRF1/CD63	21/267
GO:0042127	GO:BP	GO:0042127	regulation of cell population proliferation	5.79714461498495e-06	44	SEMA7A/SCN1B/THBS1/ABI3BP/TBR1/NTNG1/RIT2/VAV3/MAP2K1/SERPINE2/KALRN/FGFR3/ZNF365/GFAP/SMYD2/CD9/IGFBP2/GJA1/NFIB/NDRG2/IRS2/LHX2/INHBA/GPR37L1/SOX4/LAMC2/VIM/TBRG1/SEMA3F/IER5/POU3F2/KLF13/PTK2B/GNAI2/SLITRK1/CADM4/ADARB1/IL6ST/EMX1/SIPA1L1/NRARP/BDNF/TWSG1/CLDN5	44/267
GO:0009653	GO:BP	GO:0009653	anatomical structure morphogenesis	8.65473737922955e-06	52	BTBD3/SEMA7A/MBP/SCN1B/THBS1/CALB1/TBR1/NTNG1/SEMA5B/CNTNAP1/SERPINE2/PAK6/KALRN/ZNF365/CAPN2/SHTN1/FHOD3/SYT2/CD9/ANXA2/CNP/GJA1/HPGD/NFIB/LHX2/NPTX1/INHBA/HSPB1/SOX4/KCNA2/LUZP1/SEMA3F/CCN2/POU3F2/GNA12/EPAS1/ROCK2/CNOT2/CPNE5/PTK2B/ENG/SLITRK1/ATP2B4/LRIG1/ADARB1/EMX1/SIPA1L1/NRARP/BDNF/EFNA5/TWSG1/CLDN5	52/267
GO:0000902	GO:BP	GO:0000902	cell morphogenesis	9.29225371471233e-06	27	BTBD3/SEMA7A/SCN1B/TBR1/NTNG1/SEMA5B/CNTNAP1/PAK6/KALRN/ZNF365/SHTN1/SYT2/CNP/NFIB/LHX2/NPTX1/SEMA3F/POU3F2/GNA12/CPNE5/PTK2B/SLITRK1/ADARB1/EMX1/SIPA1L1/BDNF/EFNA5	27/267
GO:0055085	GO:BP	GO:0055085	transmembrane transport	1.13140893096367e-05	41	HTR2A/SCN1B/THBS1/KCNS2/KCNS1/CACNA2D1/SLC24A2/TRPM3/KCNQ5/LOC100386406/HSPA2/ARL6IP5/KCNH7/GFAP/SFXN5/FHL1/EDNRB/TRPC3/GJA1/IRS2/SLC38A2/TUSC3/SLC35F4/ABCC8/KCNJ3/SCN2B/NIPAL2/KCNK12/KCNA2/SLC2A8/SLC44A2/KCNC2/KCNC1/PTK2B/RASGRF1/ATP2B4/NALCN/CD63/ANXA6/SLC7A5/CLCN2	41/267
GO:0007417	GO:BP	GO:0007417	central nervous system development	1.3231183847008e-05	27	BTBD3/SEMA7A/SCN1B/PLP1/TBR1/CNTNAP1/SERPINE2/DIXDC1/ZNF365/GFAP/PPT1/CNP/NFIB/IRS2/BRINP3/LHX2/INHBA/GPR37L1/SOX4/VIM/SEMA6D/SEMA3F/POU3F2/ADARB1/IL6ST/EMX1/TWSG1	27/267
GO:0034220	GO:BP	GO:0034220	monoatomic ion transmembrane transport	2.04430710144e-05	31	HTR2A/SCN1B/KCNS2/KCNS1/CACNA2D1/SLC24A2/TRPM3/KCNQ5/LOC100386406/HSPA2/KCNH7/SFXN5/FHL1/EDNRB/TRPC3/GJA1/TUSC3/ABCC8/KCNJ3/SCN2B/NIPAL2/KCNK12/KCNA2/KCNC2/KCNC1/PTK2B/ATP2B4/NALCN/CD63/ANXA6/CLCN2	31/267
GO:0098662	GO:BP	GO:0098662	inorganic cation transmembrane transport	2.29167468864642e-05	27	HTR2A/SCN1B/KCNS2/KCNS1/CACNA2D1/SLC24A2/TRPM3/KCNQ5/LOC100386406/HSPA2/KCNH7/FHL1/EDNRB/TRPC3/TUSC3/ABCC8/KCNJ3/SCN2B/NIPAL2/KCNK12/KCNA2/KCNC2/KCNC1/PTK2B/ATP2B4/NALCN/CD63	27/267
GO:0098655	GO:BP	GO:0098655	monoatomic cation transmembrane transport	3.89468870516137e-05	27	HTR2A/SCN1B/KCNS2/KCNS1/CACNA2D1/SLC24A2/TRPM3/KCNQ5/LOC100386406/HSPA2/KCNH7/FHL1/EDNRB/TRPC3/TUSC3/ABCC8/KCNJ3/SCN2B/NIPAL2/KCNK12/KCNA2/KCNC2/KCNC1/PTK2B/ATP2B4/NALCN/CD63	27/267
GO:0050793	GO:BP	GO:0050793	regulation of developmental process	4.6924983850312e-05	47	SEMA7A/HTR2A/THBS1/ABI3BP/NTNG1/CNTNAP1/SERPINE2/DIXDC1/KALRN/FOS/ZNF365/GFAP/PLAAT3/SYT2/MTURN/EDNRB/ANXA2/GJA1/NFIB/BRINP3/LHX2/INHBA/PRLH/HSPB1/GPR37L1/SOX4/FAM210B/SEMA3F/CCN2/POU3F2/GNA12/ROCK2/KLF13/CNOT2/CPNE5/PTK2B/ENG/SLITRK1/ATP2B4/IL6ST/SIPA1L1/NRARP/BDNF/EFNA5/TWSG1/CLDN5/MRTFB	47/267
GO:0048667	GO:BP	GO:0048667	cell morphogenesis involved in neuron differentiation	4.88692396964377e-05	19	BTBD3/SEMA7A/SCN1B/TBR1/NTNG1/SEMA5B/CNTNAP1/KALRN/ZNF365/CNP/NFIB/LHX2/NPTX1/SEMA3F/POU3F2/SLITRK1/ADARB1/SIPA1L1/BDNF	19/267
GO:0010001	GO:BP	GO:0010001	glial cell differentiation	5.03360118999898e-05	13	PLP1/CNTNAP1/SERPINE2/ZNF365/GFAP/CNP/NFIB/GPR37L1/SOX4/VIM/POU3F2/IL6ST/EMX1	13/267
GO:0006813	GO:BP	GO:0006813	potassium ion transport	5.44483502311812e-05	14	KCNS2/KCNS1/SLC24A2/KCNQ5/KCNH7/FHL1/ABCC8/KCNJ3/KCNK12/KCNA2/KCNC2/KCNC1/PTK2B/CD63	14/267
GO:0061564	GO:BP	GO:0061564	axon development	8.08621450427896e-05	17	SEMA7A/SCN1B/PLP1/TBR1/NTNG1/SEMA5B/CNTNAP1/CNP/NFIB/LHX2/NPTX1/SEMA3F/POU3F2/SLITRK1/ADARB1/SIPA1L1/BDNF	17/267
GO:0034765	GO:BP	GO:0034765	regulation of monoatomic ion transmembrane transport	8.53128393604134e-05	17	SCN1B/KCNS2/KCNS1/CACNA2D1/LOC100386406/HSPA2/KCNH7/FHL1/TRPC3/KCNJ3/SCN2B/KCNK12/KCNA2/KCNC2/KCNC1/PTK2B/CD63	17/267
GO:0060284	GO:BP	GO:0060284	regulation of cell development	8.82492109542531e-05	23	SEMA7A/SERPINE2/KALRN/FOS/ZNF365/GFAP/MTURN/EDNRB/ANXA2/LHX2/INHBA/GPR37L1/SOX4/FAM210B/SEMA3F/ROCK2/KLF13/PTK2B/SLITRK1/IL6ST/NRARP/BDNF/CLDN5	23/267
GO:0098660	GO:BP	GO:0098660	inorganic ion transmembrane transport	0.000109835	28	HTR2A/SCN1B/KCNS2/KCNS1/CACNA2D1/SLC24A2/TRPM3/KCNQ5/LOC100386406/HSPA2/KCNH7/FHL1/EDNRB/TRPC3/TUSC3/ABCC8/KCNJ3/SCN2B/NIPAL2/KCNK12/KCNA2/KCNC2/KCNC1/PTK2B/ATP2B4/NALCN/CD63/CLCN2	28/267
GO:0032879	GO:BP	GO:0032879	regulation of localization	0.000130925	41	HTR2A/SCN1B/THBS1/KCNS2/KCNS1/CACNA2D1/RIT2/ADCYAP1/SERPINE2/LOC100386406/HSPA2/ARL6IP5/KALRN/KCNH7/GFAP/PACSIN1/FHL1/PPT1/TRPC3/ANXA2/GJA1/LGI3/IRS2/BICD1/INHBA/KCNJ3/SCN2B/SOX4/KCNK12/EPB41L2/KCNA2/KCNC2/MAGI2/ROCK2/KCNC1/PTK2B/RASGRF1/CDK5RAP3/ATP2B4/CD63/TP53INP2	41/267
GO:0006812	GO:BP	GO:0006812	monoatomic cation transport	0.000138215	29	HTR2A/SCN1B/KCNS2/KCNS1/CACNA2D1/SLC24A2/TRPM3/KCNQ5/SERPINE2/LOC100386406/HSPA2/KCNH7/FHL1/EDNRB/TRPC3/TUSC3/ABCC8/KCNJ3/SCN2B/NIPAL2/KCNK12/KCNA2/KCNC2/KCNC1/PTK2B/ATP2B4/NALCN/CD63/ANXA6	29/267
GO:0071805	GO:BP	GO:0071805	potassium ion transmembrane transport	0.000139771	13	KCNS2/KCNS1/SLC24A2/KCNQ5/KCNH7/FHL1/ABCC8/KCNJ3/KCNK12/KCNA2/KCNC2/KCNC1/CD63	13/267
GO:0007409	GO:BP	GO:0007409	axonogenesis	0.000145264	16	SEMA7A/SCN1B/TBR1/NTNG1/SEMA5B/CNTNAP1/CNP/NFIB/LHX2/NPTX1/SEMA3F/POU3F2/SLITRK1/ADARB1/SIPA1L1/BDNF	16/267
GO:0065009	GO:BP	GO:0065009	regulation of molecular function	0.000160531	45	HTR2A/MBP/SCN1B/THBS1/KCNS2/KCNS1/TIAM2/BHLHE40/VAV3/MAP2K1/ADCYAP1/SERPINE2/HSPA2/ARL6IP5/KALRN/FGFR3/EEF1A2/RCAN1/FHL1/MTURN/PPT1/NTS/ANXA2/IRS2/LHX2/NPTX1/SCN2B/TIMP3/GNA12/DIPK2A/SPTSSB/MAGI2/ROCK2/PTK2B/RASGRF1/CDK5RAP3/HMBOX1/ATP2B4/ASPH/ADARB1/SIPA1L1/BDNF/EFNA5/CLDN5/RGS2	45/267
GO:0010975	GO:BP	GO:0010975	regulation of neuron projection development	0.000192814	15	SEMA7A/SCN1B/TBR1/NTNG1/RIT2/KALRN/ZNF365/GFAP/VIM/SEMA3F/POU3F2/PTK2B/SLITRK1/SIPA1L1/BDNF	15/267
GO:0006811	GO:BP	GO:0006811	monoatomic ion transport	0.000371744	32	HTR2A/SCN1B/KCNS2/KCNS1/CACNA2D1/SLC24A2/TRPM3/KCNQ5/SERPINE2/LOC100386406/HSPA2/KCNH7/SFXN5/FHL1/EDNRB/TRPC3/GJA1/TUSC3/ABCC8/KCNJ3/SCN2B/NIPAL2/KCNK12/KCNA2/KCNC2/KCNC1/PTK2B/ATP2B4/NALCN/CD63/ANXA6/CLCN2	32/267
GO:0042063	GO:BP	GO:0042063	gliogenesis	0.000375956	14	PLP1/CNTNAP1/SERPINE2/ZNF365/GFAP/CD9/CNP/NFIB/GPR37L1/SOX4/VIM/POU3F2/IL6ST/EMX1	14/267
GO:0031325	GO:BP	GO:0031325	positive regulation of cellular metabolic process	0.000438383	58	SEMA7A/HTR2A/MBP/CDK2AP1/PLP1/THBS1/TBR1/ESRRG/RIT2/MAP2K1/ADCYAP1/HSPA2/DCAF6/HLF/FOS/FGFR3/STARD4/EEF1A2/NTS/SMARCD1/ANXA2/GJA1/NFIB/IRS2/SLC38A2/S100A13/LHX2/PCGF5/INHBA/MORF4L1/NFIX/SOX4/ELOVL5/VIM/IER5/POU3F2/GNA12/EPAS1/DIPK2A/MAGI2/RGMB/ROCK2/KLF13/PXYLP1/PTK2B/CDK5RAP3/APBB2/ENG/HMBOX1/ATP2B4/STMP1/TP53INP2/IL6ST/RNF10/SLC7A5/CLDN5/RARRES2/MRTFB	58/267
GO:0043269	GO:BP	GO:0043269	regulation of monoatomic ion transport	0.000517578	18	SCN1B/KCNS2/KCNS1/CACNA2D1/SERPINE2/LOC100386406/HSPA2/KCNH7/FHL1/TRPC3/KCNJ3/SCN2B/KCNK12/KCNA2/KCNC2/KCNC1/PTK2B/CD63	18/267
GO:0120036	GO:BP	GO:0120036	plasma membrane bounded cell projection organization	0.000591475	32	BTBD3/SEMA7A/SCN1B/PLP1/TBR1/NTNG1/SEMA5B/RIT2/CNTNAP1/ADCYAP1/PAK6/KALRN/ZNF365/GFAP/SHTN1/SYT2/CNP/NFIB/LHX2/NPTX1/EFHD1/VIM/SEMA3F/POU3F2/CPNE5/PTK2B/RASGRF1/SLITRK1/ADARB1/EMX1/SIPA1L1/BDNF	32/267
GO:0009893	GO:BP	GO:0009893	positive regulation of metabolic process	0.00059956	62	SEMA7A/HTR2A/MBP/CDK2AP1/PLP1/THBS1/TBR1/ESRRG/RIT2/MAP2K1/ADCYAP1/HSPA2/DCAF6/HLF/ARL6IP5/FOS/FGFR3/STARD4/EEF1A2/NTS/SMARCD1/ANXA2/GATM/PTTG1IP/GJA1/NFIB/IRS2/SLC38A2/S100A13/LHX2/PCGF5/INHBA/MORF4L1/NFIX/SOX4/ELOVL5/VIM/IER5/POU3F2/GNA12/EPAS1/DIPK2A/MAGI2/RGMB/ROCK2/KLF13/PXYLP1/PTK2B/CDK5RAP3/APBB2/ENG/HMBOX1/ATP2B4/STMP1/TP53INP2/ASPH/IL6ST/RNF10/SLC7A5/CLDN5/RARRES2/MRTFB	62/267
GO:0051049	GO:BP	GO:0051049	regulation of transport	0.000753165	34	SCN1B/THBS1/KCNS2/KCNS1/CACNA2D1/RIT2/SERPINE2/LOC100386406/HSPA2/ARL6IP5/KALRN/KCNH7/GFAP/PACSIN1/FHL1/PPT1/TRPC3/ANXA2/GJA1/LGI3/IRS2/BICD1/INHBA/KCNJ3/SCN2B/SOX4/KCNK12/KCNA2/KCNC2/MAGI2/KCNC1/PTK2B/RASGRF1/CD63	34/267
GO:0030030	GO:BP	GO:0030030	cell projection organization	0.000830048	32	BTBD3/SEMA7A/SCN1B/PLP1/TBR1/NTNG1/SEMA5B/RIT2/CNTNAP1/ADCYAP1/PAK6/KALRN/ZNF365/GFAP/SHTN1/SYT2/CNP/NFIB/LHX2/NPTX1/EFHD1/VIM/SEMA3F/POU3F2/CPNE5/PTK2B/RASGRF1/SLITRK1/ADARB1/EMX1/SIPA1L1/BDNF	32/267
GO:0045595	GO:BP	GO:0045595	regulation of cell differentiation	0.000848774	32	SEMA7A/HTR2A/ABI3BP/SERPINE2/DIXDC1/KALRN/FOS/ZNF365/GFAP/MTURN/EDNRB/ANXA2/GJA1/BRINP3/LHX2/INHBA/GPR37L1/SOX4/FAM210B/SEMA3F/CCN2/POU3F2/ROCK2/KLF13/PTK2B/ENG/SLITRK1/IL6ST/NRARP/BDNF/TWSG1/CLDN5	32/267
GO:1902531	GO:BP	GO:1902531	regulation of intracellular signal transduction	0.000891923	34	SEMA7A/HTR2A/THBS1/GARNL3/RIT2/MAP2K1/ADCYAP1/ARL6IP5/FGFR3/RCAN1/IGFBP6/SMYD2/MTURN/NTS/PTTG1IP/NDRG2/S100A13/GPR37L1/SOX4/TIMP3/CCN2/GNA12/MAGI2/CIT/MINK1/PTK2B/RASGRF1/CDK5RAP3/ENG/ATP2B4/CADM4/SIPA1L1/PHLPP1/RGS2	34/267
GO:0023051	GO:BP	GO:0023051	regulation of signaling	0.0011046	55	SEMA7A/HTR2A/THBS1/CALB1/GARNL3/NTNG1/RIT2/MAP2K1/ADCYAP1/SERPINE2/ARL6IP5/DIXDC1/KALRN/FGFR3/GFAP/DDIT4L/RCAN1/IGFBP6/SMYD2/MTURN/NTS/ANXA2/PTTG1IP/GJA1/NDRG2/IRS2/S100A13/SEC14L1/NPTX1/INHBA/GPR37L1/SOX4/HTRA1/TIMP3/CCN2/GNA12/MAGI2/CIT/MINK1/CNOT2/PTK2B/RASGRF1/CDK5RAP3/DGKB/ENG/ATP2B4/STMP1/CD63/CADM4/IL6ST/SIPA1L1/NRARP/PHLPP1/TWSG1/RGS2	55/267
GO:0010604	GO:BP	GO:0010604	positive regulation of macromolecule metabolic process	0.00113094	58	SEMA7A/HTR2A/MBP/CDK2AP1/PLP1/THBS1/TBR1/ESRRG/RIT2/MAP2K1/ADCYAP1/HSPA2/DCAF6/HLF/ARL6IP5/FOS/FGFR3/NTS/SMARCD1/ANXA2/PTTG1IP/GJA1/NFIB/IRS2/SLC38A2/S100A13/LHX2/PCGF5/INHBA/MORF4L1/NFIX/SOX4/VIM/IER5/POU3F2/GNA12/EPAS1/DIPK2A/MAGI2/RGMB/ROCK2/KLF13/PXYLP1/PTK2B/CDK5RAP3/APBB2/ENG/HMBOX1/ATP2B4/STMP1/TP53INP2/ASPH/IL6ST/RNF10/SLC7A5/CLDN5/RARRES2/MRTFB	58/267
GO:0051336	GO:BP	GO:0051336	regulation of hydrolase activity	0.00134889	22	HTR2A/MBP/THBS1/TIAM2/VAV3/ADCYAP1/SERPINE2/ARL6IP5/KALRN/FGFR3/RCAN1/PPT1/TIMP3/GNA12/MAGI2/ROCK2/RASGRF1/CDK5RAP3/ASPH/SIPA1L1/EFNA5/RGS2	22/267
GO:0035556	GO:BP	GO:0035556	intracellular signal transduction	0.00139573	46	SEMA7A/HTR2A/MBP/THBS1/GARNL3/TIAM2/RIT2/VAV3/MAP2K1/ADCYAP1/ARL6IP5/FOS/FGFR3/TP53BP2/RCAN1/IGFBP6/SMYD2/MTURN/EDNRB/NTS/PTTG1IP/NDRG2/S100A13/HSPB1/GPR37L1/SOX4/VIM/TIMP3/CCN2/GNA12/TLK1/MAGI2/CIT/MINK1/ROCK2/PTK2B/RASGRF1/CDK5RAP3/ENG/RGL1/ATP2B4/ASB13/CADM4/SIPA1L1/PHLPP1/RGS2	46/267
GO:0051716	GO:BP	GO:0051716	cellular response to stimulus	0.00150325	99	SEMA7A/HTR2A/MBP/THBS1/ADAM23/CALB1/GARNL3/ESRRG/CACNA2D1/TIAM2/CDH6/RIT2/VAV3/MAP2K1/ADCYAP1/SERPINE2/ARL6IP5/DIXDC1/FOS/SETD7/FGFR3/ZNF365/GFAP/CAPN2/TP53BP2/GNAL/DDIT4L/LOC100894903/RCAN1/IGFBP6/SMYD2/MTURN/EDNRB/NTS/CD9/PTTG1IP/GJA1/HPGD/NDRG2/IRS2/PLPP1/BRINP3/SLC38A2/PDYN/S100A13/SEC14L1/NPTX1/INHBA/MORF4L1/PRLH/HSPB1/GPR37L1/SOX4/FAM210B/EFHD1/HTRA1/VIM/TIMP3/SEMA3F/CCN2/IER5/SLC2A8/POU3F2…	99/267
GO:0051128	GO:BP	GO:0051128	regulation of cellular component organization	0.00157619	43	SEMA7A/SCN1B/TBR1/NTNG1/RIT2/CNTNAP1/SERPINE2/HSPA2/DIXDC1/KALRN/ZNF365/GFAP/FHOD3/SYT2/PACSIN1/FHL1/PPT1/ANXA2/IGFBP7/BICD1/INHBA/CHMP2B/HECW2/VIM/SEMA3F/CCN2/POU3F2/TLK1/MAGI2/ROCK2/CNOT2/CPNE5/PTK2B/DGKB/NAPB/SLITRK1/HMBOX1/STMP1/CD63/SIPA1L1/BDNF/EFNA5/CLDN5	43/267
GO:0010646	GO:BP	GO:0010646	regulation of cell communication	0.00251767	54	SEMA7A/HTR2A/THBS1/CALB1/GARNL3/NTNG1/RIT2/MAP2K1/ADCYAP1/SERPINE2/ARL6IP5/DIXDC1/KALRN/FGFR3/GFAP/DDIT4L/RCAN1/IGFBP6/SMYD2/MTURN/NTS/PTTG1IP/GJA1/NDRG2/IRS2/S100A13/SEC14L1/NPTX1/INHBA/GPR37L1/SOX4/HTRA1/TIMP3/CCN2/GNA12/MAGI2/CIT/MINK1/CNOT2/PTK2B/RASGRF1/CDK5RAP3/DGKB/ENG/ATP2B4/STMP1/CD63/CADM4/IL6ST/SIPA1L1/NRARP/PHLPP1/TWSG1/RGS2	54/267
GO:0048583	GO:BP	GO:0048583	regulation of response to stimulus	0.00270663	60	SEMA7A/HTR2A/THBS1/GARNL3/TBR1/RIT2/VAV3/MAP2K1/ADCYAP1/SERPINE2/ARL6IP5/DIXDC1/FGFR3/ZNF365/DDIT4L/RCAN1/IGFBP6/SMYD2/MTURN/TRPC3/NTS/CD9/ANXA2/PTTG1IP/NDRG2/SLC38A2/S100A13/SEC14L1/NPTX1/INHBA/MORF4L1/HSPB1/GPR37L1/SOX4/EFHD1/HTRA1/TIMP3/SEMA3F/CCN2/IER5/GNA12/MAGI2/CIT/MINK1/CNOT2/PTK2B/RASGRF1/CDK5RAP3/ENG/ATP2B4/STMP1/CD63/CADM4/IL6ST/SIPA1L1/NRARP/PHLPP1/TWSG1/RARRES2/RGS2	60/267
GO:0051240	GO:BP	GO:0051240	positive regulation of multicellular organismal process	0.00286484	32	SEMA7A/MBP/THBS1/ABI3BP/ESRRG/VAV3/ADCYAP1/SERPINE2/KALRN/FOS/ZNF365/GFAP/TRPC3/IGFBP2/ANXA2/GATM/IRS2/S100A13/INHBA/HSPB1/SOX4/POU3F2/EPAS1/PTK2B/ENG/SLITRK1/STMP1/IL6ST/SLC7A5/BDNF/RGS2/MRTFB	32/267
GO:0080090	GO:BP	GO:0080090	regulation of primary metabolic process	0.00394681	81	SEMA7A/HTR2A/MBP/CDK2AP1/CUX1/THBS1/TBR1/ESRRG/RIT2/BHLHE40/MAP2K1/MTARC2/ADCYAP1/SERPINE2/HSPA2/DCAF6/HLF/ARL6IP5/FOS/SETD7/FGFR3/ZNF365/STARD4/EEF1A2/GFAP/TSC22D4/ARID3B/RCAN1/SMYD2/MTURN/EDNRB/NTS/GLO1/ANXA2/PTTG1IP/HPGD/NFIB/NECAB3/IRS2/SLC38A2/LHX2/PCGF5/INHBA/MORF4L1/HSPB1/NFIX/SOX4/ELOVL5/VIM/TIMP3/IER5/POU3F2/GNA12/EPAS1/DIPK2A/MAGI2/RGMB/ROCK2/KLF13/CNOT2/PXYLP1/PTK2B/CDK5RAP3/APBB2/ENG/…	81/267
GO:0007165	GO:BP	GO:0007165	signal transduction	0.00449425	82	SEMA7A/HTR2A/MBP/THBS1/ADAM23/GARNL3/ESRRG/TIAM2/CDH6/RIT2/VAV3/MAP2K1/ADCYAP1/SERPINE2/ARL6IP5/DIXDC1/FOS/FGFR3/TP53BP2/GNAL/DDIT4L/RCAN1/IGFBP6/SMYD2/MTURN/EDNRB/NTS/PTTG1IP/GJA1/HPGD/NDRG2/IRS2/PLPP1/PDYN/S100A13/SEC14L1/NPTX1/INHBA/PRLH/HSPB1/GPR37L1/SOX4/HTRA1/VIM/TIMP3/SEMA3F/CCN2/SLC2A8/GNA12/TLK1/MAGI2/CIT/RGMB/MINK1/ROCK2/CNOT2/PTK2B/RASGRF1/CDK5RAP3/GNAI2/DGKB/ENG/GPR158/RGL1/ATP2B4/STM…	82/267
GO:1901564	GO:BP	GO:1901564	organonitrogen compound metabolic process	0.0055091	97	SEMA7A/HTR2A/MBP/CDK2AP1/ADAMTS17/THBS1/ADAM23/PAM/CAMK2G/MMP17/MAP2K1/ADCYAP1/SERPINE2/PAK6/HSPA2/ARL6IP5/PCSK1/KALRN/SETD7/FGFR3/GALNT9/HR/EEF1A2/GFAP/ELOVL4/CAPN2/ASGR2/GALNT1/ADI1/PLAAT3/RCAN1/SMYD2/LYPLA1/PPT1/EDNRB/ANXA2/GATM/PTTG1IP/NECAB3/PLPP1/B3GALT1/TUSC3/APOC1/ANKRD9/PCGF5/INHBA/MORF4L1/HSPB1/SOX4/CHMP2B/ELOVL5/BLVRB/HECW2/TECR/HTRA1/VIM/ASPHD2/CAMK2B/TIMP3/HS3ST1/OAT/GNA12/SLC44A2/TL…	97/267
GO:0048708	GO:BP	GO:0048708	astrocyte differentiation	0.0062536	7	PLP1/SERPINE2/GFAP/GPR37L1/VIM/POU3F2/IL6ST	7/267
GO:0065008	GO:BP	GO:0065008	regulation of biological quality	0.00641369	45	SEMA7A/SCN1B/THBS1/CALB1/RIMS3/CACNA2D1/CNTNAP1/VAV3/SERPINE2/LOC100386406/ARL6IP5/PCSK1/KALRN/GFAP/ASGR2/FHOD3/FHL1/PPT1/EDNRB/TRPC3/CD9/ANXA2/GJA1/IRS2/INHBA/SCN2B/GPR37L1/SOX4/CADPS2/VIM/TBRG1/SEMA3F/GNA12/EPAS1/PTK2B/RASGRF1/DGKB/NAPB/SLITRK1/ATP2B4/SLC7A5/BDNF/CLDN5/RGS2/CLCN2	45/267
GO:0031323	GO:BP	GO:0031323	regulation of cellular metabolic process	0.00814939	88	SEMA7A/HTR2A/MBP/CDK2AP1/CUX1/PLP1/THBS1/TBR1/ESRRG/RIT2/BHLHE40/MAP2K1/MTARC2/ADCYAP1/SERPINE2/HSPA2/DCAF6/HLF/FOS/SETD7/FGFR3/ZNF365/STARD4/EEF1A2/GFAP/TSC22D4/ARID3B/RCAN1/SMYD2/MTURN/EDNRB/NTS/GLO1/SMARCD1/ANXA2/GJA1/NFIB/NDRG2/NECAB3/IRS2/SLC38A2/S100A13/LHX2/PCGF5/INHBA/MORF4L1/HSPB1/NFIX/SOX4/ELOVL5/VIM/TIMP3/CCN2/IER5/POU3F2/GNA12/EPAS1/DIPK2A/MAGI2/RGMB/ROCK2/KLF13/CNOT2/PXYLP1/PTK2B/CDK…	88/267
GO:0050767	GO:BP	GO:0050767	regulation of neurogenesis	0.00859213	12	SEMA7A/SERPINE2/KALRN/ZNF365/GFAP/ANXA2/LHX2/GPR37L1/SEMA3F/SLITRK1/IL6ST/BDNF	12/267
GO:0051094	GO:BP	GO:0051094	positive regulation of developmental process	0.00897437	27	SEMA7A/HTR2A/THBS1/ABI3BP/SERPINE2/KALRN/FOS/ZNF365/GFAP/SYT2/MTURN/GJA1/BRINP3/INHBA/HSPB1/SOX4/FAM210B/CCN2/POU3F2/CPNE5/PTK2B/ENG/SLITRK1/IL6ST/BDNF/CLDN5/MRTFB	27/267
GO:0031328	GO:BP	GO:0031328	positive regulation of cellular biosynthetic process	0.00930664	46	SEMA7A/HTR2A/MBP/PLP1/THBS1/TBR1/ESRRG/RIT2/MAP2K1/ADCYAP1/DCAF6/HLF/FOS/STARD4/NTS/SMARCD1/ANXA2/GJA1/NFIB/IRS2/SLC38A2/S100A13/LHX2/PCGF5/INHBA/NFIX/SOX4/ELOVL5/VIM/IER5/POU3F2/EPAS1/RGMB/ROCK2/KLF13/PXYLP1/CDK5RAP3/APBB2/ENG/HMBOX1/STMP1/TP53INP2/RNF10/SLC7A5/CLDN5/MRTFB	46/267
GO:0019222	GO:BP	GO:0019222	regulation of metabolic process	0.00976101	93	SEMA7A/HTR2A/MBP/CDK2AP1/CUX1/PLP1/THBS1/TBR1/ESRRG/RIT2/BHLHE40/MAP2K1/MTARC2/ADCYAP1/SERPINE2/HSPA2/DCAF6/HLF/ARL6IP5/FOS/SETD7/FGFR3/ZNF365/STARD4/EEF1A2/GFAP/TSC22D4/ARID3B/RCAN1/SMYD2/MTURN/EDNRB/NTS/GLO1/SMARCD1/ANXA2/GATM/PTTG1IP/GJA1/HPGD/NFIB/NDRG2/NECAB3/IRS2/SLC38A2/S100A13/LHX2/PCGF5/INHBA/MORF4L1/HSPB1/NFIX/SOX4/ELOVL5/VIM/TIMP3/CCN2/IER5/POU3F2/GNA12/EPAS1/DIPK2A/MAGI2/RGMB/ROCK2/KL…	93/267
GO:0016049	GO:BP	GO:0016049	cell growth	0.00986789	14	SEMA7A/SEMA5B/SERPINE2/PAK6/SYT2/FHL1/PPT1/IGFBP7/LHX2/INHBA/SEMA3F/CPNE5/EMX1/BDNF	14/267
GO:0048513	GO:BP	GO:0048513	animal organ development	0.0104668	47	BTBD3/SEMA7A/CALB1/ABI3BP/TBR1/CNTNAP1/SERPINE2/HLF/DIXDC1/KALRN/FOS/ZNF365/FHOD3/PLAAT3/RCAN1/FHL1/PPT1/EDNRB/ANXA2/GJA1/NFIB/IRS2/LHX2/INHBA/GPR37L1/SOX4/HTRA1/LUZP1/VIM/SEMA6D/SEMA3F/CCN2/POU3F2/EPAS1/DIPK2A/ROCK2/PTK2B/CDK5RAP3/ENG/EBP/LRIG1/ADARB1/EMX1/TWSG1/RARRES2/CLCN2/MRTFB	47/267
GO:0009891	GO:BP	GO:0009891	positive regulation of biosynthetic process	0.0109867	46	SEMA7A/HTR2A/MBP/PLP1/THBS1/TBR1/ESRRG/RIT2/MAP2K1/ADCYAP1/DCAF6/HLF/FOS/STARD4/NTS/SMARCD1/ANXA2/GJA1/NFIB/IRS2/SLC38A2/S100A13/LHX2/PCGF5/INHBA/NFIX/SOX4/ELOVL5/VIM/IER5/POU3F2/EPAS1/RGMB/ROCK2/KLF13/PXYLP1/CDK5RAP3/APBB2/ENG/HMBOX1/STMP1/TP53INP2/RNF10/SLC7A5/CLDN5/MRTFB	46/267
GO:0050790	GO:BP	GO:0050790	regulation of catalytic activity	0.0126979	31	HTR2A/MBP/THBS1/TIAM2/VAV3/MAP2K1/ADCYAP1/SERPINE2/ARL6IP5/KALRN/FGFR3/EEF1A2/RCAN1/PPT1/IRS2/TIMP3/GNA12/DIPK2A/SPTSSB/MAGI2/ROCK2/PTK2B/RASGRF1/CDK5RAP3/HMBOX1/ATP2B4/ASPH/ADARB1/SIPA1L1/EFNA5/RGS2	31/267
GO:0043408	GO:BP	GO:0043408	regulation of MAPK cascade	0.0137626	18	SEMA7A/HTR2A/THBS1/MAP2K1/ADCYAP1/ARL6IP5/FGFR3/IGFBP6/MTURN/NDRG2/GPR37L1/TIMP3/CCN2/MINK1/PTK2B/CDK5RAP3/PHLPP1/RGS2	18/267
GO:0003008	GO:BP	GO:0003008	system process	0.0155346	35	SCN1B/CALB1/TBR1/CACNA2D1/USH1C/SEMA5B/CNTNAP1/SERPINE2/PAK6/LOC100386406/ARL6IP5/KALRN/RCAN1/PPT1/EDNRB/TRPC3/GATM/GJA1/TUSC3/NPTX1/INHBA/SCN2B/GPR37L1/CHMP2B/S100A1/GNA12/EPAS1/ROCK2/ATP2B4/LRIG1/ADARB1/ANXA6/CLDN5/RGS2/GM2A	35/267
GO:0008285	GO:BP	GO:0008285	negative regulation of cell population proliferation	0.0173199	20	THBS1/ABI3BP/RIT2/MAP2K1/SERPINE2/ZNF365/GFAP/SMYD2/CD9/NFIB/NDRG2/INHBA/SOX4/VIM/TBRG1/SEMA3F/KLF13/PTK2B/ADARB1/TWSG1	20/267
GO:0045597	GO:BP	GO:0045597	positive regulation of cell differentiation	0.0198435	20	SEMA7A/HTR2A/ABI3BP/SERPINE2/KALRN/FOS/ZNF365/GFAP/MTURN/GJA1/BRINP3/INHBA/SOX4/FAM210B/CCN2/ENG/SLITRK1/IL6ST/BDNF/CLDN5	20/267
GO:0009966	GO:BP	GO:0009966	regulation of signal transduction	0.0219421	47	SEMA7A/HTR2A/THBS1/GARNL3/RIT2/MAP2K1/ADCYAP1/SERPINE2/ARL6IP5/DIXDC1/FGFR3/DDIT4L/RCAN1/IGFBP6/SMYD2/MTURN/NTS/PTTG1IP/NDRG2/S100A13/SEC14L1/NPTX1/INHBA/GPR37L1/SOX4/HTRA1/TIMP3/CCN2/GNA12/MAGI2/CIT/MINK1/CNOT2/PTK2B/RASGRF1/CDK5RAP3/ENG/ATP2B4/STMP1/CD63/CADM4/IL6ST/SIPA1L1/NRARP/PHLPP1/TWSG1/RGS2	47/267
GO:0021675	GO:BP	GO:0021675	nerve development	0.0224613	7	SERPINE2/LOC100386406/NPTX1/KCNA2/SEMA3F/LRIG1/ADARB1	7/267
GO:0051173	GO:BP	GO:0051173	positive regulation of nitrogen compound metabolic process	0.0231145	49	SEMA7A/HTR2A/MBP/CDK2AP1/THBS1/TBR1/ESRRG/RIT2/MAP2K1/ADCYAP1/HSPA2/DCAF6/HLF/ARL6IP5/FOS/FGFR3/ANXA2/PTTG1IP/NFIB/SLC38A2/LHX2/PCGF5/INHBA/MORF4L1/NFIX/SOX4/VIM/IER5/POU3F2/GNA12/EPAS1/DIPK2A/MAGI2/RGMB/ROCK2/KLF13/PXYLP1/PTK2B/CDK5RAP3/APBB2/ENG/HMBOX1/ATP2B4/TP53INP2/ASPH/IL6ST/RNF10/RARRES2/MRTFB	49/267
GO:0048588	GO:BP	GO:0048588	developmental cell growth	0.0244338	9	SEMA7A/SEMA5B/PAK6/SYT2/LHX2/SEMA3F/CPNE5/EMX1/BDNF	9/267
GO:0051174	GO:BP	GO:0051174	regulation of phosphorus metabolic process	0.0255316	26	SEMA7A/HTR2A/CDK2AP1/THBS1/MAP2K1/ADCYAP1/HSPA2/FGFR3/EEF1A2/RCAN1/IRS2/HSPB1/GNA12/DIPK2A/MAGI2/ROCK2/PTK2B/CDK5RAP3/ENG/PPP1R14B/ATP2B4/CADM4/ADARB1/IL6ST/RARRES2/RGS2	26/267
GO:0019220	GO:BP	GO:0019220	regulation of phosphate metabolic process	0.0255316	26	SEMA7A/HTR2A/CDK2AP1/THBS1/MAP2K1/ADCYAP1/HSPA2/FGFR3/EEF1A2/RCAN1/IRS2/HSPB1/GNA12/DIPK2A/MAGI2/ROCK2/PTK2B/CDK5RAP3/ENG/PPP1R14B/ATP2B4/CADM4/ADARB1/IL6ST/RARRES2/RGS2	26/267
GO:0000165	GO:BP	GO:0000165	MAPK cascade	0.0263108	19	SEMA7A/HTR2A/MBP/THBS1/MAP2K1/ADCYAP1/ARL6IP5/FGFR3/IGFBP6/MTURN/NDRG2/GPR37L1/TIMP3/CCN2/MINK1/PTK2B/CDK5RAP3/PHLPP1/RGS2	19/267
GO:1990138	GO:BP	GO:1990138	neuron projection extension	0.0277438	8	SEMA7A/SEMA5B/PAK6/SYT2/LHX2/SEMA3F/CPNE5/EMX1	8/267
GO:0022603	GO:BP	GO:0022603	regulation of anatomical structure morphogenesis	0.0287673	20	SEMA7A/THBS1/NTNG1/KALRN/SYT2/GJA1/HSPB1/SEMA3F/POU3F2/GNA12/ROCK2/CPNE5/PTK2B/ENG/SLITRK1/ATP2B4/SIPA1L1/BDNF/EFNA5/CLDN5	20/267
GO:0007267	GO:BP	GO:0007267	cell-cell signaling	0.0320249	28	SCN1B/CALB1/CACNA2D1/NTNG1/PVALB/SERPINE2/DIXDC1/KALRN/GFAP/UNC13C/PPT1/EDNRB/GJA1/NDRG2/IRS2/PDYN/NPTX1/INHBA/SOX4/CADPS2/KCNA2/RASGRF1/GNAI2/DGKB/UNC13B/NAPB/ADARB1/NRARP	28/267
GO:2000026	GO:BP	GO:2000026	regulation of multicellular organismal development	0.0321876	27	SEMA7A/THBS1/SERPINE2/KALRN/FOS/ZNF365/GFAP/MTURN/ANXA2/LHX2/INHBA/HSPB1/GPR37L1/SOX4/FAM210B/SEMA3F/CCN2/ROCK2/KLF13/PTK2B/ENG/SLITRK1/ATP2B4/IL6ST/NRARP/BDNF/CLDN5	27/267
GO:0007167	GO:BP	GO:0007167	enzyme-linked receptor protein signaling pathway	0.0344554	22	THBS1/FOS/FGFR3/HPGD/IRS2/INHBA/HSPB1/HTRA1/VIM/CCN2/SLC2A8/RGMB/PTK2B/ENG/CD63/CADM4/IL6ST/SIPA1L1/EFNA5/TWSG1/CLDN5/RARRES2	22/267
GO:0006629	GO:BP	GO:0006629	lipid metabolic process	0.0345281	28	HTR2A/PLP1/FGFR3/STARD4/EEF1A2/ELOVL4/ACSL6/PLAAT3/PPT1/EDNRB/HPGD/IRS2/PLPP1/B3GALT1/GDE1/PRLH/ELOVL5/TECR/SLC44A2/SPTSSB/DGKB/FADS1/NPC2/EBP/MSMO1/RARRES2/CLCN2/GM2A	28/267
GO:0051247	GO:BP	GO:0051247	positive regulation of protein metabolic process	0.0375741	27	SEMA7A/HTR2A/MBP/CDK2AP1/THBS1/MAP2K1/ADCYAP1/HSPA2/ARL6IP5/FGFR3/ANXA2/PTTG1IP/INHBA/SOX4/VIM/GNA12/DIPK2A/MAGI2/ROCK2/PXYLP1/PTK2B/CDK5RAP3/ENG/ATP2B4/ASPH/IL6ST/RARRES2	27/267
GO:0060255	GO:BP	GO:0060255	regulation of macromolecule metabolic process	0.0381873	86	SEMA7A/HTR2A/MBP/CDK2AP1/CUX1/PLP1/THBS1/TBR1/ESRRG/RIT2/BHLHE40/MAP2K1/MTARC2/ADCYAP1/SERPINE2/HSPA2/DCAF6/HLF/ARL6IP5/FOS/SETD7/FGFR3/ZNF365/GFAP/TSC22D4/ARID3B/RCAN1/SMYD2/MTURN/EDNRB/NTS/GLO1/SMARCD1/ANXA2/PTTG1IP/GJA1/NFIB/NDRG2/NECAB3/IRS2/SLC38A2/S100A13/LHX2/PCGF5/INHBA/MORF4L1/HSPB1/NFIX/SOX4/VIM/TIMP3/CCN2/IER5/POU3F2/GNA12/EPAS1/DIPK2A/MAGI2/RGMB/ROCK2/KLF13/CNOT2/PXYLP1/PTK2B/CDK5RAP3…	86/267
GO:0048523	GO:BP	GO:0048523	negative regulation of cellular process	0.0385667	72	HTR2A/MBP/THBS1/ABI3BP/TBR1/RIT2/BHLHE40/MAP2K1/SERPINE2/HSPA2/ARL6IP5/DIXDC1/KALRN/ZNF365/GFAP/FHOD3/DDIT4L/RCAN1/SMYD2/PACSIN1/FHL1/PPT1/EDNRB/NTS/CD9/GLO1/ANXA2/PTTG1IP/GJA1/HPGD/NFIB/NDRG2/IRS2/BRINP3/LHX2/SEC14L1/INHBA/GPR37L1/FSTL1/NFIX/SOX4/HTRA1/VIM/TBRG1/TIMP3/SEMA6D/SEMA3F/CCN2/POU3F2/DIPK2A/MAGI2/CIT/ROCK2/KLF13/CNOT2/PTK2B/CDK5RAP3/APBB2/ENG/HMBOX1/ATP2B4/TP53INP2/CADM4/ADARB1/IL6ST/S…	72/267
GO:0050890	GO:BP	GO:0050890	cognition	0.0394606	11	CALB1/TBR1/PAK6/ARL6IP5/KALRN/RCAN1/PPT1/GATM/TUSC3/CHMP2B/GM2A	11/267
GO:0016310	GO:BP	GO:0016310	phosphorylation	0.0411867	36	SEMA7A/HTR2A/CDK2AP1/THBS1/CAMK2G/MAP2K1/ADCYAP1/PAK6/HSPA2/KALRN/FGFR3/EEF1A2/PACSIN1/IRS2/HSPB1/CAMK2B/TLK1/DIPK2A/CAMKK1/CIT/MINK1/ROCK2/PTK2B/CDK5RAP3/DGKB/ENG/PPP1R14B/ATP2B4/CDKL2/CADM4/ADARB1/IL6ST/PDXK/NRBP1/RARRES2/RGS2	36/267
GO:0036211	GO:BP	GO:0036211	protein modification process	0.0460651	56	SEMA7A/HTR2A/CDK2AP1/THBS1/CAMK2G/MAP2K1/ADCYAP1/PAK6/HSPA2/KALRN/SETD7/FGFR3/GALNT9/HR/GALNT1/RCAN1/SMYD2/LYPLA1/PPT1/PTTG1IP/B3GALT1/TUSC3/ANKRD9/PCGF5/MORF4L1/HSPB1/SOX4/HECW2/ASPHD2/CAMK2B/GNA12/TLK1/EPAS1/RNF144A/DIPK2A/CAMKK1/MAGI2/CIT/MINK1/ROCK2/PTK2B/CDK5RAP3/ENG/ATP2B4/CDKL2/ASB13/RNF157/ASPH/CADM4/ADARB1/IL6ST/RNF10/NRBP1/UBA3/RARRES2/RGS2	56/267
GO:0007155	GO:BP	GO:0007155	cell adhesion	0.0463186	27	EDIL3/MBP/THBS1/ABI3BP/NTNG1/CDH6/CNTNAP1/SERPINE2/PCDH7/DSG3/CD9/IGFBP2/CLDN11/UTRN/IGFBP7/SOX4/CCDC80/CCN2/RGMB/MINK1/PTK2B/SLITRK1/CD63/IL6ST/NRARP/EFNA5/TWSG1	27/267
GO:0044283	GO:BP	GO:0044283	small molecule biosynthetic process	0.0487835	16	PLP1/STARD4/ELOVL4/ADI1/GATM/ELOVL5/TECR/OAT/SPTSSB/PTK2B/FADS1/ATP2B4/EBP/PSAT1/PDXK/CLCN2	16/267
GO:0023056	GO:BP	GO:0023056	positive regulation of signaling	0.0494654	31	SEMA7A/HTR2A/THBS1/CALB1/MAP2K1/ADCYAP1/SERPINE2/ARL6IP5/DIXDC1/FGFR3/GFAP/IGFBP6/MTURN/NTS/ANXA2/IRS2/S100A13/INHBA/GPR37L1/SOX4/TIMP3/CCN2/MINK1/PTK2B/CDK5RAP3/ENG/STMP1/CD63/IL6ST/NRARP/TWSG1	31/267
GO:0016020	GO:CC	GO:0016020	membrane	1.85657460314498e-13	157	TAFA2/SEMA7A/HTR2A/SCN1B/CUX1/PLP1/CABP1/THBS1/CLEC2L/ADAM23/KCNS2/PAM/RIMS3/KCNS1/CACNA2D1/NTNG1/SLC24A2/TIAM2/CDH6/PAQR9/TRPM3/SEMA5B/RIT2/CNTNAP1/VAV3/RPRM/MAP2K1/MTARC2/KCNQ5/LOC100386406/HSPA2/ARL6IP5/KALRN/KCNH7/FGFR3/GALNT9/GFAP/ELOVL4/CAPN2/SFXN5/SRI/ASGR2/ACSL6/UNC13C/GALNT1/ADI1/PLAAT3/OGFRL1/SYT2/PACSIN1/PCDH7/FHL1/PARM1/LYPLA1/PPT1/EDNRB/ARL4A/TRPC3/DSG3/MYO5A/CD9/S100A16/GLO1/ANXA2/T…	157/283
GO:0071944	GO:CC	GO:0071944	cell periphery	1.90252854701142e-12	97	SEMA7A/HTR2A/SCN1B/PLP1/CABP1/THBS1/ADAM23/KCNS2/ABI3BP/KCNS1/CACNA2D1/NTNG1/SLC24A2/CDH6/MMP17/RIT2/VAV3/MAP2K1/KCNQ5/SERPINE2/LOC100386406/HSPA2/ARL6IP5/FGFR3/CAPN2/ADI1/PACSIN1/PCDH7/FHL1/PARM1/LYPLA1/EDNRB/ARL4A/TRPC3/DSG3/CD9/S100A16/GLO1/ANXA2/CNP/CLDN11/GJA1/HPGD/IRS2/PLPP1/SLC38A2/PDYN/SHROOM2/S100A13/UTRN/ABCC8/KCNJ3/SCN2B/GPR37L1/CHMP2B/BLVRB/SLC35G2/CCDC80/EPB41L2/KCNA2/HTRA1/LAMC2/VIM…	97/283
GO:0005886	GO:CC	GO:0005886	plasma membrane	5.89658852004062e-10	87	SEMA7A/HTR2A/SCN1B/PLP1/CABP1/THBS1/ADAM23/KCNS2/KCNS1/CACNA2D1/NTNG1/SLC24A2/CDH6/RIT2/VAV3/MAP2K1/KCNQ5/LOC100386406/HSPA2/ARL6IP5/FGFR3/CAPN2/ADI1/PACSIN1/PCDH7/FHL1/PARM1/LYPLA1/EDNRB/ARL4A/TRPC3/DSG3/CD9/S100A16/GLO1/ANXA2/CNP/CLDN11/GJA1/HPGD/IRS2/PLPP1/SLC38A2/PDYN/S100A13/UTRN/ABCC8/KCNJ3/SCN2B/GPR37L1/CHMP2B/BLVRB/SLC35G2/EPB41L2/KCNA2/HTRA1/VIM/SEMA6D/SLC2A8/GNA12/SLC44A2/KCNC2/MAGI2/RG…	87/283
GO:0030054	GO:CC	GO:0030054	cell junction	8.03630139236706e-09	46	HTR2A/SCN1B/CABP1/ADAM23/CALB1/NTNG1/CDH6/PVALB/CPLX1/CNTNAP1/SERPINE2/PAK6/LOC100386406/DCAF6/ARL6IP5/EEF1A2/UNC13C/TP53BP2/SYT2/PACSIN1/PPT1/DSG3/CLDN11/GJA1/LGI3/PDYN/UTRN/NPTX1/KCNJ3/CADPS2/SLC35G2/PPFIA4/EPB41L2/KCNA2/SEMA3F/MAGI2/PTK2B/GNAI2/DGKB/UNC13B/NAPB/TMEM47/SLITRK1/CADM4/ADARB1/CLDN5	46/283
GO:0045202	GO:CC	GO:0045202	synapse	1.27370716799374e-07	34	HTR2A/CABP1/ADAM23/CALB1/NTNG1/CDH6/PVALB/CPLX1/CNTNAP1/SERPINE2/PAK6/ARL6IP5/EEF1A2/UNC13C/SYT2/PACSIN1/PPT1/LGI3/PDYN/UTRN/NPTX1/KCNJ3/CADPS2/SLC35G2/PPFIA4/KCNA2/SEMA3F/PTK2B/GNAI2/DGKB/UNC13B/NAPB/SLITRK1/ADARB1	34/283
GO:0098793	GO:CC	GO:0098793	presynapse	2.9695762924308e-06	17	HTR2A/ADAM23/CALB1/NTNG1/ARL6IP5/UNC13C/SYT2/PACSIN1/PPT1/LGI3/KCNJ3/CADPS2/SLC35G2/PPFIA4/KCNA2/PTK2B/UNC13B	17/283
GO:0034703	GO:CC	GO:0034703	cation channel complex	1.33316777906446e-05	13	SCN1B/KCNS2/KCNS1/CACNA2D1/KCNQ5/LOC100386406/HSPA2/ABCC8/KCNJ3/SCN2B/KCNA2/KCNC2/KCNC1	13/283
GO:0043005	GO:CC	GO:0043005	neuron projection	1.39479808181719e-05	25	HTR2A/SCN1B/NEFM/CALB1/PVALB/RIT2/CNTNAP1/LOC100386406/SHTN1/PACSIN1/PPT1/CLDN11/LGI3/NFIB/LCA5/ELOVL5/KCNA2/VIM/GNA12/SCRG1/CPNE5/KCNC1/RASGRF1/GNAI2/IL6ST	25/283
GO:0012505	GO:CC	GO:0012505	endomembrane system	5.96170913856016e-05	65	CUX1/CABP1/THBS1/PAM/CACNA2D1/RIT2/MAP2K1/SERPINE2/PCSK1/FOS/FGFR3/GALNT9/ELOVL4/CAPN2/ACSL6/GALNT1/PLAAT3/SYT2/PARM1/LYPLA1/PPT1/NTS/MYO5A/ANXA2/MOXD1/VAMP1/GJA1/LGI3/NDRG2/NECAB3/B3GALT1/TUSC3/PDYN/BICD1/SEC14L1/PCGF5/CHMP2B/ELOVL5/SLC35G2/S100A1/TECR/QSOX2/TUBA8/SEMA6D/CCN2/HS3ST1/RNF144A/DIPK2A/SPTSSB/SCRG1/MINK1/PXYLP1/RCN2/EMID1/APBB2/GNAI2/FADS1/ACKR1/CD63/EBP/BCAP29/SEC61A2/ASPH/ANXA6/NRB…	65/283
GO:0044297	GO:CC	GO:0044297	cell body	0.000234345	13	CALB1/RIT2/LOC100386406/GFAP/SHTN1/PPT1/ELOVL5/KCNA2/GNA12/CPNE5/KCNC1/GNAI2/IL6ST	13/283
GO:0030424	GO:CC	GO:0030424	axon	0.000235843	15	HTR2A/SCN1B/NEFM/CALB1/PVALB/CNTNAP1/LOC100386406/SHTN1/PPT1/CLDN11/LGI3/NFIB/KCNA2/KCNC1/RASGRF1	15/283
GO:0044304	GO:CC	GO:0044304	main axon	0.000646021	6	SCN1B/CNTNAP1/LOC100386406/LGI3/KCNA2/KCNC1	6/283
GO:0034705	GO:CC	GO:0034705	potassium channel complex	0.00101355	8	KCNS2/KCNS1/KCNQ5/ABCC8/KCNJ3/KCNA2/KCNC2/KCNC1	8/283
GO:0031410	GO:CC	GO:0031410	cytoplasmic vesicle	0.00129273	33	HTR2A/THBS1/PAM/CACNA2D1/SERPINE2/PCSK1/FGFR3/STARD4/SYT2/PACSIN1/PARM1/PPT1/NTS/MYO5A/ANXA2/CNP/VAMP1/LGI3/PDYN/ANKRD9/BICD1/CHMP2B/CADPS2/SLC35G2/TUBA8/VIM/DIPK2A/APBB2/GNAI2/ACKR1/CD63/ANXA6/APPBP2	33/283
GO:0097708	GO:CC	GO:0097708	intracellular vesicle	0.00142026	33	HTR2A/THBS1/PAM/CACNA2D1/SERPINE2/PCSK1/FGFR3/STARD4/SYT2/PACSIN1/PARM1/PPT1/NTS/MYO5A/ANXA2/CNP/VAMP1/LGI3/PDYN/ANKRD9/BICD1/CHMP2B/CADPS2/SLC35G2/TUBA8/VIM/DIPK2A/APBB2/GNAI2/ACKR1/CD63/ANXA6/APPBP2	33/283
GO:0034702	GO:CC	GO:0034702	monoatomic ion channel complex	0.00181361	13	SCN1B/KCNS2/KCNS1/CACNA2D1/KCNQ5/LOC100386406/HSPA2/ABCC8/KCNJ3/SCN2B/KCNA2/KCNC2/KCNC1	13/283
GO:0098797	GO:CC	GO:0098797	plasma membrane protein complex	0.00217163	18	SCN1B/KCNS2/KCNS1/CACNA2D1/KCNQ5/LOC100386406/HSPA2/ANXA2/GJA1/UTRN/ABCC8/KCNJ3/SCN2B/KCNA2/KCNC2/KCNC1/IL6ST/SLC7A5	18/283
GO:0031982	GO:CC	GO:0031982	vesicle	0.00244292	34	HTR2A/THBS1/PAM/CACNA2D1/SERPINE2/PCSK1/FGFR3/STARD4/SYT2/PACSIN1/PARM1/PPT1/NTS/MYO5A/CD9/ANXA2/CNP/VAMP1/LGI3/PDYN/ANKRD9/BICD1/CHMP2B/CADPS2/SLC35G2/TUBA8/VIM/DIPK2A/APBB2/GNAI2/ACKR1/CD63/ANXA6/APPBP2	34/283
GO:0030315	GO:CC	GO:0030315	T-tubule	0.00260902	5	SCN1B/CACNA2D1/LOC100386406/SCN2B/ATP2B4	5/283
GO:0120025	GO:CC	GO:0120025	plasma membrane bounded cell projection	0.00431821	33	HTR2A/SCN1B/NEFM/CALB1/USH1C/PVALB/RIT2/CNTNAP1/LOC100386406/GFAP/CAPN2/SHTN1/PACSIN1/PPT1/MYO5A/CLDN11/LGI3/NFIB/LCA5/UTRN/ELOVL5/KCNA2/VIM/GNA12/SCRG1/CPNE5/KCNC1/PTK2B/RASGRF1/GNAI2/ATP2B4/IL6ST/SLC7A5	33/283
GO:0008076	GO:CC	GO:0008076	voltage-gated potassium channel complex	0.0047072	7	KCNS2/KCNS1/KCNQ5/KCNJ3/KCNA2/KCNC2/KCNC1	7/283
GO:0005737	GO:CC	GO:0005737	cytoplasm	0.00587663	166	BTBD3/HTR2A/CDK2AP1/CUX1/CABP1/THBS1/KCNS2/PAM/CALB1/KCNS1/CACNA2D1/USH1C/TIAM2/PVALB/RIT2/VAV3/RPRM/MAP2K1/KCNQ5/SERPINE2/LOC100386406/HSPA2/DCAF6/ARL6IP5/DIXDC1/PCSK1/KALRN/FOS/S100B/FGFR3/QKI/GALNT9/STARD4/EEF1A2/BTBD10/GFAP/ELOVL4/CAPN2/SFXN5/ACSL6/UNC13C/SHTN1/TP53BP2/GALNT1/DDIT4L/PDLIM3/ADI1/PLAAT3/SYT2/RCAN1/SMYD2/PACSIN1/FHL1/PARM1/MTURN/LYPLA1/PPT1/ARL4A/NTS/MYO5A/S100A16/GLO1/ANXA2/GAT…	166/283
GO:0043025	GO:CC	GO:0043025	neuronal cell body	0.00739872	10	CALB1/LOC100386406/SHTN1/PPT1/ELOVL5/KCNA2/GNA12/CPNE5/KCNC1/IL6ST	10/283
GO:0042383	GO:CC	GO:0042383	sarcolemma	0.00852414	7	SCN1B/CACNA2D1/LOC100386406/ANXA2/UTRN/SCN2B/ATP2B4	7/283
GO:0099503	GO:CC	GO:0099503	secretory vesicle	0.00910321	13	THBS1/CACNA2D1/SERPINE2/PCSK1/SYT2/PPT1/VAMP1/LGI3/PDYN/BICD1/SLC35G2/TUBA8/GNAI2	13/283
GO:0042995	GO:CC	GO:0042995	cell projection	0.010041	33	HTR2A/SCN1B/NEFM/CALB1/USH1C/PVALB/RIT2/CNTNAP1/LOC100386406/GFAP/CAPN2/SHTN1/PACSIN1/PPT1/MYO5A/CLDN11/LGI3/NFIB/LCA5/UTRN/ELOVL5/KCNA2/VIM/GNA12/SCRG1/CPNE5/KCNC1/PTK2B/RASGRF1/GNAI2/ATP2B4/IL6ST/SLC7A5	33/283
GO:0098978	GO:CC	GO:0098978	glutamatergic synapse	0.030631	12	ADAM23/CALB1/NTNG1/CDH6/CNTNAP1/NPTX1/PPFIA4/SEMA3F/PTK2B/DGKB/NAPB/SLITRK1	12/283
GO:1902495	GO:CC	GO:1902495	transmembrane transporter complex	0.0314932	13	SCN1B/KCNS2/KCNS1/CACNA2D1/KCNQ5/LOC100386406/HSPA2/ABCC8/KCNJ3/SCN2B/KCNA2/KCNC2/KCNC1	13/283
GO:0005576	GO:CC	GO:0005576	extracellular region	0.0331012	32	MATN4/ADAMTS17/THBS1/ADCYAP1/SERPINE2/PCSK1/IGFBP6/PPT1/NTS/CD9/IGFBP2/S100A16/ANXA2/CNP/LGI3/PDYN/S100A13/APOC1/IGFBP7/INHBA/FSTL1/HTRA1/TIMP3/CCN2/DIPK2A/ENG/NPC2/CD63/PON2/BDNF/TWSG1/RARRES2	32/283
GO:0031012	GO:CC	GO:0031012	extracellular matrix	0.0352588	11	THBS1/ABI3BP/MMP17/SERPINE2/ANXA2/CCDC80/LAMC2/TIMP3/CCN2/EMID1/RARRES2	11/283
GO:0030312	GO:CC	GO:0030312	external encapsulating structure	0.0366942	11	THBS1/ABI3BP/MMP17/SERPINE2/ANXA2/CCDC80/LAMC2/TIMP3/CCN2/EMID1/RARRES2	11/283
GO:0036477	GO:CC	GO:0036477	somatodendritic compartment	0.0452049	13	HTR2A/CALB1/RIT2/LOC100386406/SHTN1/PPT1/ELOVL5/KCNA2/GNA12/CPNE5/KCNC1/GNAI2/IL6ST	13/283
GO:0046873	GO:MF	GO:0046873	metal ion transmembrane transporter activity	1.36551749241692e-05	22	SCN1B/KCNS2/KCNS1/CACNA2D1/SLC24A2/TRPM3/KCNQ5/LOC100386406/KCNH7/TRPC3/SLC38A2/TUSC3/ABCC8/KCNJ3/SCN2B/NIPAL2/KCNK12/KCNA2/KCNC2/KCNC1/ATP2B4/NALCN	22/275
GO:0005244	GO:MF	GO:0005244	voltage-gated monoatomic ion channel activity	6.59056094552072e-05	14	SCN1B/KCNS2/KCNS1/CACNA2D1/KCNQ5/LOC100386406/KCNH7/KCNJ3/SCN2B/KCNK12/KCNA2/KCNC2/KCNC1/CLCN2	14/275
GO:0005509	GO:MF	GO:0005509	calcium ion binding	6.84908501951356e-05	27	EDIL3/MATN4/CABP1/THBS1/CALB1/CDH6/PVALB/S100B/CAPN2/SRI/UNC13C/SYT2/CRTAC1/PCDH7/DSG3/S100A16/ANXA2/NECAB3/S100A13/FSTL1/S100A1/EFHD1/CRELD1/RCN2/DGKB/UNC13B/ANXA6	27/275
GO:0022832	GO:MF	GO:0022832	voltage-gated channel activity	7.68854802335413e-05	14	SCN1B/KCNS2/KCNS1/CACNA2D1/KCNQ5/LOC100386406/KCNH7/KCNJ3/SCN2B/KCNK12/KCNA2/KCNC2/KCNC1/CLCN2	14/275
GO:0015079	GO:MF	GO:0015079	potassium ion transmembrane transporter activity	0.000284836	12	KCNS2/KCNS1/SLC24A2/KCNQ5/KCNH7/ABCC8/KCNJ3/SCN2B/KCNK12/KCNA2/KCNC2/KCNC1	12/275
GO:0005261	GO:MF	GO:0005261	monoatomic cation channel activity	0.000345117	17	SCN1B/KCNS2/KCNS1/CACNA2D1/TRPM3/KCNQ5/LOC100386406/KCNH7/TRPC3/ABCC8/KCNJ3/SCN2B/KCNK12/KCNA2/KCNC2/KCNC1/NALCN	17/275
GO:0005267	GO:MF	GO:0005267	potassium channel activity	0.000408132	11	KCNS2/KCNS1/KCNQ5/KCNH7/ABCC8/KCNJ3/SCN2B/KCNK12/KCNA2/KCNC2/KCNC1	11/275
GO:0015075	GO:MF	GO:0015075	monoatomic ion transmembrane transporter activity	0.00145611	26	SCN1B/KCNS2/KCNS1/CACNA2D1/SLC24A2/TRPM3/KCNQ5/LOC100386406/KCNH7/SFXN5/TRPC3/GJA1/SLC38A2/TUSC3/ABCC8/KCNJ3/SCN2B/NIPAL2/KCNK12/KCNA2/KCNC2/KCNC1/ATP2B4/NALCN/ANXA6/CLCN2	26/275
GO:0022890	GO:MF	GO:0022890	inorganic cation transmembrane transporter activity	0.00147569	22	SCN1B/KCNS2/KCNS1/CACNA2D1/SLC24A2/TRPM3/KCNQ5/LOC100386406/KCNH7/TRPC3/SLC38A2/TUSC3/ABCC8/KCNJ3/SCN2B/NIPAL2/KCNK12/KCNA2/KCNC2/KCNC1/ATP2B4/NALCN	22/275
GO:0005249	GO:MF	GO:0005249	voltage-gated potassium channel activity	0.00151989	9	KCNS2/KCNS1/KCNQ5/KCNH7/KCNJ3/SCN2B/KCNA2/KCNC2/KCNC1	9/275
GO:0005216	GO:MF	GO:0005216	monoatomic ion channel activity	0.00160724	19	SCN1B/KCNS2/KCNS1/CACNA2D1/TRPM3/KCNQ5/LOC100386406/KCNH7/TRPC3/ABCC8/KCNJ3/SCN2B/KCNK12/KCNA2/KCNC2/KCNC1/NALCN/ANXA6/CLCN2	19/275
GO:0015267	GO:MF	GO:0015267	channel activity	0.00181464	20	SCN1B/KCNS2/KCNS1/CACNA2D1/TRPM3/KCNQ5/LOC100386406/KCNH7/TRPC3/GJA1/ABCC8/KCNJ3/SCN2B/KCNK12/KCNA2/KCNC2/KCNC1/NALCN/ANXA6/CLCN2	20/275
GO:0022803	GO:MF	GO:0022803	passive transmembrane transporter activity	0.00181464	20	SCN1B/KCNS2/KCNS1/CACNA2D1/TRPM3/KCNQ5/LOC100386406/KCNH7/TRPC3/GJA1/ABCC8/KCNJ3/SCN2B/KCNK12/KCNA2/KCNC2/KCNC1/NALCN/ANXA6/CLCN2	20/275
GO:0022843	GO:MF	GO:0022843	voltage-gated monoatomic cation channel activity	0.00234119	10	KCNS2/KCNS1/CACNA2D1/KCNQ5/KCNH7/KCNJ3/SCN2B/KCNA2/KCNC2/KCNC1	10/275
GO:1901702	GO:MF	GO:1901702	salt transmembrane transporter activity	0.00285388	22	SCN1B/KCNS2/KCNS1/CACNA2D1/SLC24A2/TRPM3/KCNQ5/LOC100386406/KCNH7/TRPC3/SLC38A2/ABCC8/KCNJ3/SCN2B/KCNK12/KCNA2/SLC44A2/KCNC2/KCNC1/ATP2B4/NALCN/CLCN2	22/275
GO:0005515	GO:MF	GO:0005515	protein binding	0.00320092	141	BTBD3/SEMA7A/HTR2A/MBP/CDK2AP1/CABP1/THBS1/KCNS2/PAM/ABI3BP/RIMS3/KCNS1/NTNG1/USH1C/CAMK2G/TIAM2/CPLX1/SEMA5B/RIT2/BHLHE40/VAV3/MAP2K1/ADCYAP1/SERPINE2/HSPA2/TLNRD1/DCAF6/COL9A2/DIXDC1/PCSK1/KALRN/FOS/SETD7/FGFR3/EEF1A2/BTBD10/GFAP/ACSL6/SHTN1/TP53BP2/PDLIM3/ZBTB47/IGFBP6/SMYD2/PACSIN1/FHL1/TRPC3/NTS/MYO5A/CD9/IGFBP2/S100A16/ANXA2/TSPAN17/PTTG1IP/CLDN11/GJA1/LGI3/HPGD/IRS2/CNTN3/PDYN/SHROOM2/S100…	141/275
GO:0008324	GO:MF	GO:0008324	monoatomic cation transmembrane transporter activity	0.00456406	22	SCN1B/KCNS2/KCNS1/CACNA2D1/SLC24A2/TRPM3/KCNQ5/LOC100386406/KCNH7/TRPC3/SLC38A2/TUSC3/ABCC8/KCNJ3/SCN2B/NIPAL2/KCNK12/KCNA2/KCNC2/KCNC1/ATP2B4/NALCN	22/275
GO:0030215	GO:MF	GO:0030215	semaphorin receptor binding	0.00649032	5	SEMA7A/SEMA5B/RIT2/SEMA6D/SEMA3F	5/275
GO:0019838	GO:MF	GO:0019838	growth factor binding	0.0067279	9	THBS1/FGFR3/IGFBP6/IGFBP2/S100A13/IGFBP7/ENG/IL6ST/TWSG1	9/275
GO:0022839	GO:MF	GO:0022839	monoatomic ion gated channel activity	0.00745407	15	SCN1B/KCNS2/KCNS1/CACNA2D1/KCNQ5/LOC100386406/KCNH7/KCNJ3/SCN2B/KCNK12/KCNA2/KCNC2/KCNC1/ANXA6/CLCN2	15/275
GO:0022836	GO:MF	GO:0022836	gated channel activity	0.00778239	15	SCN1B/KCNS2/KCNS1/CACNA2D1/KCNQ5/LOC100386406/KCNH7/KCNJ3/SCN2B/KCNK12/KCNA2/KCNC2/KCNC1/ANXA6/CLCN2	15/275
GO:0015318	GO:MF	GO:0015318	inorganic molecular entity transmembrane transporter activity	0.0130146	23	SCN1B/KCNS2/KCNS1/CACNA2D1/SLC24A2/TRPM3/KCNQ5/LOC100386406/KCNH7/TRPC3/SLC38A2/TUSC3/ABCC8/KCNJ3/SCN2B/NIPAL2/KCNK12/KCNA2/KCNC2/KCNC1/ATP2B4/NALCN/CLCN2	23/275
GO:0005215	GO:MF	GO:0005215	transporter activity	0.0279998	32	SCN1B/KCNS2/KCNS1/CACNA2D1/SLC24A2/TRPM3/KCNQ5/LOC100386406/KCNH7/STARD4/SFXN5/TRPC3/GJA1/SLC38A2/TUSC3/SLC35F4/ABCC8/KCNJ3/SCN2B/NIPAL2/KCNK12/KCNA2/SLC2A8/SLC44A2/KCNC2/KCNC1/ATP2B4/NPC2/NALCN/ANXA6/SLC7A5/CLCN2	32/275
GO:0022857	GO:MF	GO:0022857	transmembrane transporter activity	0.0394143	30	SCN1B/KCNS2/KCNS1/CACNA2D1/SLC24A2/TRPM3/KCNQ5/LOC100386406/KCNH7/SFXN5/TRPC3/GJA1/SLC38A2/TUSC3/SLC35F4/ABCC8/KCNJ3/SCN2B/NIPAL2/KCNK12/KCNA2/SLC2A8/SLC44A2/KCNC2/KCNC1/ATP2B4/NALCN/ANXA6/SLC7A5/CLCN2	30/275
KEGG:04921	KEGG	KEGG:04921	Oxytocin signaling pathway	0.00815502	9	CACNA2D1/CAMK2G/MAP2K1/FOS/RCAN1/KCNJ3/CAMK2B/ROCK2/GNAI2	9/97
KEGG:00062	KEGG	KEGG:00062	Fatty acid elongation	0.0322074	4	ELOVL4/PPT1/ELOVL5/TECR	4/97

## Sheet: V1_P16L4b_vs_V2_P16L4
	Category	ID	Description	p.adjust	Count	geneID	GeneRatio
GO:0065007	GO:BP	GO:0065007	biological regulation	1.67484211278081e-25	262	SCN1B/SEMA7A/EDIL3/CUX1/ASGR2/TBR1/MBP/NTNG1/CACNA2D1/MAP2K1/CITED2/HTR2A/STARD4/TIAM1/SEC14L1/VAV3/PLP1/PVALB/BRINP3/ESRRG/KCNS2/CDK2AP1/FOS/LMO3/TRPC3/LIN7A/HSPA2/BACE2/TIAM2/KCNS1/PCSK1/ADAM23/DIXDC1/FHL1/FAT3/RIMS3/GARNL3/KALRN/MEF2A/MINK1/IGFBP6/TRPV6/KCNH7/RGMB/HPGD/TENM2/UNC13C/KCNJ3/GLRA3/LOC100386406/FHOD3/CNTNAP1/TSHZ1/CD44/NPTX1/IER5/KCNIP3/ASPH/KCNK12/SLC2A13/NECAB3/ETS2/SDCBP/RAB3B/S…	262/374
GO:0050789	GO:BP	GO:0050789	regulation of biological process	2.21563628742316e-24	255	SCN1B/SEMA7A/EDIL3/CUX1/TBR1/MBP/NTNG1/CACNA2D1/MAP2K1/CITED2/HTR2A/STARD4/TIAM1/SEC14L1/VAV3/PLP1/PVALB/BRINP3/ESRRG/KCNS2/CDK2AP1/FOS/LMO3/TRPC3/LIN7A/HSPA2/BACE2/TIAM2/KCNS1/ADAM23/DIXDC1/FHL1/FAT3/GARNL3/KALRN/MEF2A/MINK1/IGFBP6/TRPV6/KCNH7/RGMB/HPGD/TENM2/UNC13C/KCNJ3/GLRA3/LOC100386406/FHOD3/CNTNAP1/TSHZ1/CD44/NPTX1/IER5/KCNIP3/ASPH/KCNK12/SLC2A13/NECAB3/ETS2/SDCBP/RAB3B/SMYD2/TPM1/ATRNL1/A…	255/374
GO:0050794	GO:BP	GO:0050794	regulation of cellular process	2.80578594510463e-21	241	SCN1B/SEMA7A/EDIL3/CUX1/TBR1/MBP/NTNG1/CACNA2D1/MAP2K1/CITED2/HTR2A/STARD4/TIAM1/SEC14L1/VAV3/PLP1/BRINP3/ESRRG/KCNS2/CDK2AP1/FOS/LMO3/TRPC3/HSPA2/BACE2/TIAM2/KCNS1/ADAM23/DIXDC1/FHL1/FAT3/GARNL3/KALRN/MEF2A/MINK1/IGFBP6/KCNH7/RGMB/HPGD/TENM2/KCNJ3/GLRA3/LOC100386406/FHOD3/CNTNAP1/TSHZ1/CD44/NPTX1/IER5/KCNIP3/KCNK12/NECAB3/ETS2/SDCBP/RAB3B/SMYD2/TPM1/ATRNL1/ADCYAP1/MORF4L1/ASIC1/SLC2A8/NEGR1/ARL6…	241/374
GO:0007154	GO:BP	GO:0007154	cell communication	2.77016362906892e-10	139	SCN1B/SEMA7A/MBP/NTNG1/CACNA2D1/MAP2K1/HTR2A/TIAM1/SEC14L1/VAV3/PVALB/ESRRG/FOS/LMO3/LIN7A/TIAM2/ADAM23/DIXDC1/GARNL3/KALRN/MEF2A/MINK1/IGFBP6/TRPV6/RGMB/HPGD/TENM2/UNC13C/GLRA3/LOC100386406/CNTNAP1/CD44/NPTX1/SDCBP/RAB3B/SMYD2/ATRNL1/ADCYAP1/CADPS2/ASIC1/SLC2A8/ARL6IP5/RCAN2/PHLPP1/NFE2L2/CNOT2/GPR158/CIT/RCAN1/GNAL/GFAP/GPR6/MKNK2/FGF14/PDYN/TNFRSF21/OS9/MTURN/IRS2/NTS/FGFR3/PTTG1IP/PLCH2/DDIT4…	139/374
GO:0023052	GO:BP	GO:0023052	signaling	3.16365538382484e-10	137	SCN1B/SEMA7A/MBP/NTNG1/CACNA2D1/MAP2K1/HTR2A/TIAM1/SEC14L1/VAV3/PVALB/ESRRG/FOS/LMO3/LIN7A/TIAM2/ADAM23/DIXDC1/GARNL3/KALRN/MEF2A/MINK1/IGFBP6/TRPV6/RGMB/HPGD/TENM2/UNC13C/GLRA3/CD44/NPTX1/SDCBP/RAB3B/SMYD2/ATRNL1/ADCYAP1/CADPS2/ASIC1/SLC2A8/ARL6IP5/RCAN2/PHLPP1/NFE2L2/CNOT2/GPR158/CIT/RCAN1/GNAL/GFAP/GPR6/MKNK2/FGF14/PDYN/TNFRSF21/OS9/MTURN/IRS2/NTS/FGFR3/PTTG1IP/PLCH2/DDIT4L/EPHB2/PPT1/RASGRF1/…	137/374
GO:0032989	GO:BP	GO:0032989	cellular component morphogenesis	9.32494819653771e-10	34	BTBD3/SCN1B/SEMA7A/TBR1/NTNG1/SEMA5B/KALRN/MEF2A/FHOD3/CNTNAP1/CD44/NPTX1/PAK6/TPM1/SHTN1/CNP/WDR1/EPHB2/CUX2/POU3F2/LRRK2/CD9/UGT8/KIF13B/KNDC1/SYT2/SLIT2/NEBL/SLITRK3/ELAVL4/ZNF365/SLITRK1/PLXNB1/DSCAM	34/374
GO:0048869	GO:BP	GO:0048869	cellular developmental process	1.35247872428616e-09	95	BTBD3/SCN1B/SEMA7A/TBR1/NTNG1/HTR2A/TIAM1/PLP1/BRINP3/TUBA8/FOS/LMO3/HSPA2/DIXDC1/SEMA5B/FAT3/KALRN/MEF2A/FHOD3/CNTNAP1/NPTX1/ETS2/PAK6/SDCBP/TPM1/ADCYAP1/NEGR1/CLCN2/SHTN1/NFE2L2/CNOT2/RCAN1/GFAP/CNP/TMEM215/MKNK2/TNFRSF21/MTURN/CAPN2/WDR1/EPHB2/RASGRF1/CUX2/PLAAT3/SAFB2/POU3F2/SEMA6D/SOX4/LRRK2/ARL4A/PCGF5/FBN2/EDNRB/TP53INP2/ARF6/PKDCC/NPNT/TFRC/ZADH2/CD9/UGT8/KIF13B/KNDC1/SYT2/CHD2/ASTN2/CASP…	95/374
GO:0030154	GO:BP	GO:0030154	cell differentiation	1.35247872428616e-09	95	BTBD3/SCN1B/SEMA7A/TBR1/NTNG1/HTR2A/TIAM1/PLP1/BRINP3/TUBA8/FOS/LMO3/HSPA2/DIXDC1/SEMA5B/FAT3/KALRN/MEF2A/FHOD3/CNTNAP1/NPTX1/ETS2/PAK6/SDCBP/TPM1/ADCYAP1/NEGR1/CLCN2/SHTN1/NFE2L2/CNOT2/RCAN1/GFAP/CNP/TMEM215/MKNK2/TNFRSF21/MTURN/CAPN2/WDR1/EPHB2/RASGRF1/CUX2/PLAAT3/SAFB2/POU3F2/SEMA6D/SOX4/LRRK2/ARL4A/PCGF5/FBN2/EDNRB/TP53INP2/ARF6/PKDCC/NPNT/TFRC/ZADH2/CD9/UGT8/KIF13B/KNDC1/SYT2/CHD2/ASTN2/CASP…	95/374
GO:0007399	GO:BP	GO:0007399	nervous system development	4.38606421759838e-09	64	BTBD3/SCN1B/SEMA7A/TBR1/NTNG1/PLP1/BRINP3/FOS/DIXDC1/SEMA5B/FAT3/KALRN/MEF2A/LOC100386406/CNTNAP1/NPTX1/PAK6/ADCYAP1/CLDN11/NEGR1/SHTN1/GFAP/CNP/TNFRSF21/IRS2/EPHB2/PPT1/RASGRF1/KCNA2/CUX2/POU3F2/SEMA6D/SOX4/LRRK2/HSPA5/EDNRB/ARF6/CD9/UGT8/KIF13B/KNDC1/SYT2/ASTN2/CASP3/SLIT2/ALDH5A1/ACSL6/SLITRK3/S1PR1/ELAVL4/HS6ST1/ZNF365/LOXL3/SLITRK1/PCDH10/PLXNB1/SCRT1/RORA/NRXN2/LNX2/BLOC1S6/DSCAM/ANXA2/SLC9…	64/374
GO:0048856	GO:BP	GO:0048856	anatomical structure development	6.72751502260132e-09	120	BTBD3/SCN1B/SEMA7A/TBR1/MBP/NTNG1/TIAM1/PLP1/BRINP3/TUBA8/FOS/LIN7A/HSPA2/DIXDC1/FHL1/SEMA5B/FAT3/KALRN/MEF2A/FJX1/HPGD/LOC100386406/FHOD3/CNTNAP1/TSHZ1/CD44/NPTX1/ETS2/PAK6/SDCBP/TPM1/ADCYAP1/CLDN11/NEGR1/CLCN2/DIPK2A/SHTN1/PHLPP1/NFE2L2/CNOT2/RCAN1/GFAP/CNP/TMEM215/MKNK2/TNFRSF21/MTURN/IRS2/QKI/CAPN2/WDR1/EPHB2/PPT1/RASGRF1/KCNA2/CUX2/PLAAT3/SAFB2/POU3F2/SEMA6D/SOX4/CDC42SE2/LRRK2/HSPA5/PCGF5/F…	120/374
GO:0032502	GO:BP	GO:0032502	developmental process	1.03642422870579e-08	125	BTBD3/SCN1B/SEMA7A/TBR1/MBP/NTNG1/HTR2A/TIAM1/PLP1/BRINP3/TUBA8/FOS/LMO3/LIN7A/HSPA2/DIXDC1/FHL1/SEMA5B/FAT3/KALRN/MEF2A/FJX1/HPGD/LOC100386406/FHOD3/CNTNAP1/TSHZ1/CD44/NPTX1/ETS2/PAK6/SDCBP/TPM1/ADCYAP1/CLDN11/NEGR1/CLCN2/DIPK2A/SHTN1/PHLPP1/NFE2L2/CNOT2/RCAN1/GFAP/CNP/TMEM215/MKNK2/TNFRSF21/MTURN/IRS2/QKI/CAPN2/WDR1/EPHB2/PPT1/RASGRF1/KCNA2/CUX2/PLAAT3/SAFB2/POU3F2/SEMA6D/SOX4/CDC42SE2/LRRK2/AR…	125/374
GO:0048518	GO:BP	GO:0048518	positive regulation of biological process	1.3811481351513e-08	130	SCN1B/SEMA7A/EDIL3/TBR1/MBP/MAP2K1/HTR2A/STARD4/TIAM1/SEC14L1/VAV3/PLP1/BRINP3/ESRRG/CDK2AP1/FOS/LMO3/TRPC3/HSPA2/DIXDC1/FHL1/KALRN/MEF2A/MINK1/IGFBP6/RGMB/CD44/IER5/ASPH/SLC2A13/ETS2/SDCBP/RAB3B/ADCYAP1/MORF4L1/NEGR1/GATM/ARL6IP5/DIPK2A/SHTN1/NFE2L2/CNOT2/CIT/GFAP/TNFRSF21/MTURN/IRS2/NTS/FGFR3/PTTG1IP/CITED4/WDR1/EPHB2/PPT1/CUX2/BACH1/POU3F2/HMBOX1/SEMA6D/SOX4/LRRK2/HSPA5/SPOCK2/APBB2/SLC38A2/NC…	130/374
GO:0048731	GO:BP	GO:0048731	system development	1.76282914836661e-08	89	BTBD3/SCN1B/SEMA7A/TBR1/NTNG1/PLP1/BRINP3/FOS/DIXDC1/SEMA5B/FAT3/KALRN/MEF2A/FJX1/HPGD/LOC100386406/FHOD3/CNTNAP1/CD44/NPTX1/PAK6/TPM1/ADCYAP1/CLDN11/NEGR1/CLCN2/DIPK2A/SHTN1/PHLPP1/GFAP/CNP/TMEM215/TNFRSF21/IRS2/EPHB2/PPT1/RASGRF1/KCNA2/CUX2/PLAAT3/SAFB2/POU3F2/SEMA6D/SOX4/LRRK2/HSPA5/FBN2/EDNRB/CALB1/ARF6/PKDCC/NPNT/TFRC/CD9/UGT8/KIF13B/KNDC1/SYT2/RHOBTB3/ASTN2/CASP3/ABI3BP/SLIT2/NEBL/ALDH5A1/A…	89/374
GO:0055085	GO:BP	GO:0055085	transmembrane transport	2.06085374156304e-08	57	SCN1B/CACNA2D1/HTR2A/KCNS2/TRPC3/HSPA2/KCNS1/SLC24A2/FHL1/MEF2A/TRPV6/KCNH7/TRPM3/KCNJ3/GLRA3/LOC100386406/KCNK12/SLC2A13/NIPAL2/ASIC1/SLC2A8/ARL6IP5/CLCN2/NFE2L2/GFAP/SLC35F4/IRS2/SLC20A2/EPHB2/RASGRF1/KCNA2/SLC1A6/LOC100401662/CACNG6/HSPA5/SLC38A2/TUSC3/EDNRB/NALCN/SLC44A2/GRIK4/SLC22A23/KCNQ5/KCNJ4/HCN2/KCNC2/KCNH8/KCNC1/KCNMB4/SCN2B/INSR/SCN3A/SFXN5/SLC17A6/GPR155/CORO7/SLC9A6	57/374
GO:0031175	GO:BP	GO:0031175	neuron projection development	2.30097610768556e-08	36	BTBD3/SCN1B/SEMA7A/TBR1/NTNG1/PLP1/SEMA5B/FAT3/KALRN/CNTNAP1/NPTX1/PAK6/ADCYAP1/NEGR1/SHTN1/GFAP/CNP/EPHB2/RASGRF1/CUX2/POU3F2/LRRK2/ARF6/UGT8/KIF13B/KNDC1/SYT2/SLIT2/SLITRK3/ELAVL4/ZNF365/SLITRK1/PLXNB1/BLOC1S6/DSCAM/SLC9A6	36/374
GO:0048699	GO:BP	GO:0048699	generation of neurons	3.16070644903055e-08	46	BTBD3/SCN1B/SEMA7A/TBR1/NTNG1/PLP1/BRINP3/DIXDC1/SEMA5B/FAT3/KALRN/CNTNAP1/NPTX1/PAK6/ADCYAP1/NEGR1/SHTN1/GFAP/CNP/EPHB2/RASGRF1/CUX2/POU3F2/SOX4/LRRK2/EDNRB/ARF6/UGT8/KIF13B/KNDC1/SYT2/ASTN2/SLIT2/ACSL6/SLITRK3/ELAVL4/HS6ST1/ZNF365/SLITRK1/PLXNB1/SCRT1/RORA/LNX2/BLOC1S6/DSCAM/SLC9A6	46/374
GO:0032501	GO:BP	GO:0032501	multicellular organismal process	3.6483093667574e-08	140	BTBD3/SCN1B/SEMA7A/TBR1/MBP/NTNG1/CACNA2D1/VAV3/PLP1/BRINP3/ESRRG/TUBA8/FOS/TRPC3/HSPA2/DIXDC1/SEMA5B/FAT3/KALRN/MEF2A/FJX1/TRPV6/HPGD/GLRA3/LOC100386406/FHOD3/CNTNAP1/TSHZ1/CD44/NPTX1/ETS2/PAK6/SDCBP/TPM1/ADCYAP1/CLDN11/ASIC1/NEGR1/GATM/ARL6IP5/CLCN2/DIPK2A/SHTN1/PHLPP1/NFE2L2/CNOT2/USH1C/RCAN1/GFAP/CNP/TMEM215/TNFRSF21/MTURN/IRS2/CAPN2/EPHB2/PPT1/RASGRF1/KCNA2/CUX2/PLAAT3/CHMP2B/SAFB2/POU3F2/SE…	140/374
GO:0007275	GO:BP	GO:0007275	multicellular organism development	3.83465770872039e-08	100	BTBD3/SCN1B/SEMA7A/TBR1/MBP/NTNG1/PLP1/BRINP3/FOS/DIXDC1/SEMA5B/FAT3/KALRN/MEF2A/FJX1/HPGD/LOC100386406/FHOD3/CNTNAP1/TSHZ1/CD44/NPTX1/ETS2/PAK6/TPM1/ADCYAP1/CLDN11/NEGR1/CLCN2/DIPK2A/SHTN1/PHLPP1/NFE2L2/CNOT2/GFAP/CNP/TMEM215/TNFRSF21/MTURN/IRS2/CAPN2/EPHB2/PPT1/RASGRF1/KCNA2/CUX2/PLAAT3/SAFB2/POU3F2/SEMA6D/SOX4/LRRK2/HSPA5/FBN2/EDNRB/CALB1/ARF6/PKDCC/NPNT/TFRC/CD9/UGT8/KIF13B/KNDC1/SYT2/RHOBTB3…	100/374
GO:0048522	GO:BP	GO:0048522	positive regulation of cellular process	5.51320854642171e-08	120	SCN1B/SEMA7A/EDIL3/TBR1/MBP/MAP2K1/HTR2A/STARD4/TIAM1/VAV3/PLP1/BRINP3/ESRRG/CDK2AP1/FOS/LMO3/TRPC3/HSPA2/DIXDC1/KALRN/MEF2A/MINK1/IGFBP6/RGMB/CD44/IER5/ETS2/SDCBP/ADCYAP1/MORF4L1/NEGR1/ARL6IP5/DIPK2A/SHTN1/NFE2L2/CNOT2/CIT/GFAP/MTURN/IRS2/NTS/FGFR3/CITED4/WDR1/EPHB2/PPT1/CUX2/BACH1/POU3F2/HMBOX1/SEMA6D/SOX4/LRRK2/HSPA5/SPOCK2/APBB2/SLC38A2/NCOA7/PCGF5/FBN2/TP53INP2/MAML3/CALB1/ARF6/PKDCC/NPNT/BI…	120/374
GO:0050896	GO:BP	GO:0050896	response to stimulus	7.54014328609161e-08	164	SEMA7A/TBR1/MBP/CACNA2D1/MAP2K1/HTR2A/TIAM1/SEC14L1/VAV3/PLP1/BRINP3/ESRRG/FOS/LMO3/TRPC3/HSPA2/TIAM2/ADAM23/DIXDC1/SEMA5B/GARNL3/MEF2A/MINK1/IGFBP6/TRPV6/RGMB/HPGD/TENM2/GLRA3/LOC100386406/CD44/NPTX1/IER5/SDCBP/SMYD2/TPM1/ATRNL1/ADCYAP1/LOC100894903/MORF4L1/ASIC1/SLC2A8/GATM/ARL6IP5/RCAN2/PHLPP1/NFE2L2/PAM/CNOT2/GPR158/CIT/RCAN1/GNAL/GFAP/CNP/GPR6/MKNK2/FGF14/PDYN/TNFRSF21/OS9/MTURN/IRS2/NTS/FGF…	164/374
GO:0120039	GO:BP	GO:0120039	plasma membrane bounded cell projection morphogenesis	1.22282626798878e-07	28	BTBD3/SCN1B/SEMA7A/TBR1/NTNG1/SEMA5B/KALRN/CNTNAP1/CD44/NPTX1/PAK6/SHTN1/CNP/EPHB2/CUX2/POU3F2/LRRK2/UGT8/KIF13B/KNDC1/SYT2/SLIT2/SLITRK3/ELAVL4/ZNF365/SLITRK1/PLXNB1/DSCAM	28/374
GO:0048858	GO:BP	GO:0048858	cell projection morphogenesis	1.38683577784498e-07	28	BTBD3/SCN1B/SEMA7A/TBR1/NTNG1/SEMA5B/KALRN/CNTNAP1/CD44/NPTX1/PAK6/SHTN1/CNP/EPHB2/CUX2/POU3F2/LRRK2/UGT8/KIF13B/KNDC1/SYT2/SLIT2/SLITRK3/ELAVL4/ZNF365/SLITRK1/PLXNB1/DSCAM	28/374
GO:0022008	GO:BP	GO:0022008	neurogenesis	1.67536087783466e-07	49	BTBD3/SCN1B/SEMA7A/TBR1/NTNG1/PLP1/BRINP3/DIXDC1/SEMA5B/FAT3/KALRN/CNTNAP1/NPTX1/PAK6/ADCYAP1/NEGR1/SHTN1/GFAP/CNP/TNFRSF21/EPHB2/RASGRF1/CUX2/POU3F2/SOX4/LRRK2/EDNRB/ARF6/CD9/UGT8/KIF13B/KNDC1/SYT2/ASTN2/SLIT2/ACSL6/SLITRK3/ELAVL4/HS6ST1/ZNF365/SLITRK1/PLXNB1/SCRT1/RORA/LNX2/BLOC1S6/DSCAM/ANXA2/SLC9A6	49/374
GO:0030182	GO:BP	GO:0030182	neuron differentiation	1.79214822677014e-07	43	BTBD3/SCN1B/SEMA7A/TBR1/NTNG1/PLP1/BRINP3/DIXDC1/SEMA5B/FAT3/KALRN/CNTNAP1/NPTX1/PAK6/ADCYAP1/NEGR1/SHTN1/GFAP/CNP/EPHB2/RASGRF1/CUX2/POU3F2/SOX4/LRRK2/EDNRB/ARF6/UGT8/KIF13B/KNDC1/SYT2/SLIT2/SLITRK3/ELAVL4/HS6ST1/ZNF365/SLITRK1/PLXNB1/RORA/LNX2/BLOC1S6/DSCAM/SLC9A6	43/374
GO:0048666	GO:BP	GO:0048666	neuron development	1.9475687816838e-07	38	BTBD3/SCN1B/SEMA7A/TBR1/NTNG1/PLP1/SEMA5B/FAT3/KALRN/CNTNAP1/NPTX1/PAK6/ADCYAP1/NEGR1/SHTN1/GFAP/CNP/EPHB2/RASGRF1/CUX2/POU3F2/LRRK2/EDNRB/ARF6/UGT8/KIF13B/KNDC1/SYT2/SLIT2/SLITRK3/ELAVL4/HS6ST1/ZNF365/SLITRK1/PLXNB1/BLOC1S6/DSCAM/SLC9A6	38/374
GO:0048812	GO:BP	GO:0048812	neuron projection morphogenesis	2.57572257023231e-07	27	BTBD3/SCN1B/SEMA7A/TBR1/NTNG1/SEMA5B/KALRN/CNTNAP1/NPTX1/PAK6/SHTN1/CNP/EPHB2/CUX2/POU3F2/LRRK2/UGT8/KIF13B/KNDC1/SYT2/SLIT2/SLITRK3/ELAVL4/ZNF365/SLITRK1/PLXNB1/DSCAM	27/374
GO:0032990	GO:BP	GO:0032990	cell part morphogenesis	4.39384255865634e-07	28	BTBD3/SCN1B/SEMA7A/TBR1/NTNG1/SEMA5B/KALRN/CNTNAP1/CD44/NPTX1/PAK6/SHTN1/CNP/EPHB2/CUX2/POU3F2/LRRK2/UGT8/KIF13B/KNDC1/SYT2/SLIT2/SLITRK3/ELAVL4/ZNF365/SLITRK1/PLXNB1/DSCAM	28/374
GO:0034762	GO:BP	GO:0034762	regulation of transmembrane transport	1.0105948082707e-06	26	SCN1B/CACNA2D1/KCNS2/TRPC3/HSPA2/KCNS1/FHL1/MEF2A/KCNH7/KCNJ3/LOC100386406/KCNK12/ARL6IP5/NFE2L2/IRS2/EPHB2/RASGRF1/KCNA2/CACNG6/KCNJ4/KCNC2/KCNH8/KCNC1/SCN2B/INSR/SCN3A	26/374
GO:0035556	GO:BP	GO:0035556	intracellular signal transduction	1.02886002318202e-06	67	SEMA7A/MBP/MAP2K1/HTR2A/TIAM1/VAV3/FOS/LMO3/TIAM2/GARNL3/MEF2A/MINK1/IGFBP6/CD44/SDCBP/SMYD2/ADCYAP1/ARL6IP5/RCAN2/PHLPP1/NFE2L2/CIT/RCAN1/MKNK2/MTURN/NTS/FGFR3/PTTG1IP/PLCH2/EPHB2/RASGRF1/SOX4/EIF4EBP2/CDC42SE2/LRRK2/NCEH1/CYTH1/EDNRB/ARF6/NPNT/TFRC/F7/KNDC1/ADCY5/RELL2/CASP3/SLIT2/ASB13/RALGPS1/RASGEF1A/PREX1/MAGI2/PDE3A/INSR/PTGS2/NPRL3/S100A13/TLK1/RASGRP1/RORA/RELL1/PLCH1/DAPK1/IVNS1ABP/GPR1…	67/374
GO:0065008	GO:BP	GO:0065008	regulation of biological quality	1.10364679014646e-06	68	SCN1B/SEMA7A/ASGR2/CACNA2D1/VAV3/TRPC3/LIN7A/PCSK1/FHL1/RIMS3/KALRN/TRPV6/GLRA3/LOC100386406/FHOD3/CNTNAP1/RAB3B/TPM1/CADPS2/ASIC1/ARL6IP5/CLCN2/NFE2L2/GFAP/GPR6/IRS2/WDR1/EPHB2/PPT1/RASGRF1/CUX2/SLC1A6/SOX4/EIF4EBP2/CDC42SE2/LRRK2/EDNRB/DGKB/TBRG1/CALB1/ARF6/GRIK4/CTSA/F7/CD9/HCN2/ADCY5/RASL10B/CASP3/SLIT2/SLITRK3/KCNMB4/ELAVL4/PDE3A/SCN2B/SLITRK1/PTGS2/GOLGA7/NAPB/PLXNB1/DHRS7/NRXN2/BLOC1S6/DSC…	68/374
GO:0048468	GO:BP	GO:0048468	cell development	1.13107715104749e-06	67	BTBD3/SCN1B/SEMA7A/TBR1/NTNG1/PLP1/TUBA8/FOS/HSPA2/SEMA5B/FAT3/KALRN/MEF2A/FHOD3/CNTNAP1/NPTX1/PAK6/TPM1/ADCYAP1/NEGR1/SHTN1/NFE2L2/RCAN1/GFAP/CNP/TMEM215/MKNK2/MTURN/WDR1/EPHB2/RASGRF1/CUX2/POU3F2/SOX4/LRRK2/PCGF5/EDNRB/ARF6/TFRC/UGT8/KIF13B/KNDC1/SYT2/CHD2/CASP3/SLIT2/NEBL/SLITRK3/CAMK4/KLF13/PREX1/AIRE/ELAVL4/PDE3A/HS6ST1/ZNF365/LOXL3/SLITRK1/PLXNB1/L3MBTL3/NRARP/RASGRP1/RORA/BLOC1S6/DSCAM/ANX…	67/374
GO:1901564	GO:BP	GO:1901564	organonitrogen compound metabolic process	1.3755009060495e-06	142	SEMA7A/ADAMTS17/ASGR2/CAMK2G/MBP/MMP17/MAP2K1/HTR2A/CDK2AP1/HR/HSPA2/BACE2/PCSK1/GALNT14/ADAM23/HS3ST1/KALRN/MINK1/CD44/GLDC/ASPH/SLC2A13/NECAB3/PAK6/SDCBP/TECR/SMYD2/CDKL2/ADCYAP1/GCSH/MORF4L1/GATM/RNF144A/ARL6IP5/RUSC1/ELOVL4/DIPK2A/B3GALT1/NFE2L2/BZW2/PAM/CIT/RCAN1/GFAP/MKNK2/ST8SIA4/OS9/FGFR3/CAPN2/PIM3/PTTG1IP/ODC1/GALNT2/EPHB2/PPT1/PLAAT3/HECW2/CHMP2B/LOC100401662/RHBDL1/GLS/SOX4/EIF4EBP2/P…	142/374
GO:0050890	GO:BP	GO:0050890	cognition	1.51726208174703e-06	19	TBR1/KALRN/PAK6/ASIC1/GATM/ARL6IP5/RCAN1/EPHB2/PPT1/CUX2/CHMP2B/EIF4EBP2/TUSC3/CALB1/CAMK4/ELAVL4/NRXN2/NPTX2/GPR155	19/374
GO:0030001	GO:BP	GO:0030001	metal ion transport	2.53678294308812e-06	35	SCN1B/CACNA2D1/HTR2A/KCNS2/TRPC3/HSPA2/KCNS1/SLC24A2/FHL1/TRPV6/KCNH7/TRPM3/KCNJ3/LOC100386406/KCNK12/NIPAL2/ASIC1/SLC20A2/KCNA2/CACNG6/TUSC3/EDNRB/NALCN/TFRC/KCNQ5/KCNJ4/HCN2/KCNC2/KCNH8/KCNC1/KCNMB4/SCN2B/SCN3A/PER1/SLC9A6	35/374
GO:0010975	GO:BP	GO:0010975	regulation of neuron projection development	3.74780128067068e-06	20	SCN1B/SEMA7A/TBR1/NTNG1/FAT3/KALRN/NEGR1/GFAP/EPHB2/CUX2/POU3F2/LRRK2/ARF6/KIF13B/KNDC1/SLIT2/ZNF365/SLITRK1/PLXNB1/DSCAM	20/374
GO:0098662	GO:BP	GO:0098662	inorganic cation transmembrane transport	5.66338620074799e-06	34	SCN1B/CACNA2D1/HTR2A/KCNS2/TRPC3/HSPA2/KCNS1/SLC24A2/FHL1/TRPV6/KCNH7/TRPM3/KCNJ3/LOC100386406/KCNK12/NIPAL2/ASIC1/SLC20A2/KCNA2/LOC100401662/CACNG6/TUSC3/EDNRB/NALCN/KCNQ5/KCNJ4/HCN2/KCNC2/KCNH8/KCNC1/KCNMB4/SCN2B/SCN3A/SLC9A6	34/374
GO:0009653	GO:BP	GO:0009653	anatomical structure morphogenesis	6.50059911073694e-06	66	BTBD3/SCN1B/SEMA7A/TBR1/MBP/NTNG1/SEMA5B/FAT3/KALRN/MEF2A/FJX1/HPGD/FHOD3/CNTNAP1/TSHZ1/CD44/NPTX1/ETS2/PAK6/TPM1/SHTN1/CNOT2/CNP/TMEM215/CAPN2/WDR1/EPHB2/KCNA2/CUX2/POU3F2/SOX4/CDC42SE2/LRRK2/HSPA5/FBN2/CALB1/PKDCC/NPNT/TFRC/CD9/UGT8/KIF13B/KNDC1/SYT2/ASTN2/CASP3/SLIT2/NEBL/SLITRK3/S1PR1/AIRE/ELAVL4/HS6ST1/ZNF365/INSR/SLITRK1/NPRL3/PLXNB1/NRARP/RORA/EFNA5/FMNL2/DSCAM/ANXA2/ENTPD4/PAK1	66/374
GO:0034220	GO:BP	GO:0034220	monoatomic ion transmembrane transport	7.03069736749192e-06	39	SCN1B/CACNA2D1/HTR2A/KCNS2/TRPC3/HSPA2/KCNS1/SLC24A2/FHL1/TRPV6/KCNH7/TRPM3/KCNJ3/GLRA3/LOC100386406/KCNK12/NIPAL2/ASIC1/CLCN2/SLC20A2/EPHB2/KCNA2/LOC100401662/CACNG6/TUSC3/EDNRB/NALCN/GRIK4/KCNQ5/KCNJ4/HCN2/KCNC2/KCNH8/KCNC1/KCNMB4/SCN2B/SCN3A/SFXN5/SLC9A6	39/374
GO:0000902	GO:BP	GO:0000902	cell morphogenesis	7.08779155119214e-06	33	BTBD3/SCN1B/SEMA7A/TBR1/NTNG1/SEMA5B/KALRN/CNTNAP1/CD44/NPTX1/PAK6/TPM1/SHTN1/CNP/WDR1/EPHB2/CUX2/POU3F2/CDC42SE2/LRRK2/UGT8/KIF13B/KNDC1/SYT2/SLIT2/SLITRK3/ELAVL4/ZNF365/SLITRK1/PLXNB1/EFNA5/FMNL2/DSCAM	33/374
GO:0098655	GO:BP	GO:0098655	monoatomic cation transmembrane transport	1.07719004923707e-05	34	SCN1B/CACNA2D1/HTR2A/KCNS2/TRPC3/HSPA2/KCNS1/SLC24A2/FHL1/TRPV6/KCNH7/TRPM3/KCNJ3/LOC100386406/KCNK12/NIPAL2/ASIC1/SLC20A2/KCNA2/LOC100401662/CACNG6/TUSC3/EDNRB/NALCN/KCNQ5/KCNJ4/HCN2/KCNC2/KCNH8/KCNC1/KCNMB4/SCN2B/SCN3A/SLC9A6	34/374
GO:0098916	GO:BP	GO:0098916	anterograde trans-synaptic signaling	1.50263598141169e-05	25	NTNG1/PVALB/LIN7A/UNC13C/GLRA3/NPTX1/RAB3B/CADPS2/ASIC1/GFAP/PDYN/EPHB2/PPT1/RASGRF1/CUX2/GLS/EIF4EBP2/LRRK2/DGKB/CALB1/UNC13B/SLITRK3/NAPB/NRXN2/NPTX2	25/374
GO:0007268	GO:BP	GO:0007268	chemical synaptic transmission	1.50263598141169e-05	25	NTNG1/PVALB/LIN7A/UNC13C/GLRA3/NPTX1/RAB3B/CADPS2/ASIC1/GFAP/PDYN/EPHB2/PPT1/RASGRF1/CUX2/GLS/EIF4EBP2/LRRK2/DGKB/CALB1/UNC13B/SLITRK3/NAPB/NRXN2/NPTX2	25/374
GO:0098660	GO:BP	GO:0098660	inorganic ion transmembrane transport	1.6792784548924e-05	36	SCN1B/CACNA2D1/HTR2A/KCNS2/TRPC3/HSPA2/KCNS1/SLC24A2/FHL1/TRPV6/KCNH7/TRPM3/KCNJ3/GLRA3/LOC100386406/KCNK12/NIPAL2/ASIC1/CLCN2/SLC20A2/KCNA2/LOC100401662/CACNG6/TUSC3/EDNRB/NALCN/KCNQ5/KCNJ4/HCN2/KCNC2/KCNH8/KCNC1/KCNMB4/SCN2B/SCN3A/SLC9A6	36/374
GO:0023051	GO:BP	GO:0023051	regulation of signaling	1.89051485028983e-05	76	SEMA7A/NTNG1/MAP2K1/HTR2A/SEC14L1/LMO3/DIXDC1/GARNL3/KALRN/MINK1/IGFBP6/CD44/NPTX1/SDCBP/SMYD2/ADCYAP1/ASIC1/ARL6IP5/PHLPP1/NFE2L2/CNOT2/CIT/RCAN1/GFAP/MTURN/IRS2/NTS/FGFR3/PTTG1IP/DDIT4L/EPHB2/RASGRF1/CUX2/SAFB2/SOX4/EIF4EBP2/CDC42SE2/LRRK2/HSPA5/CYTH1/FBN2/DGKB/CALB1/ARF6/NPNT/TFRC/F7/ADCY5/RELL2/RASL10B/SLIT2/RALGPS1/RASGEF1A/MAGI2/PDE3A/INSR/LOXL3/PTGS2/NPRL3/S100A13/NRARP/RASGRP1/RORA/NRXN2/…	76/374
GO:0051716	GO:BP	GO:0051716	cellular response to stimulus	1.95124772880428e-05	138	SEMA7A/MBP/CACNA2D1/MAP2K1/HTR2A/TIAM1/SEC14L1/VAV3/BRINP3/ESRRG/FOS/LMO3/TIAM2/ADAM23/DIXDC1/GARNL3/MEF2A/MINK1/IGFBP6/RGMB/HPGD/TENM2/GLRA3/CD44/NPTX1/IER5/SDCBP/SMYD2/TPM1/ATRNL1/ADCYAP1/LOC100894903/MORF4L1/ASIC1/SLC2A8/ARL6IP5/RCAN2/PHLPP1/NFE2L2/CNOT2/GPR158/CIT/RCAN1/GNAL/GFAP/GPR6/MKNK2/FGF14/PDYN/TNFRSF21/OS9/MTURN/IRS2/NTS/FGFR3/CAPN2/PTTG1IP/PLCH2/DDIT4L/EPHB2/RASGRF1/CUX2/CDH6/BACH1/S…	138/374
GO:0099537	GO:BP	GO:0099537	trans-synaptic signaling	1.96347212741339e-05	25	NTNG1/PVALB/LIN7A/UNC13C/GLRA3/NPTX1/RAB3B/CADPS2/ASIC1/GFAP/PDYN/EPHB2/PPT1/RASGRF1/CUX2/GLS/EIF4EBP2/LRRK2/DGKB/CALB1/UNC13B/SLITRK3/NAPB/NRXN2/NPTX2	25/374
GO:0051049	GO:BP	GO:0051049	regulation of transport	2.5293483221435e-05	46	SCN1B/CACNA2D1/KCNS2/TRPC3/HSPA2/KCNS1/FHL1/KALRN/MEF2A/KCNH7/KCNJ3/LOC100386406/KCNK12/SDCBP/RAB3B/ASIC1/ARL6IP5/NFE2L2/GFAP/OS9/IRS2/EPHB2/PPT1/RASGRF1/KCNA2/CACNG6/SOX4/LRRK2/LGI3/ARF6/PKDCC/BICD1/KCNJ4/ADCY5/RASL10B/KCNC2/KCNH8/KCNC1/ACSL3/MAGI2/SCN2B/INSR/SCN3A/ANXA2/ATP9A/PER1	46/374
GO:0007165	GO:BP	GO:0007165	signal transduction	2.69651116278466e-05	116	SEMA7A/MBP/MAP2K1/HTR2A/TIAM1/SEC14L1/VAV3/ESRRG/FOS/LMO3/TIAM2/ADAM23/DIXDC1/GARNL3/MEF2A/MINK1/IGFBP6/RGMB/HPGD/TENM2/GLRA3/CD44/NPTX1/SDCBP/SMYD2/ATRNL1/ADCYAP1/SLC2A8/ARL6IP5/RCAN2/PHLPP1/NFE2L2/CNOT2/GPR158/CIT/RCAN1/GNAL/GPR6/MKNK2/FGF14/PDYN/TNFRSF21/OS9/MTURN/IRS2/NTS/FGFR3/PTTG1IP/PLCH2/DDIT4L/EPHB2/RASGRF1/CUX2/CDH6/SAFB2/SOX4/EIF4EBP2/CDC42SE2/LRRK2/PTPRK/HSPA5/NCEH1/CYTH1/HTR5A/FBN2/E…	116/374
GO:0007611	GO:BP	GO:0007611	learning or memory	3.01781714141361e-05	16	TBR1/KALRN/PAK6/ASIC1/GATM/ARL6IP5/RCAN1/EPHB2/PPT1/CUX2/EIF4EBP2/CALB1/CAMK4/ELAVL4/NRXN2/NPTX2	16/374
GO:0071805	GO:BP	GO:0071805	potassium ion transmembrane transport	3.01781714141361e-05	16	KCNS2/KCNS1/SLC24A2/FHL1/KCNH7/KCNJ3/KCNK12/KCNA2/KCNQ5/KCNJ4/HCN2/KCNC2/KCNH8/KCNC1/KCNMB4/SLC9A6	16/374
GO:0048667	GO:BP	GO:0048667	cell morphogenesis involved in neuron differentiation	3.05774495561591e-05	23	BTBD3/SCN1B/SEMA7A/TBR1/NTNG1/SEMA5B/KALRN/CNTNAP1/NPTX1/CNP/EPHB2/CUX2/POU3F2/LRRK2/KIF13B/KNDC1/SLIT2/SLITRK3/ELAVL4/ZNF365/SLITRK1/PLXNB1/DSCAM	23/374
GO:1902531	GO:BP	GO:1902531	regulation of intracellular signal transduction	3.1657298118224e-05	46	SEMA7A/MAP2K1/HTR2A/LMO3/GARNL3/MINK1/IGFBP6/CD44/SMYD2/ADCYAP1/ARL6IP5/PHLPP1/NFE2L2/CIT/RCAN1/MTURN/NTS/FGFR3/PTTG1IP/EPHB2/RASGRF1/SOX4/CDC42SE2/LRRK2/CYTH1/ARF6/NPNT/TFRC/F7/RELL2/SLIT2/RALGPS1/RASGEF1A/MAGI2/PDE3A/INSR/PTGS2/NPRL3/S100A13/RASGRP1/RORA/RELL1/DAPK1/IVNS1ABP/PAK1/CORO7	46/374
GO:0010646	GO:BP	GO:0010646	regulation of cell communication	4.245433907154e-05	75	SEMA7A/NTNG1/MAP2K1/HTR2A/SEC14L1/LMO3/DIXDC1/GARNL3/KALRN/MINK1/IGFBP6/CD44/NPTX1/SDCBP/SMYD2/ADCYAP1/ASIC1/ARL6IP5/PHLPP1/NFE2L2/CNOT2/CIT/RCAN1/GFAP/MTURN/IRS2/NTS/FGFR3/PTTG1IP/DDIT4L/EPHB2/RASGRF1/CUX2/SAFB2/SOX4/EIF4EBP2/CDC42SE2/LRRK2/HSPA5/CYTH1/FBN2/DGKB/CALB1/ARF6/NPNT/TFRC/F7/ADCY5/RELL2/RASL10B/SLIT2/RALGPS1/RASGEF1A/MAGI2/PDE3A/INSR/LOXL3/PTGS2/NPRL3/S100A13/NRARP/RASGRP1/RORA/NRXN2/…	75/374
GO:0099536	GO:BP	GO:0099536	synaptic signaling	4.26031378354684e-05	25	NTNG1/PVALB/LIN7A/UNC13C/GLRA3/NPTX1/RAB3B/CADPS2/ASIC1/GFAP/PDYN/EPHB2/PPT1/RASGRF1/CUX2/GLS/EIF4EBP2/LRRK2/DGKB/CALB1/UNC13B/SLITRK3/NAPB/NRXN2/NPTX2	25/374
GO:0006812	GO:BP	GO:0006812	monoatomic cation transport	0.000104078	36	SCN1B/CACNA2D1/HTR2A/KCNS2/TRPC3/HSPA2/KCNS1/SLC24A2/FHL1/TRPV6/KCNH7/TRPM3/KCNJ3/LOC100386406/KCNK12/NIPAL2/ASIC1/SLC20A2/KCNA2/LOC100401662/CACNG6/TUSC3/EDNRB/NALCN/TFRC/KCNQ5/KCNJ4/HCN2/KCNC2/KCNH8/KCNC1/KCNMB4/SCN2B/SCN3A/PER1/SLC9A6	36/374
GO:0006813	GO:BP	GO:0006813	potassium ion transport	0.000109324	16	KCNS2/KCNS1/SLC24A2/FHL1/KCNH7/KCNJ3/KCNK12/KCNA2/KCNQ5/KCNJ4/HCN2/KCNC2/KCNH8/KCNC1/KCNMB4/SLC9A6	16/374
GO:0006811	GO:BP	GO:0006811	monoatomic ion transport	0.000111724	41	SCN1B/CACNA2D1/HTR2A/KCNS2/TRPC3/HSPA2/KCNS1/SLC24A2/FHL1/TRPV6/KCNH7/TRPM3/KCNJ3/GLRA3/LOC100386406/KCNK12/NIPAL2/ASIC1/CLCN2/SLC20A2/EPHB2/KCNA2/LOC100401662/CACNG6/TUSC3/EDNRB/NALCN/GRIK4/TFRC/KCNQ5/KCNJ4/HCN2/KCNC2/KCNH8/KCNC1/KCNMB4/SCN2B/SCN3A/SFXN5/PER1/SLC9A6	41/374
GO:0036211	GO:BP	GO:0036211	protein modification process	0.000115732	82	SEMA7A/CAMK2G/MAP2K1/HTR2A/CDK2AP1/HR/HSPA2/GALNT14/KALRN/MINK1/CD44/ASPH/PAK6/SMYD2/CDKL2/ADCYAP1/MORF4L1/RNF144A/RUSC1/DIPK2A/B3GALT1/NFE2L2/CIT/RCAN1/MKNK2/ST8SIA4/OS9/FGFR3/PIM3/PTTG1IP/GALNT2/EPHB2/PPT1/HECW2/SOX4/LRRK2/PTPRK/HSPA5/SPOCK2/NCEH1/TUSC3/NCOA7/PCGF5/PTP4A2/GALNT1/PKDCC/TFRC/RNF157/ASPHD2/DCUN1D4/KNDC1/RNF141/CASP3/SLIT2/ASB13/CHORDC1/HIPK3/CAMK4/SETD7/GALNT18/PPP6R1/MAGI2/INSR/L…	82/374
GO:0034765	GO:BP	GO:0034765	regulation of monoatomic ion transmembrane transport	0.000117452	20	SCN1B/CACNA2D1/KCNS2/TRPC3/HSPA2/KCNS1/FHL1/KCNH7/KCNJ3/LOC100386406/KCNK12/EPHB2/KCNA2/CACNG6/KCNJ4/KCNC2/KCNH8/KCNC1/SCN2B/SCN3A	20/374
GO:0050793	GO:BP	GO:0050793	regulation of developmental process	0.000152398	58	SEMA7A/NTNG1/HTR2A/TIAM1/BRINP3/FOS/LMO3/DIXDC1/FAT3/KALRN/CNTNAP1/CD44/SDCBP/TPM1/NFE2L2/CNOT2/GFAP/TMEM215/TNFRSF21/MTURN/WDR1/EPHB2/CUX2/PLAAT3/POU3F2/SOX4/CDC42SE2/LRRK2/FBN2/EDNRB/ARF6/PKDCC/NPNT/TFRC/ZADH2/KIF13B/KNDC1/SYT2/ABI3BP/SLITRK3/S1PR1/KLF13/PDE3A/ZNF365/INSR/LOXL3/SLITRK1/PTGS2/PLXNB1/NRARP/RASGRP1/RORA/EFNA5/FMNL2/BLOC1S6/DSCAM/ANXA2/ENTPD4	58/374
GO:0007155	GO:BP	GO:0007155	cell adhesion	0.000155082	40	EDIL3/MBP/NTNG1/TIAM1/FAT3/MINK1/RGMB/CNTNAP1/CD44/CLDN11/NEGR1/TNFRSF21/EPHB2/CDH6/CDH18/SOX4/PTPRK/SPOCK2/PCDH7/CYTH1/NPNT/TFRC/SPON1/CD9/RELL2/CASP3/EPDR1/ABI3BP/SLITRK3/S1PR1/PREX1/LOXL3/SLITRK1/PCDH10/PLXNB1/NRARP/RADIL/RASGRP1/EFNA5/DSCAM	40/374
GO:0007610	GO:BP	GO:0007610	behavior	0.000155916	25	TBR1/KALRN/LOC100386406/PAK6/ASIC1/NEGR1/GATM/ARL6IP5/RCAN1/CNP/EPHB2/PPT1/KCNA2/CUX2/GLS/EIF4EBP2/LRRK2/CALB1/ADCY5/CAMK4/ELAVL4/SCN3A/NRXN2/DSCAM/NPTX2	25/374
GO:0006836	GO:BP	GO:0006836	neurotransmitter transport	0.000167522	12	LIN7A/CPLX1/RAB3B/CADPS2/ASIC1/GFAP/PPT1/SLC1A6/LRRK2/NAPB/NRXN2/SLC17A6	12/374
GO:0008283	GO:BP	GO:0008283	cell population proliferation	0.000179292	69	BTBD3/SCN1B/SEMA7A/TBR1/NTNG1/MAP2K1/TIAM1/VAV3/PLP1/DIXDC1/SEMA5B/FAT3/KALRN/CNTNAP1/CD44/NPTX1/IER5/PAK6/SDCBP/SMYD2/TPM1/ADCYAP1/NEGR1/DIPK2A/SHTN1/GFAP/CNP/TNFRSF21/IRS2/FGFR3/EPHB2/RASGRF1/CUX2/POU3F2/SOX4/LRRK2/PTPRK/TBRG1/ARF6/TFRC/CD9/SCRG1/UGT8/KIF13B/KNDC1/SYT2/CASP3/ABI3BP/SLIT2/ACSL6/SLITRK3/S1PR1/KLF13/ELAVL4/ZNF365/INSR/SLITRK1/PTGS2/PLXNB1/NRARP/RASGRP1/RORA/LNX2/BLOC1S6/DSCAM/CTTN…	69/374
GO:0032879	GO:BP	GO:0032879	regulation of localization	0.000217675	51	SCN1B/CACNA2D1/HTR2A/KCNS2/TRPC3/HSPA2/KCNS1/FHL1/KALRN/MEF2A/KCNH7/KCNJ3/LOC100386406/KCNK12/SDCBP/RAB3B/ADCYAP1/ASIC1/ARL6IP5/NFE2L2/GFAP/OS9/IRS2/EPHB2/PPT1/RASGRF1/KCNA2/CACNG6/SOX4/LRRK2/LGI3/TP53INP2/ARF6/PKDCC/BICD1/TFRC/KCNJ4/ADCY5/RASL10B/ASTN2/KCNC2/KCNH8/KCNC1/ACSL3/MAGI2/SCN2B/INSR/SCN3A/ANXA2/ATP9A/PER1	51/374
GO:0019538	GO:BP	GO:0019538	protein metabolic process	0.000223848	120	SEMA7A/ADAMTS17/ASGR2/CAMK2G/MBP/MMP17/MAP2K1/HTR2A/CDK2AP1/HR/HSPA2/BACE2/PCSK1/GALNT14/ADAM23/HS3ST1/KALRN/MINK1/CD44/ASPH/SLC2A13/NECAB3/PAK6/SDCBP/SMYD2/CDKL2/ADCYAP1/MORF4L1/RNF144A/ARL6IP5/RUSC1/DIPK2A/B3GALT1/NFE2L2/BZW2/CIT/RCAN1/GFAP/MKNK2/ST8SIA4/OS9/FGFR3/CAPN2/PIM3/PTTG1IP/GALNT2/EPHB2/PPT1/HECW2/CHMP2B/RHBDL1/SOX4/EIF4EBP2/LRRK2/PTPRK/HSPA5/SPOCK2/NCEH1/TUSC3/NCOA7/PCGF5/EDNRB/TP53IN…	120/374
GO:0032940	GO:BP	GO:0032940	secretion by cell	0.000429094	26	LIN7A/CPLX1/RIMS3/KALRN/TRPV6/UNC13C/SDCBP/CADPS2/ASIC1/IRS2/PPT1/KCNA2/SOX4/LRRK2/LGI3/EDNRB/ARF6/ADCY5/RASL10B/UNC13B/PTGS2/NAPB/RASGRP1/NRXN2/BLOC1S6/ATP9A	26/374
GO:0080090	GO:BP	GO:0080090	regulation of primary metabolic process	0.000456745	110	SEMA7A/CUX1/TBR1/MBP/MAP2K1/CITED2/HTR2A/STARD4/ESRRG/CDK2AP1/FOS/HSPA2/BACE2/MEF2A/RGMB/HPGD/CD44/IER5/KCNIP3/ASPH/SLC2A13/NECAB3/ETS2/SDCBP/SMYD2/ADCYAP1/MORF4L1/ARL6IP5/CLCN2/DIPK2A/NFE2L2/BZW2/CNOT2/RCAN1/GFAP/MTURN/IRS2/NTS/FGFR3/PTTG1IP/CITED4/ARID3B/KHDRBS2/EPHB2/CUX2/BACH1/POU3F2/HMBOX1/SOX4/EIF4EBP2/LRRK2/PTPRK/HSPA5/APBB2/SLC38A2/NCOA7/PCGF5/EDNRB/TP53INP2/MAML3/MTARC2/NPNT/TFRC/PAIP2B/…	110/374
GO:0009966	GO:BP	GO:0009966	regulation of signal transduction	0.000988245	65	SEMA7A/MAP2K1/HTR2A/SEC14L1/LMO3/DIXDC1/GARNL3/MINK1/IGFBP6/CD44/NPTX1/SDCBP/SMYD2/ADCYAP1/ARL6IP5/PHLPP1/NFE2L2/CNOT2/CIT/RCAN1/MTURN/NTS/FGFR3/PTTG1IP/DDIT4L/EPHB2/RASGRF1/CUX2/SAFB2/SOX4/CDC42SE2/LRRK2/HSPA5/CYTH1/FBN2/ARF6/NPNT/TFRC/F7/RELL2/SLIT2/RALGPS1/RASGEF1A/MAGI2/PDE3A/INSR/LOXL3/PTGS2/NPRL3/S100A13/NRARP/RASGRP1/RORA/NRXN2/RELL1/DAPK1/NPTX2/CTTN/IVNS1ABP/PER1/STMP1/PAK1/CORO7/SLC9A6/T…	65/374
GO:0007267	GO:BP	GO:0007267	cell-cell signaling	0.00106278	39	SCN1B/NTNG1/CACNA2D1/PVALB/LIN7A/DIXDC1/KALRN/TRPV6/UNC13C/GLRA3/NPTX1/RAB3B/CADPS2/ASIC1/GFAP/PDYN/IRS2/EPHB2/PPT1/RASGRF1/KCNA2/CUX2/GLS/SOX4/EIF4EBP2/LRRK2/EDNRB/DGKB/CALB1/ADCY5/RASL10B/UNC13B/SLITRK3/PTGS2/NAPB/NRARP/NRXN2/NPTX2/TNKS2	39/374
GO:0048583	GO:BP	GO:0048583	regulation of response to stimulus	0.00113246	79	SEMA7A/TBR1/MAP2K1/HTR2A/SEC14L1/VAV3/LMO3/TRPC3/DIXDC1/GARNL3/MEF2A/MINK1/IGFBP6/CD44/NPTX1/IER5/SDCBP/SMYD2/ADCYAP1/MORF4L1/ARL6IP5/PHLPP1/NFE2L2/CNOT2/CIT/RCAN1/TNFRSF21/MTURN/NTS/FGFR3/PTTG1IP/DDIT4L/EPHB2/RASGRF1/CUX2/SAFB2/SOX4/CDC42SE2/LRRK2/HSPA5/SLC38A2/CYTH1/NCOA7/FBN2/ARF6/NPNT/TFRC/F7/CD9/RELL2/SLIT2/CHORDC1/RALGPS1/RASGEF1A/MAGI2/PDE3A/ZNF365/INSR/LOXL3/PTGS2/NPRL3/S100A13/NRARP/RASG…	79/374
GO:0009893	GO:BP	GO:0009893	positive regulation of metabolic process	0.00124006	79	SEMA7A/TBR1/MBP/MAP2K1/HTR2A/STARD4/PLP1/ESRRG/CDK2AP1/FOS/HSPA2/MEF2A/RGMB/CD44/IER5/ASPH/SLC2A13/ETS2/SDCBP/ADCYAP1/MORF4L1/GATM/ARL6IP5/DIPK2A/NFE2L2/IRS2/NTS/FGFR3/PTTG1IP/CITED4/EPHB2/CUX2/BACH1/POU3F2/HMBOX1/SOX4/LRRK2/HSPA5/APBB2/SLC38A2/NCOA7/PCGF5/TP53INP2/MAML3/NPNT/TFRC/SPON1/DCUN1D4/PXYLP1/KNDC1/CASP3/SMARCD1/CAMK4/HABP4/KLF13/ELOVL5/AIRE/ACSL3/ELAVL4/MAGI2/INSR/PTGS2/TACC1/L3MBTL3/S1…	79/374
GO:0043269	GO:BP	GO:0043269	regulation of monoatomic ion transport	0.00130097	21	SCN1B/CACNA2D1/KCNS2/TRPC3/HSPA2/KCNS1/FHL1/KCNH7/KCNJ3/LOC100386406/KCNK12/EPHB2/KCNA2/CACNG6/KCNJ4/KCNC2/KCNH8/KCNC1/SCN2B/SCN3A/PER1	21/374
GO:0120036	GO:BP	GO:0120036	plasma membrane bounded cell projection organization	0.00145041	39	BTBD3/SCN1B/SEMA7A/TBR1/NTNG1/PLP1/SEMA5B/FAT3/KALRN/CNTNAP1/CD44/NPTX1/PAK6/ADCYAP1/NEGR1/SHTN1/GFAP/CNP/EPHB2/RASGRF1/CUX2/POU3F2/LRRK2/ARF6/UGT8/KIF13B/KNDC1/SYT2/SLIT2/SLITRK3/S1PR1/ELAVL4/ZNF365/SLITRK1/PLXNB1/BLOC1S6/DSCAM/CTTN/SLC9A6	39/374
GO:0051239	GO:BP	GO:0051239	regulation of multicellular organismal process	0.00155442	63	SCN1B/SEMA7A/MBP/CACNA2D1/VAV3/ESRRG/FOS/TRPC3/KALRN/MEF2A/NPTX1/SDCBP/ADCYAP1/GATM/NFE2L2/CNOT2/GFAP/TNFRSF21/MTURN/IRS2/EPHB2/KCNA2/CUX2/POU3F2/GLS/SOX4/LRRK2/FBN2/EDNRB/ARF6/PKDCC/NPNT/TFRC/CD9/CASP3/ABI3BP/SLIT2/SLITRK3/S1PR1/KLF13/AIRE/PDE3A/SCN2B/ZNF365/INSR/LOXL3/SLITRK1/PTGS2/PLXNB1/S100A13/NRARP/RASGRP1/RORA/NRXN2/BLOC1S6/DSCAM/S100A1/ANXA2/NPTX2/CTTN/ENTPD4/PER1/STMP1	63/374
GO:0043412	GO:BP	GO:0043412	macromolecule modification	0.00176479	82	SEMA7A/CAMK2G/MAP2K1/HTR2A/CDK2AP1/HR/HSPA2/GALNT14/KALRN/MINK1/CD44/ASPH/PAK6/SMYD2/CDKL2/ADCYAP1/MORF4L1/RNF144A/RUSC1/DIPK2A/B3GALT1/NFE2L2/CIT/RCAN1/MKNK2/ST8SIA4/OS9/FGFR3/PIM3/PTTG1IP/GALNT2/EPHB2/PPT1/HECW2/SOX4/LRRK2/PTPRK/HSPA5/SPOCK2/NCEH1/TUSC3/NCOA7/PCGF5/PTP4A2/GALNT1/PKDCC/TFRC/RNF157/ASPHD2/DCUN1D4/KNDC1/RNF141/CASP3/SLIT2/ASB13/CHORDC1/HIPK3/CAMK4/SETD7/GALNT18/PPP6R1/MAGI2/INSR/L…	82/374
GO:0003008	GO:BP	GO:0003008	system process	0.0019259	47	SCN1B/TBR1/CACNA2D1/TRPC3/SEMA5B/KALRN/MEF2A/TRPV6/GLRA3/LOC100386406/CNTNAP1/NPTX1/PAK6/TPM1/ASIC1/GATM/ARL6IP5/USH1C/RCAN1/TNFRSF21/EPHB2/PPT1/CUX2/CHMP2B/GLS/EIF4EBP2/LRRK2/TUSC3/EDNRB/CALB1/NPNT/ADCY5/RASL10B/CASP3/SLIT2/CAMK4/KCNMB4/ELAVL4/PDE3A/SCN2B/PTGS2/NRXN2/S100A1/RETREG1/NPTX2/CTTN/GPR155	47/374
GO:0120035	GO:BP	GO:0120035	regulation of plasma membrane bounded cell projection organization	0.00206318	21	SCN1B/SEMA7A/TBR1/NTNG1/FAT3/KALRN/CD44/NEGR1/GFAP/EPHB2/CUX2/POU3F2/LRRK2/ARF6/KIF13B/KNDC1/SLIT2/ZNF365/SLITRK1/PLXNB1/DSCAM	21/374
GO:0030030	GO:BP	GO:0030030	cell projection organization	0.00212049	39	BTBD3/SCN1B/SEMA7A/TBR1/NTNG1/PLP1/SEMA5B/FAT3/KALRN/CNTNAP1/CD44/NPTX1/PAK6/ADCYAP1/NEGR1/SHTN1/GFAP/CNP/EPHB2/RASGRF1/CUX2/POU3F2/LRRK2/ARF6/UGT8/KIF13B/KNDC1/SYT2/SLIT2/SLITRK3/S1PR1/ELAVL4/ZNF365/SLITRK1/PLXNB1/BLOC1S6/DSCAM/CTTN/SLC9A6	39/374
GO:0140352	GO:BP	GO:0140352	export from cell	0.00231994	26	LIN7A/CPLX1/RIMS3/KALRN/TRPV6/UNC13C/SDCBP/CADPS2/ASIC1/IRS2/PPT1/KCNA2/SOX4/LRRK2/LGI3/EDNRB/ARF6/ADCY5/RASL10B/UNC13B/PTGS2/NAPB/RASGRP1/NRXN2/BLOC1S6/ATP9A	26/374
GO:0031344	GO:BP	GO:0031344	regulation of cell projection organization	0.00246872	21	SCN1B/SEMA7A/TBR1/NTNG1/FAT3/KALRN/CD44/NEGR1/GFAP/EPHB2/CUX2/POU3F2/LRRK2/ARF6/KIF13B/KNDC1/SLIT2/ZNF365/SLITRK1/PLXNB1/DSCAM	21/374
GO:0046903	GO:BP	GO:0046903	secretion	0.00291547	27	LIN7A/CPLX1/RIMS3/KALRN/TRPV6/UNC13C/SDCBP/CADPS2/ASIC1/IRS2/PPT1/KCNA2/SOX4/LRRK2/LGI3/EDNRB/ARF6/ADCY5/RASL10B/UNC13B/ACSL3/PTGS2/NAPB/RASGRP1/NRXN2/BLOC1S6/ATP9A	27/374
GO:0051171	GO:BP	GO:0051171	regulation of nitrogen compound metabolic process	0.00354634	104	SEMA7A/CUX1/TBR1/MBP/MAP2K1/CITED2/HTR2A/ESRRG/CDK2AP1/FOS/HSPA2/BACE2/MEF2A/RGMB/CD44/IER5/KCNIP3/ASPH/SLC2A13/NECAB3/ETS2/SDCBP/SMYD2/ADCYAP1/MORF4L1/ARL6IP5/DIPK2A/NFE2L2/BZW2/CNOT2/RCAN1/GFAP/MTURN/NTS/FGFR3/PTTG1IP/CITED4/ARID3B/KHDRBS2/EPHB2/CUX2/BACH1/POU3F2/HMBOX1/SOX4/EIF4EBP2/LRRK2/PTPRK/HSPA5/APBB2/SLC38A2/NCOA7/PCGF5/EDNRB/TP53INP2/MAML3/MTARC2/NPNT/TFRC/PAIP2B/CTSA/SPON1/DCUN1D4/PXYL…	104/374
GO:0048523	GO:BP	GO:0048523	negative regulation of cellular process	0.00361454	99	TBR1/MBP/MAP2K1/HTR2A/SEC14L1/BRINP3/LMO3/HSPA2/BACE2/DIXDC1/FHL1/FAT3/KALRN/MEF2A/HPGD/FHOD3/CD44/KCNIP3/ETS2/SDCBP/SMYD2/TPM1/ASIC1/ARL6IP5/DIPK2A/PHLPP1/NFE2L2/CNOT2/CIT/RCAN1/GFAP/TMEM215/TNFRSF21/OS9/IRS2/NTS/PTTG1IP/DDIT4L/EPHB2/PPT1/CUX2/BACH1/POU3F2/HMBOX1/SEMA6D/LZTS1/SOX4/EIF4EBP2/LRRK2/PTPRK/HSPA5/APBB2/NCOA7/FBN2/EDNRB/TP53INP2/TBRG1/ARF6/PKDCC/TFRC/PAIP2B/ZADH2/CTSA/CD9/ASTN2/CASP3/A…	99/374
GO:0001505	GO:BP	GO:0001505	regulation of neurotransmitter levels	0.00391516	10	LIN7A/RAB3B/CADPS2/ASIC1/GFAP/PPT1/SLC1A6/LRRK2/NAPB/NRXN2	10/374
GO:0006793	GO:BP	GO:0006793	phosphorus metabolic process	0.00541349	65	SEMA7A/CAMK2G/MAP2K1/HTR2A/CDK2AP1/HSPA2/EXTL2/KALRN/MINK1/CD44/PAK6/SDCBP/CDKL2/ADCYAP1/ELOVL4/DIPK2A/CIT/RCAN1/CNP/MKNK2/IRS2/FGFR3/PIM3/PLCH2/EPHB2/PLAAT3/LOC100401662/PDXK/LRRK2/PTPRK/NCEH1/DGKB/PTP4A2/SLC44A2/PKDCC/NPNT/TFRC/KNDC1/ADCY5/CASP3/SLIT2/PPP1R14B/CHORDC1/HIPK3/CAMK4/ELOVL5/ACSL3/PPP6R1/MAGI2/INSR/PTGS2/PLXNB1/CLPX/NRBP1/TLK1/RASGRP1/RORA/SBK1/DSCAM/PLPP1/NMNAT2/DAPK1/CDC42BPA/EEF1…	65/374
GO:0042391	GO:BP	GO:0042391	regulation of membrane potential	0.00553131	17	SCN1B/CACNA2D1/FHL1/RIMS3/GLRA3/LOC100386406/CNTNAP1/ASIC1/ARL6IP5/WDR1/CUX2/SLC1A6/LRRK2/GRIK4/HCN2/KCNMB4/SCN2B	17/374
GO:0045595	GO:BP	GO:0045595	regulation of cell differentiation	0.00555887	38	SEMA7A/HTR2A/TIAM1/BRINP3/FOS/LMO3/DIXDC1/KALRN/SDCBP/NFE2L2/GFAP/TNFRSF21/MTURN/EPHB2/CUX2/POU3F2/SOX4/LRRK2/FBN2/EDNRB/PKDCC/NPNT/ZADH2/ABI3BP/KLF13/PDE3A/ZNF365/LOXL3/SLITRK1/PTGS2/PLXNB1/NRARP/RASGRP1/RORA/BLOC1S6/DSCAM/ANXA2/ENTPD4	38/374
GO:0019222	GO:BP	GO:0019222	regulation of metabolic process	0.00639027	124	SEMA7A/CUX1/TBR1/MBP/MAP2K1/CITED2/HTR2A/STARD4/PLP1/ESRRG/CDK2AP1/FOS/HSPA2/BACE2/MEF2A/RGMB/HPGD/TSHZ1/CD44/IER5/KCNIP3/ASPH/SLC2A13/NECAB3/ETS2/SDCBP/SMYD2/ADCYAP1/MORF4L1/GATM/ARL6IP5/CLCN2/DIPK2A/NFE2L2/BZW2/CNOT2/RCAN1/GFAP/TNFRSF21/MTURN/IRS2/NTS/FGFR3/PTTG1IP/CITED4/ARID3B/KHDRBS2/EPHB2/CUX2/BACH1/POU3F2/HMBOX1/LZTS1/SOX4/EIF4EBP2/LRRK2/PTPRK/HSPA5/APBB2/SLC38A2/NCOA7/PCGF5/EDNRB/TP53INP2…	124/374
GO:0006796	GO:BP	GO:0006796	phosphate-containing compound metabolic process	0.00749517	64	SEMA7A/CAMK2G/MAP2K1/HTR2A/CDK2AP1/HSPA2/KALRN/MINK1/CD44/PAK6/SDCBP/CDKL2/ADCYAP1/ELOVL4/DIPK2A/CIT/RCAN1/CNP/MKNK2/IRS2/FGFR3/PIM3/PLCH2/EPHB2/PLAAT3/LOC100401662/PDXK/LRRK2/PTPRK/NCEH1/DGKB/PTP4A2/SLC44A2/PKDCC/NPNT/TFRC/KNDC1/ADCY5/CASP3/SLIT2/PPP1R14B/CHORDC1/HIPK3/CAMK4/ELOVL5/ACSL3/PPP6R1/MAGI2/INSR/PTGS2/PLXNB1/CLPX/NRBP1/TLK1/RASGRP1/RORA/SBK1/DSCAM/PLPP1/NMNAT2/DAPK1/CDC42BPA/EEF1A2/PAK1	64/374
GO:0010604	GO:BP	GO:0010604	positive regulation of macromolecule metabolic process	0.00770134	72	SEMA7A/TBR1/MBP/MAP2K1/HTR2A/PLP1/ESRRG/CDK2AP1/FOS/HSPA2/MEF2A/RGMB/CD44/IER5/ASPH/SLC2A13/ETS2/ADCYAP1/MORF4L1/ARL6IP5/DIPK2A/NFE2L2/IRS2/NTS/FGFR3/PTTG1IP/CITED4/EPHB2/CUX2/BACH1/POU3F2/HMBOX1/SOX4/LRRK2/HSPA5/APBB2/SLC38A2/NCOA7/PCGF5/TP53INP2/MAML3/NPNT/TFRC/SPON1/DCUN1D4/PXYLP1/KNDC1/CASP3/SMARCD1/CAMK4/HABP4/KLF13/AIRE/ELAVL4/MAGI2/INSR/PTGS2/TACC1/L3MBTL3/S100A13/RASGRP1/RORA/RNF10/ANXA2/…	72/374
GO:0016358	GO:BP	GO:0016358	dendrite development	0.00825784	12	BTBD3/FAT3/KALRN/EPHB2/CUX2/LRRK2/ARF6/KNDC1/ELAVL4/ZNF365/DSCAM/SLC9A6	12/374
GO:0061564	GO:BP	GO:0061564	axon development	0.0101491	17	SCN1B/SEMA7A/TBR1/NTNG1/PLP1/SEMA5B/CNTNAP1/NPTX1/CNP/EPHB2/POU3F2/KIF13B/SLIT2/SLITRK3/SLITRK1/PLXNB1/DSCAM	17/374
GO:0031325	GO:BP	GO:0031325	positive regulation of cellular metabolic process	0.0106861	70	SEMA7A/TBR1/MBP/MAP2K1/HTR2A/STARD4/PLP1/ESRRG/CDK2AP1/FOS/HSPA2/MEF2A/RGMB/CD44/IER5/ETS2/SDCBP/ADCYAP1/MORF4L1/DIPK2A/NFE2L2/IRS2/NTS/FGFR3/CITED4/EPHB2/CUX2/BACH1/POU3F2/HMBOX1/SOX4/LRRK2/APBB2/SLC38A2/NCOA7/PCGF5/TP53INP2/MAML3/NPNT/TFRC/SPON1/PXYLP1/KNDC1/SMARCD1/CAMK4/HABP4/KLF13/ELOVL5/AIRE/ACSL3/ELAVL4/MAGI2/INSR/PTGS2/TACC1/S100A13/RASGRP1/RORA/RNF10/DSCAM/ANXA2/NFIX/DAPK1/EEF1A2/PER1/ST…	70/374
GO:0048813	GO:BP	GO:0048813	dendrite morphogenesis	0.0108046	9	BTBD3/KALRN/EPHB2/CUX2/LRRK2/KNDC1/ELAVL4/ZNF365/DSCAM	9/374
GO:0051336	GO:BP	GO:0051336	regulation of hydrolase activity	0.0126917	25	MBP/HTR2A/TIAM1/VAV3/TIAM2/KALRN/CD44/ASPH/ADCYAP1/ARL6IP5/RCAN1/FGFR3/PPT1/RASGRF1/LRRK2/NPNT/PREX1/PPP6R1/MAGI2/PDE3A/PTGS2/PLXNB1/RASGRP1/EFNA5/DAPK1	25/374
GO:0007417	GO:BP	GO:0007417	central nervous system development	0.0127297	27	BTBD3/SCN1B/SEMA7A/TBR1/PLP1/BRINP3/DIXDC1/CNTNAP1/GFAP/CNP/TNFRSF21/IRS2/EPHB2/PPT1/POU3F2/SEMA6D/SOX4/LRRK2/HSPA5/KNDC1/SLIT2/ALDH5A1/S1PR1/ELAVL4/ZNF365/LOXL3/RORA	27/374
GO:0051128	GO:BP	GO:0051128	regulation of cellular component organization	0.0131388	52	SCN1B/SEMA7A/TBR1/NTNG1/HSPA2/DIXDC1/FHL1/FAT3/KALRN/FHOD3/CNTNAP1/CD44/SDCBP/NEGR1/CNOT2/GFAP/WDR1/EPHB2/PPT1/CUX2/HECW2/CHMP2B/POU3F2/HMBOX1/LRRK2/DGKB/ARF6/BICD1/TFRC/KIF13B/KNDC1/SYT2/SLIT2/CHORDC1/SLITRK3/TBC1D14/MAGI2/PDE3A/ZNF365/INSR/SLITRK1/NAPB/PLXNB1/L3MBTL3/TLK1/EFNA5/DSCAM/ANXA2/CTTN/STMP1/PAK1/TNKS2	52/374
GO:0007409	GO:BP	GO:0007409	axonogenesis	0.014171	16	SCN1B/SEMA7A/TBR1/NTNG1/SEMA5B/CNTNAP1/NPTX1/CNP/EPHB2/POU3F2/KIF13B/SLIT2/SLITRK3/SLITRK1/PLXNB1/DSCAM	16/374
GO:0045597	GO:BP	GO:0045597	positive regulation of cell differentiation	0.0144369	25	SEMA7A/HTR2A/BRINP3/FOS/LMO3/KALRN/SDCBP/GFAP/MTURN/EPHB2/CUX2/SOX4/FBN2/PKDCC/NPNT/ABI3BP/PDE3A/ZNF365/SLITRK1/PTGS2/PLXNB1/RASGRP1/BLOC1S6/DSCAM/ENTPD4	25/374
GO:0048513	GO:BP	GO:0048513	animal organ development	0.0150254	60	BTBD3/SEMA7A/TBR1/TIAM1/FOS/LIN7A/DIXDC1/FHL1/FAT3/KALRN/MEF2A/FJX1/FHOD3/CNTNAP1/TSHZ1/CD44/SDCBP/TPM1/CLCN2/DIPK2A/RCAN1/TMEM215/IRS2/EPHB2/PPT1/PLAAT3/SAFB2/POU3F2/SEMA6D/SOX4/LRRK2/HSPA5/FBN2/EDNRB/CALB1/ARF6/PKDCC/NPNT/KNDC1/CHD2/RHOBTB3/CASP3/ABI3BP/SLIT2/NEBL/S1PR1/AIRE/ELAVL4/HS6ST1/ZNF365/INSR/LOXL3/PTGS2/NPRL3/PLXNB1/RORA/DSCAM/GPCPD1/ANXA2/ENTPD4	60/374
GO:0051246	GO:BP	GO:0051246	regulation of protein metabolic process	0.015363	51	SEMA7A/MBP/MAP2K1/HTR2A/CDK2AP1/HSPA2/BACE2/CD44/ASPH/SLC2A13/NECAB3/SDCBP/ADCYAP1/ARL6IP5/DIPK2A/BZW2/RCAN1/GFAP/FGFR3/PTTG1IP/EPHB2/SOX4/EIF4EBP2/LRRK2/HSPA5/NCOA7/EDNRB/TFRC/PAIP2B/CTSA/SPON1/DCUN1D4/PXYLP1/KNDC1/CASP3/SLIT2/CHORDC1/HABP4/AIRE/PPP6R1/MAGI2/INSR/PTGS2/L3MBTL3/RASGRP1/NMNAT2/ANXA2/DAPK1/IVNS1ABP/PER1/PAK1	51/374
GO:0051173	GO:BP	GO:0051173	positive regulation of nitrogen compound metabolic process	0.0156454	64	SEMA7A/TBR1/MBP/MAP2K1/HTR2A/ESRRG/CDK2AP1/FOS/HSPA2/MEF2A/RGMB/CD44/IER5/ASPH/SLC2A13/ETS2/ADCYAP1/MORF4L1/ARL6IP5/DIPK2A/NFE2L2/FGFR3/PTTG1IP/CITED4/BACH1/POU3F2/HMBOX1/SOX4/LRRK2/HSPA5/APBB2/SLC38A2/NCOA7/PCGF5/TP53INP2/MAML3/NPNT/TFRC/SPON1/DCUN1D4/PXYLP1/KNDC1/CASP3/CAMK4/HABP4/KLF13/AIRE/ACSL3/MAGI2/INSR/PTGS2/TACC1/L3MBTL3/RASGRP1/RORA/RNF10/ANXA2/NFIX/DAPK1/PER1/RGMA/DCAF6/PAK1/TNKS2	64/374
GO:0031323	GO:BP	GO:0031323	regulation of cellular metabolic process	0.016143	115	SEMA7A/CUX1/TBR1/MBP/MAP2K1/CITED2/HTR2A/STARD4/PLP1/ESRRG/CDK2AP1/FOS/HSPA2/BACE2/MEF2A/RGMB/TSHZ1/CD44/IER5/KCNIP3/NECAB3/ETS2/SDCBP/SMYD2/ADCYAP1/MORF4L1/CLCN2/DIPK2A/NFE2L2/BZW2/CNOT2/RCAN1/GFAP/TNFRSF21/MTURN/IRS2/NTS/FGFR3/CITED4/ARID3B/KHDRBS2/EPHB2/CUX2/BACH1/POU3F2/HMBOX1/LZTS1/SOX4/EIF4EBP2/LRRK2/PTPRK/APBB2/SLC38A2/NCOA7/PCGF5/EDNRB/TP53INP2/MAML3/MTARC2/NPNT/TFRC/PAIP2B/CTSA/SPON1/PXY…	115/374
GO:0007626	GO:BP	GO:0007626	locomotory behavior	0.0197412	12	KALRN/LOC100386406/PAK6/NEGR1/RCAN1/CNP/PPT1/LRRK2/CALB1/ADCY5/ELAVL4/DSCAM	12/374
GO:0051240	GO:BP	GO:0051240	positive regulation of multicellular organismal process	0.0203154	38	SEMA7A/MBP/VAV3/ESRRG/FOS/TRPC3/KALRN/MEF2A/SDCBP/ADCYAP1/GATM/NFE2L2/GFAP/IRS2/EPHB2/CUX2/POU3F2/SOX4/FBN2/PKDCC/NPNT/TFRC/ABI3BP/SLITRK3/AIRE/ZNF365/SLITRK1/PTGS2/PLXNB1/S100A13/RASGRP1/RORA/BLOC1S6/DSCAM/ANXA2/CTTN/ENTPD4/STMP1	38/374
GO:0016192	GO:BP	GO:0016192	vesicle-mediated transport	0.0268807	37	CUX1/LIN7A/CPLX1/RIMS3/UNC13C/SDCBP/RAB3B/CADPS2/PPT1/CHMP2B/CDC42SE2/LRRK2/LGI3/ARF6/MYO5A/PKDCC/BICD1/TFRC/CD9/ERGIC2/RHOBTB3/UNC13B/TBC1D14/BCAP29/ACSL3/MAGI2/INSR/LOXL3/GOLGA7/NAPB/NRBP1/RASGRP1/ANXA2/ENTPD4/ATP9A/SLC17A6/CORO7	37/374
GO:0006814	GO:BP	GO:0006814	sodium ion transport	0.0276562	12	SCN1B/SLC24A2/LOC100386406/ASIC1/SLC20A2/EDNRB/NALCN/HCN2/SCN2B/SCN3A/PER1/SLC9A6	12/374
GO:0010927	GO:BP	GO:0010927	cellular component assembly involved in morphogenesis	0.0297698	8	MEF2A/FHOD3/CNTNAP1/TPM1/WDR1/CD9/UGT8/NEBL	8/374
GO:0044281	GO:BP	GO:0044281	small molecule metabolic process	0.0310522	44	HTR2A/STARD4/PLP1/EXTL2/HPGD/GLDC/TECR/MAT2B/GCSH/GATM/CLCN2/ELOVL4/CNP/IRS2/PLAAT3/LOC100401662/GLS/PDXK/LRRK2/NCEH1/ADI1/EDNRB/PMM1/ZADH2/ADCY5/ALDH5A1/ACSL6/ELOVL5/FADS1/ACSL3/OAT/INSR/PTGS2/CLPX/DHRS7/RORA/CARS1/ECHS1/CS/PLPP1/NMNAT2/AADAT/PDXDC1/SERGEF	44/374
GO:0034330	GO:BP	GO:0034330	cell junction organization	0.0315269	22	NTNG1/KALRN/CNTNAP1/CLDN11/WDR1/EPHB2/CUX2/CDH6/LRRK2/PTPRK/DGKB/ARF6/CD9/UGT8/SLITRK3/ZNF365/SLITRK1/PLXNB1/NRXN2/EFNA5/CTTN/SLC9A6	22/374
GO:0007613	GO:BP	GO:0007613	memory	0.0333727	8	KALRN/PAK6/ASIC1/RCAN1/CUX2/EIF4EBP2/CALB1/CAMK4	8/374
GO:0023061	GO:BP	GO:0023061	signal release	0.0338393	16	LIN7A/KALRN/TRPV6/CADPS2/ASIC1/IRS2/PPT1/KCNA2/SOX4/LRRK2/EDNRB/ADCY5/RASL10B/PTGS2/NAPB/NRXN2	16/374
GO:0099173	GO:BP	GO:0099173	postsynapse organization	0.0341245	10	KALRN/CNTNAP1/EPHB2/CUX2/LRRK2/DGKB/SLITRK3/ZNF365/NRXN2/CTTN	10/374
GO:0048519	GO:BP	GO:0048519	negative regulation of biological process	0.0345019	100	TBR1/MBP/MAP2K1/HTR2A/SEC14L1/BRINP3/LMO3/HSPA2/BACE2/DIXDC1/FHL1/FAT3/KALRN/MEF2A/HPGD/FHOD3/CD44/KCNIP3/ETS2/SDCBP/SMYD2/TPM1/ASIC1/ARL6IP5/DIPK2A/PHLPP1/NFE2L2/CNOT2/CIT/RCAN1/GFAP/TMEM215/TNFRSF21/OS9/IRS2/NTS/PTTG1IP/DDIT4L/EPHB2/PPT1/CUX2/BACH1/POU3F2/HMBOX1/SEMA6D/LZTS1/SOX4/EIF4EBP2/LRRK2/PTPRK/HSPA5/APBB2/NCOA7/FBN2/EDNRB/TP53INP2/TBRG1/ARF6/PKDCC/TFRC/PAIP2B/ZADH2/CTSA/SPON1/CD9/ASTN2/C…	100/374
GO:0050877	GO:BP	GO:0050877	nervous system process	0.0350018	33	SCN1B/TBR1/SEMA5B/KALRN/GLRA3/LOC100386406/CNTNAP1/NPTX1/PAK6/ASIC1/GATM/ARL6IP5/USH1C/RCAN1/TNFRSF21/EPHB2/PPT1/CUX2/CHMP2B/GLS/EIF4EBP2/LRRK2/TUSC3/CALB1/ADCY5/CASP3/CAMK4/KCNMB4/ELAVL4/NRXN2/RETREG1/NPTX2/GPR155	33/374
GO:0030913	GO:BP	GO:0030913	paranodal junction assembly	0.0385705	3	CNTNAP1/CD9/UGT8	3/374
GO:0080135	GO:BP	GO:0080135	regulation of cellular response to stress	0.0396937	21	MINK1/IGFBP6/CD44/IER5/SMYD2/MORF4L1/ARL6IP5/PHLPP1/NFE2L2/MTURN/PTTG1IP/SOX4/LRRK2/SLC38A2/NCOA7/RELL2/CHORDC1/ZNF365/PTGS2/RASGRP1/RELL1	21/374
GO:0065009	GO:BP	GO:0065009	regulation of molecular function	0.0402044	50	SCN1B/MBP/MAP2K1/HTR2A/TIAM1/VAV3/KCNS2/HSPA2/TIAM2/KCNS1/FHL1/KALRN/CD44/NPTX1/ASPH/ADCYAP1/ARL6IP5/DIPK2A/RCAN1/MTURN/IRS2/NTS/FGFR3/EPHB2/PPT1/RASGRF1/HMBOX1/LRRK2/NPNT/TFRC/SPON1/CASP3/CHORDC1/HABP4/PREX1/PPP6R1/MAGI2/PDE3A/SCN2B/INSR/PTGS2/PLXNB1/RASGRP1/NRXN2/EFNA5/ANXA2/DAPK1/NPTX2/EEF1A2/PAK1	50/374
GO:0016020	GO:CC	GO:0016020	membrane	8.81407187848084e-25	227	SCN1B/SEMA7A/TAFA2/CUX1/ASGR2/CABP1/NTNG1/CACNA2D1/MAP2K1/HTR2A/TIAM1/VAV3/PLP1/KCNS2/TUBA8/PARM1/TRPC3/LIN7A/HSPA2/BACE2/TIAM2/KCNS1/SLC24A2/GALNT14/ADAM23/EXTL2/FHL1/SEMA5B/FAT3/RIMS3/KALRN/TRPV6/KCNH7/RGMB/HPGD/TENM2/CLEC2L/TRPM3/UNC13C/KCNJ3/GLRA3/LOC100386406/CNTNAP1/SYT7/CD44/GLDC/ASPH/NAT8L/KCNK12/SLC2A13/NECAB3/ETS2/SDCBP/NIPAL2/RAB3B/TECR/TPM1/ATRNL1/CLDN11/ASIC1/SLC2A8/NEGR1/GATM/LSAMP/…	227/386
GO:0071944	GO:CC	GO:0071944	cell periphery	1.75641126177902e-16	130	SCN1B/SEMA7A/CABP1/NTNG1/CACNA2D1/MMP17/MAP2K1/HTR2A/TIAM1/VAV3/PLP1/KCNS2/PARM1/TRPC3/LIN7A/HSPA2/BACE2/KCNS1/SLC24A2/ADAM23/FHL1/FAT3/TRPV6/RGMB/HPGD/TENM2/KCNJ3/GLRA3/LOC100386406/CD44/GLDC/ASPH/SLC2A13/ETS2/SDCBP/RAB3B/TPM1/CLDN11/ASIC1/SLC2A8/NEGR1/ARL6IP5/CLCN2/NFE2L2/CNOT2/GPR158/CNP/GPR6/PDYN/TNFRSF21/IRS2/FGFR3/CAPN2/PRRC2A/PLCH2/WDR1/SLC20A2/EPHB2/KCNA2/HMCN1/SLC1A6/CDH6/CHMP2B/CDH18/CA…	130/386
GO:0005886	GO:CC	GO:0005886	plasma membrane	4.70637550866667e-16	123	SCN1B/SEMA7A/CABP1/NTNG1/CACNA2D1/MAP2K1/HTR2A/TIAM1/VAV3/PLP1/KCNS2/PARM1/TRPC3/LIN7A/HSPA2/BACE2/KCNS1/SLC24A2/ADAM23/FHL1/FAT3/TRPV6/RGMB/HPGD/TENM2/KCNJ3/GLRA3/LOC100386406/CD44/GLDC/ASPH/SLC2A13/ETS2/SDCBP/RAB3B/TPM1/CLDN11/ASIC1/SLC2A8/NEGR1/ARL6IP5/CLCN2/NFE2L2/CNOT2/GPR158/CNP/GPR6/PDYN/TNFRSF21/IRS2/FGFR3/CAPN2/PRRC2A/PLCH2/WDR1/SLC20A2/EPHB2/KCNA2/SLC1A6/CDH6/CHMP2B/CDH18/CACNG6/SEMA6D/…	123/386
GO:0012505	GO:CC	GO:0012505	endomembrane system	1.09749069940939e-11	100	CUX1/CABP1/CACNA2D1/MAP2K1/SEC14L1/TUBA8/PARM1/FOS/BACE2/PCSK1/GALNT14/EXTL2/HS3ST1/MINK1/CD44/ASPH/NECAB3/SDCBP/RAB3B/TECR/ASIC1/RNF144A/RUSC1/ELOVL4/DIPK2A/B3GALT1/NFE2L2/PAM/PDYN/ST8SIA4/OS9/NTS/FGFR3/CAPN2/GALNT2/RCN2/PPT1/SLC1A6/PLAAT3/CHMP2B/SEMA6D/LRRK2/HSPA5/LGI3/APBB2/TUSC3/PCGF5/PTP4A2/GALNT1/CALN1/ARF6/MYO5A/PKDCC/BICD1/TFRC/F7/SCRG1/ERGIC2/PXYLP1/SYT2/QSOX2/ASTN2/SPCS3/ACSL6/HABP4/TBC…	100/386
GO:0098793	GO:CC	GO:0098793	presynapse	1.10527603887306e-10	25	NTNG1/HTR2A/LIN7A/ADAM23/UNC13C/KCNJ3/RAB3B/CADPS2/ASIC1/ARL6IP5/EPHB2/PPT1/KCNA2/SLC1A6/LRRK2/LGI3/CALB1/GRIK4/PPFIA4/SYT2/UNC13B/SLC35G2/NRXN2/SLC17A6/SLC9A6	25/386
GO:0030054	GO:CC	GO:0030054	cell junction	4.34043896269722e-10	58	SCN1B/CABP1/NTNG1/HTR2A/TIAM1/PVALB/LIN7A/ADAM23/CPLX1/UNC13C/KCNJ3/GLRA3/LOC100386406/CNTNAP1/NPTX1/CCDC85A/PAK6/RAB3B/CLDN11/CADPS2/ASIC1/ARL6IP5/PDYN/WDR1/EPHB2/PPT1/KCNA2/HMCN1/SLC1A6/CDH6/GLS/LRRK2/PTPRK/LGI3/DGKB/CALB1/GRIK4/ARHGAP26/PPFIA4/SYT2/UNC13B/SLITRK3/MAGI2/SLC35G2/TMEM47/SLITRK1/ALKBH6/NAPB/NRXN2/PDLIM7/NMNAT2/NPTX2/SLC17A6/EEF1A2/LRRTM1/DCAF6/PAK1/SLC9A6	58/386
GO:0034703	GO:CC	GO:0034703	cation channel complex	1.76363325336348e-09	19	SCN1B/CACNA2D1/KCNS2/HSPA2/KCNS1/TRPV6/KCNJ3/LOC100386406/KCNA2/CACNG6/GRIK4/KCNQ5/HCN2/KCNC2/KCNC1/KCNMB4/SCN2B/SCN3A/CTTN	19/386
GO:0045202	GO:CC	GO:0045202	synapse	5.27861600662903e-09	43	CABP1/NTNG1/HTR2A/PVALB/LIN7A/ADAM23/CPLX1/UNC13C/KCNJ3/GLRA3/CNTNAP1/NPTX1/PAK6/RAB3B/CADPS2/ASIC1/ARL6IP5/PDYN/EPHB2/PPT1/KCNA2/SLC1A6/CDH6/GLS/LRRK2/LGI3/DGKB/CALB1/GRIK4/PPFIA4/SYT2/UNC13B/SLITRK3/SLC35G2/SLITRK1/NAPB/NRXN2/NMNAT2/NPTX2/SLC17A6/EEF1A2/LRRTM1/SLC9A6	43/386
GO:0005794	GO:CC	GO:0005794	Golgi apparatus	1.11169645284045e-08	49	CUX1/CABP1/SEC14L1/PARM1/BACE2/GALNT14/HS3ST1/MINK1/CD44/NECAB3/ASIC1/RNF144A/RUSC1/DIPK2A/B3GALT1/NFE2L2/ST8SIA4/FGFR3/CAPN2/GALNT2/PPT1/SLC1A6/SEMA6D/LRRK2/APBB2/PCGF5/GALNT1/CALN1/PKDCC/BICD1/F7/SCRG1/ERGIC2/PXYLP1/QSOX2/TBC1D14/GALNT18/ACSL3/HS6ST1/SLC35G2/EMID1/GOLGA7/RASGRP1/MGAT1/NMNAT2/CTTN/PDXDC1/ATP9A/CORO7	49/386
GO:0030424	GO:CC	GO:0030424	axon	1.71499022189436e-08	23	SCN1B/HTR2A/PVALB/LOC100386406/CNTNAP1/CLDN11/SHTN1/NEFM/TNFRSF21/EPHB2/PPT1/RASGRF1/KCNA2/LRRK2/LGI3/CALB1/KIF13B/KCNC1/ELAVL4/BLOC1S6/DSCAM/LRRTM1/SLC9A6	23/386
GO:0034702	GO:CC	GO:0034702	monoatomic ion channel complex	4.83604326840443e-07	20	SCN1B/CACNA2D1/KCNS2/HSPA2/KCNS1/TRPV6/KCNJ3/GLRA3/LOC100386406/KCNA2/CACNG6/GRIK4/KCNQ5/HCN2/KCNC2/KCNC1/KCNMB4/SCN2B/SCN3A/CTTN	20/386
GO:0034705	GO:CC	GO:0034705	potassium channel complex	8.09991285528839e-06	11	KCNS2/KCNS1/KCNJ3/KCNA2/GRIK4/KCNQ5/HCN2/KCNC2/KCNC1/KCNMB4/CTTN	11/386
GO:0098797	GO:CC	GO:0098797	plasma membrane protein complex	1.80352162645153e-05	25	SCN1B/CACNA2D1/KCNS2/LIN7A/HSPA2/KCNS1/KCNJ3/GLRA3/LOC100386406/SDCBP/KCNA2/CACNG6/GRIK4/TFRC/KCNQ5/HCN2/KCNC2/KCNC1/KCNMB4/SCN2B/INSR/NOXA1/SCN3A/ANXA2/CTTN	25/386
GO:1990351	GO:CC	GO:1990351	transporter complex	2.61447178197383e-05	21	SCN1B/CACNA2D1/KCNS2/HSPA2/KCNS1/TRPV6/KCNJ3/GLRA3/LOC100386406/KCNA2/CACNG6/GRIK4/KCNQ5/ERGIC2/HCN2/KCNC2/KCNC1/KCNMB4/SCN2B/SCN3A/CTTN	21/386
GO:0008076	GO:CC	GO:0008076	voltage-gated potassium channel complex	2.74204677124299e-05	10	KCNS2/KCNS1/KCNJ3/KCNA2/KCNQ5/HCN2/KCNC2/KCNC1/KCNMB4/CTTN	10/386
GO:0043005	GO:CC	GO:0043005	neuron projection	2.92178715707435e-05	29	SCN1B/HTR2A/PVALB/FAT3/LOC100386406/CNTNAP1/CLDN11/SHTN1/NEFM/TNFRSF21/LCA5/EPHB2/PPT1/RASGRF1/KCNA2/LRRK2/LGI3/CALB1/SCRG1/KIF13B/KNDC1/KCNC1/ELOVL5/ELAVL4/PTGS2/BLOC1S6/DSCAM/LRRTM1/SLC9A6	29/386
GO:1902495	GO:CC	GO:1902495	transmembrane transporter complex	4.70474501222683e-05	20	SCN1B/CACNA2D1/KCNS2/HSPA2/KCNS1/TRPV6/KCNJ3/GLRA3/LOC100386406/KCNA2/CACNG6/GRIK4/KCNQ5/HCN2/KCNC2/KCNC1/KCNMB4/SCN2B/SCN3A/CTTN	20/386
GO:0042995	GO:CC	GO:0042995	cell projection	0.000676831	44	SCN1B/HTR2A/PVALB/FAT3/TENM2/GLRA3/LOC100386406/CNTNAP1/CD44/SLC2A13/TPM1/CLDN11/SHTN1/NEFM/USH1C/GFAP/TNFRSF21/LCA5/CAPN2/EPHB2/PPT1/RASGRF1/KCNA2/LRRK2/LGI3/CALB1/ARF6/MYO5A/SCRG1/KIF13B/KNDC1/ADCY5/KCNC1/ELOVL5/ELAVL4/PTGS2/BLOC1S6/PDLIM7/DSCAM/CDC42BPA/CTTN/LRRTM1/PAK1/SLC9A6	44/386
GO:0044297	GO:CC	GO:0044297	cell body	0.00100655	14	LOC100386406/SLC2A13/SHTN1/GFAP/EPHB2/PPT1/KCNA2/LRRK2/CALB1/KNDC1/KCNC1/ELOVL5/ELAVL4/DSCAM	14/386
GO:0031410	GO:CC	GO:0031410	cytoplasmic vesicle	0.00174992	40	CACNA2D1/HTR2A/STARD4/TUBA8/PARM1/BACE2/PCSK1/RAB3B/CADPS2/RUSC1/DIPK2A/PAM/CNP/PDYN/NTS/FGFR3/PPT1/CHMP2B/LRRK2/HSPA5/LGI3/APBB2/PTP4A2/ARF6/MYO5A/BICD1/TFRC/ERGIC2/SYT2/ASTN2/TBC1D14/SLC35G2/ACKR1/BLOC1S6/APPBP2/NMNAT2/ANXA2/ATP9A/SLC17A6/SLC9A6	40/386
GO:0097708	GO:CC	GO:0097708	intracellular vesicle	0.0019428	40	CACNA2D1/HTR2A/STARD4/TUBA8/PARM1/BACE2/PCSK1/RAB3B/CADPS2/RUSC1/DIPK2A/PAM/CNP/PDYN/NTS/FGFR3/PPT1/CHMP2B/LRRK2/HSPA5/LGI3/APBB2/PTP4A2/ARF6/MYO5A/BICD1/TFRC/ERGIC2/SYT2/ASTN2/TBC1D14/SLC35G2/ACKR1/BLOC1S6/APPBP2/NMNAT2/ANXA2/ATP9A/SLC17A6/SLC9A6	40/386
GO:0031982	GO:CC	GO:0031982	vesicle	0.00197275	42	CACNA2D1/HTR2A/STARD4/TUBA8/PARM1/BACE2/PCSK1/SDCBP/RAB3B/CADPS2/RUSC1/DIPK2A/PAM/CNP/PDYN/NTS/FGFR3/PPT1/CHMP2B/LRRK2/HSPA5/LGI3/APBB2/PTP4A2/ARF6/MYO5A/BICD1/TFRC/CD9/ERGIC2/SYT2/ASTN2/TBC1D14/SLC35G2/ACKR1/BLOC1S6/APPBP2/NMNAT2/ANXA2/ATP9A/SLC17A6/SLC9A6	42/386
GO:0098978	GO:CC	GO:0098978	glutamatergic synapse	0.00201878	16	NTNG1/ADAM23/CNTNAP1/NPTX1/EPHB2/SLC1A6/CDH6/LRRK2/DGKB/CALB1/PPFIA4/SLITRK1/NAPB/NRXN2/NPTX2/SLC9A6	16/386
GO:0005737	GO:CC	GO:0005737	cytoplasm	0.00202755	221	BTBD3/CUX1/CABP1/CACNA2D1/MAP2K1/HTR2A/STARD4/TIAM1/SEC14L1/VAV3/PVALB/KCNS2/CDK2AP1/TUBA8/PARM1/FOS/LMO3/HSPA2/BACE2/TIAM2/KCNS1/PCSK1/GALNT14/DIXDC1/EXTL2/FHL1/HS3ST1/KALRN/MEF2A/MINK1/RGMB/HPGD/UNC13C/LOC100386406/CD44/GLDC/IER5/ASPH/NAT8L/NECAB3/ETS2/SDCBP/RAB3B/TECR/SMYD2/S100B/TPM1/CLDN11/GCSH/CADPS2/ASIC1/GATM/LSAMP/RNF144A/ARL6IP5/RUSC1/ELOVL4/DIPK2A/SHTN1/B3GALT1/THOC7/NFE2L2/BZW2/PAM/CN…	221/386
GO:0044304	GO:CC	GO:0044304	main axon	0.00273327	6	SCN1B/LOC100386406/CNTNAP1/KCNA2/LGI3/KCNC1	6/386
GO:0043025	GO:CC	GO:0043025	neuronal cell body	0.00287649	12	LOC100386406/SHTN1/EPHB2/PPT1/KCNA2/LRRK2/CALB1/KNDC1/KCNC1/ELOVL5/ELAVL4/DSCAM	12/386
GO:0120025	GO:CC	GO:0120025	plasma membrane bounded cell projection	0.00296381	41	SCN1B/HTR2A/PVALB/FAT3/LOC100386406/CNTNAP1/CD44/TPM1/CLDN11/SHTN1/NEFM/USH1C/GFAP/TNFRSF21/LCA5/CAPN2/EPHB2/PPT1/RASGRF1/KCNA2/LRRK2/LGI3/CALB1/ARF6/MYO5A/SCRG1/KIF13B/KNDC1/ADCY5/KCNC1/ELOVL5/ELAVL4/PTGS2/BLOC1S6/PDLIM7/DSCAM/CDC42BPA/CTTN/LRRTM1/PAK1/SLC9A6	41/386
GO:0042734	GO:CC	GO:0042734	presynaptic membrane	0.00473505	7	NTNG1/ADAM23/KCNJ3/EPHB2/KCNA2/SLC1A6/GRIK4	7/386
GO:0034706	GO:CC	GO:0034706	sodium channel complex	0.00515807	5	SCN1B/LOC100386406/GRIK4/SCN2B/SCN3A	5/386
GO:0030133	GO:CC	GO:0030133	transport vesicle	0.00577381	12	PCSK1/RAB3B/PAM/NTS/FGFR3/PPT1/LRRK2/LGI3/SYT2/SLC35G2/BLOC1S6/SLC17A6	12/386
GO:0098796	GO:CC	GO:0098796	membrane protein complex	0.00683195	34	SCN1B/CACNA2D1/KCNS2/LIN7A/HSPA2/KCNS1/TRPV6/KCNJ3/GLRA3/LOC100386406/SDCBP/DIPK2A/KCNA2/CHMP2B/LOC100401662/CACNG6/TUSC3/GRIK4/TFRC/KCNQ5/HCN2/KCNC2/SPCS3/KCNC1/KCNMB4/SCN2B/INSR/NOXA1/NAPB/SCN3A/BLOC1S6/ANXA2/CTTN/CORO7	34/386
GO:0030315	GO:CC	GO:0030315	T-tubule	0.00829414	5	SCN1B/CACNA2D1/LOC100386406/CACNG6/SCN2B	5/386
GO:0030425	GO:CC	GO:0030425	dendrite	0.0214602	13	HTR2A/FAT3/EPHB2/PPT1/KCNA2/LRRK2/CALB1/KNDC1/KCNC1/ELOVL5/ELAVL4/DSCAM/SLC9A6	13/386
GO:0001518	GO:CC	GO:0001518	voltage-gated sodium channel complex	0.022208	4	SCN1B/LOC100386406/SCN2B/SCN3A	4/386
GO:0097447	GO:CC	GO:0097447	dendritic tree	0.0224772	13	HTR2A/FAT3/EPHB2/PPT1/KCNA2/LRRK2/CALB1/KNDC1/KCNC1/ELOVL5/ELAVL4/DSCAM/SLC9A6	13/386
GO:0150034	GO:CC	GO:0150034	distal axon	0.0369231	8	SHTN1/RASGRF1/KCNA2/LRRK2/ELAVL4/DSCAM/LRRTM1/SLC9A6	8/386
GO:0008021	GO:CC	GO:0008021	synaptic vesicle	0.0388012	7	RAB3B/PPT1/LRRK2/LGI3/SYT2/SLC35G2/SLC17A6	7/386
GO:0005783	GO:CC	GO:0005783	endoplasmic reticulum	0.0435985	36	CABP1/CACNA2D1/MAP2K1/FOS/EXTL2/ASPH/NECAB3/TECR/ELOVL4/OS9/FGFR3/CAPN2/RCN2/PLAAT3/LRRK2/HSPA5/APBB2/TUSC3/MYO5A/F7/ERGIC2/SPCS3/ACSL6/BCAP29/ELOVL5/FADS1/ACSL3/PTGS2/EMID1/DHRS7/CTSF/S100A1/RETREG1/ENTPD4/LRRTM1/RGMA	36/386
GO:0005509	GO:MF	GO:0005509	calcium ion binding	3.35610800943316e-09	41	EDIL3/CABP1/MATN4/PVALB/CRTAC1/FAT3/TENM2/UNC13C/KCNIP3/NECAB3/HPCAL1/S100B/CAPN2/PLCH2/RCN2/HMCN1/CDH6/CDH18/SPOCK2/PCDH7/FBN2/DGKB/CALB1/CALN1/NPNT/SRI/CRELD1/F7/SYT2/ASTN2/EPDR1/SLIT2/UNC13B/PCDH10/S100A13/RASGRP1/PLCH1/S100A1/ANXA2/ENTPD4/S100A16	41/383
GO:0046873	GO:MF	GO:0046873	metal ion transmembrane transporter activity	1.76911690870058e-08	31	SCN1B/CACNA2D1/KCNS2/TRPC3/KCNS1/SLC24A2/TRPV6/KCNH7/TRPM3/KCNJ3/LOC100386406/KCNK12/NIPAL2/ASIC1/SLC20A2/KCNA2/SLC1A6/CACNG6/SLC38A2/TUSC3/NALCN/KCNQ5/KCNJ4/HCN2/KCNC2/KCNH8/KCNC1/KCNMB4/SCN2B/SCN3A/SLC9A6	31/383
GO:0022890	GO:MF	GO:0022890	inorganic cation transmembrane transporter activity	2.78328882279501e-07	34	SCN1B/CACNA2D1/KCNS2/TRPC3/KCNS1/SLC24A2/TRPV6/KCNH7/TRPM3/KCNJ3/LOC100386406/KCNK12/SLC2A13/NIPAL2/ASIC1/SLC20A2/KCNA2/SLC1A6/LOC100401662/CACNG6/SLC38A2/TUSC3/NALCN/KCNQ5/KCNJ4/HCN2/KCNC2/KCNH8/KCNC1/KCNMB4/SCN2B/SLC45A4/SCN3A/SLC9A6	34/383
GO:0005261	GO:MF	GO:0005261	monoatomic cation channel activity	3.35888313228328e-07	25	SCN1B/CACNA2D1/KCNS2/TRPC3/KCNS1/TRPV6/KCNH7/TRPM3/KCNJ3/LOC100386406/KCNK12/ASIC1/KCNA2/LOC100401662/CACNG6/NALCN/KCNQ5/KCNJ4/HCN2/KCNC2/KCNH8/KCNC1/KCNMB4/SCN2B/SCN3A	25/383
GO:0005244	GO:MF	GO:0005244	voltage-gated monoatomic ion channel activity	6.66901490564485e-07	19	SCN1B/CACNA2D1/KCNS2/KCNS1/KCNH7/KCNJ3/LOC100386406/KCNK12/CLCN2/KCNA2/CACNG6/KCNQ5/KCNJ4/HCN2/KCNC2/KCNH8/KCNC1/SCN2B/SCN3A	19/383
GO:0022832	GO:MF	GO:0022832	voltage-gated channel activity	8.23914351582176e-07	19	SCN1B/CACNA2D1/KCNS2/KCNS1/KCNH7/KCNJ3/LOC100386406/KCNK12/CLCN2/KCNA2/CACNG6/KCNQ5/KCNJ4/HCN2/KCNC2/KCNH8/KCNC1/SCN2B/SCN3A	19/383
GO:0008324	GO:MF	GO:0008324	monoatomic cation transmembrane transporter activity	1.7516466307112e-06	34	SCN1B/CACNA2D1/KCNS2/TRPC3/KCNS1/SLC24A2/TRPV6/KCNH7/TRPM3/KCNJ3/LOC100386406/KCNK12/SLC2A13/NIPAL2/ASIC1/SLC20A2/KCNA2/SLC1A6/LOC100401662/CACNG6/SLC38A2/TUSC3/NALCN/KCNQ5/KCNJ4/HCN2/KCNC2/KCNH8/KCNC1/KCNMB4/SCN2B/SLC45A4/SCN3A/SLC9A6	34/383
GO:0015075	GO:MF	GO:0015075	monoatomic ion transmembrane transporter activity	2.79187036076544e-06	38	SCN1B/CACNA2D1/KCNS2/TRPC3/KCNS1/SLC24A2/TRPV6/KCNH7/TRPM3/KCNJ3/GLRA3/LOC100386406/KCNK12/SLC2A13/NIPAL2/ASIC1/CLCN2/SLC20A2/KCNA2/SLC1A6/LOC100401662/CACNG6/SLC38A2/TUSC3/NALCN/GRIK4/KCNQ5/KCNJ4/HCN2/KCNC2/KCNH8/KCNC1/KCNMB4/SCN2B/SLC45A4/SCN3A/SFXN5/SLC9A6	38/383
GO:0005216	GO:MF	GO:0005216	monoatomic ion channel activity	2.93664911600031e-06	28	SCN1B/CACNA2D1/KCNS2/TRPC3/KCNS1/TRPV6/KCNH7/TRPM3/KCNJ3/GLRA3/LOC100386406/KCNK12/ASIC1/CLCN2/KCNA2/LOC100401662/CACNG6/NALCN/GRIK4/KCNQ5/KCNJ4/HCN2/KCNC2/KCNH8/KCNC1/KCNMB4/SCN2B/SCN3A	28/383
GO:1901702	GO:MF	GO:1901702	salt transmembrane transporter activity	2.98785875155918e-06	33	SCN1B/CACNA2D1/KCNS2/TRPC3/KCNS1/SLC24A2/TRPV6/KCNH7/TRPM3/KCNJ3/GLRA3/LOC100386406/KCNK12/ASIC1/CLCN2/SLC20A2/KCNA2/SLC1A6/CACNG6/SLC38A2/NALCN/SLC44A2/KCNQ5/KCNJ4/HCN2/KCNC2/KCNH8/KCNC1/KCNMB4/SCN2B/SCN3A/SLC17A6/SLC9A6	33/383
GO:0015318	GO:MF	GO:0015318	inorganic molecular entity transmembrane transporter activity	5.22675147854424e-06	36	SCN1B/CACNA2D1/KCNS2/TRPC3/KCNS1/SLC24A2/TRPV6/KCNH7/TRPM3/KCNJ3/GLRA3/LOC100386406/KCNK12/SLC2A13/NIPAL2/ASIC1/CLCN2/SLC20A2/KCNA2/SLC1A6/LOC100401662/CACNG6/SLC38A2/TUSC3/NALCN/KCNQ5/KCNJ4/HCN2/KCNC2/KCNH8/KCNC1/KCNMB4/SCN2B/SLC45A4/SCN3A/SLC9A6	36/383
GO:0015079	GO:MF	GO:0015079	potassium ion transmembrane transporter activity	7.95204883342997e-06	16	KCNS2/KCNS1/SLC24A2/KCNH7/KCNJ3/KCNK12/KCNA2/KCNQ5/KCNJ4/HCN2/KCNC2/KCNH8/KCNC1/KCNMB4/SCN2B/SLC9A6	16/383
GO:0022839	GO:MF	GO:0022839	monoatomic ion gated channel activity	9.13871462562177e-06	23	SCN1B/CACNA2D1/KCNS2/KCNS1/KCNH7/KCNJ3/GLRA3/LOC100386406/KCNK12/ASIC1/CLCN2/KCNA2/CACNG6/GRIK4/KCNQ5/KCNJ4/HCN2/KCNC2/KCNH8/KCNC1/KCNMB4/SCN2B/SCN3A	23/383
GO:0022836	GO:MF	GO:0022836	gated channel activity	9.79031266095352e-06	23	SCN1B/CACNA2D1/KCNS2/KCNS1/KCNH7/KCNJ3/GLRA3/LOC100386406/KCNK12/ASIC1/CLCN2/KCNA2/CACNG6/GRIK4/KCNQ5/KCNJ4/HCN2/KCNC2/KCNH8/KCNC1/KCNMB4/SCN2B/SCN3A	23/383
GO:0022803	GO:MF	GO:0022803	passive transmembrane transporter activity	2.42922278541306e-05	28	SCN1B/CACNA2D1/KCNS2/TRPC3/KCNS1/TRPV6/KCNH7/TRPM3/KCNJ3/GLRA3/LOC100386406/KCNK12/ASIC1/CLCN2/KCNA2/LOC100401662/CACNG6/NALCN/GRIK4/KCNQ5/KCNJ4/HCN2/KCNC2/KCNH8/KCNC1/KCNMB4/SCN2B/SCN3A	28/383
GO:0015267	GO:MF	GO:0015267	channel activity	2.42922278541306e-05	28	SCN1B/CACNA2D1/KCNS2/TRPC3/KCNS1/TRPV6/KCNH7/TRPM3/KCNJ3/GLRA3/LOC100386406/KCNK12/ASIC1/CLCN2/KCNA2/LOC100401662/CACNG6/NALCN/GRIK4/KCNQ5/KCNJ4/HCN2/KCNC2/KCNH8/KCNC1/KCNMB4/SCN2B/SCN3A	28/383
GO:0005267	GO:MF	GO:0005267	potassium channel activity	4.57173654095801e-05	14	KCNS2/KCNS1/KCNH7/KCNJ3/KCNK12/KCNA2/KCNQ5/KCNJ4/HCN2/KCNC2/KCNH8/KCNC1/KCNMB4/SCN2B	14/383
GO:0005249	GO:MF	GO:0005249	voltage-gated potassium channel activity	6.25365078238068e-05	12	KCNS2/KCNS1/KCNH7/KCNJ3/KCNA2/KCNQ5/KCNJ4/HCN2/KCNC2/KCNH8/KCNC1/SCN2B	12/383
GO:0022843	GO:MF	GO:0022843	voltage-gated monoatomic cation channel activity	0.000227083	13	CACNA2D1/KCNS2/KCNS1/KCNH7/KCNJ3/KCNA2/KCNQ5/KCNJ4/HCN2/KCNC2/KCNH8/KCNC1/SCN2B	13/383
GO:0043167	GO:MF	GO:0043167	ion binding	0.000436677	144	SEMA7A/EDIL3/ADAMTS17/CAMK2G/CABP1/MATN4/MMP17/MAP2K1/HTR2A/VAV3/PVALB/ESRRG/CRTAC1/TUBA8/ARL5A/HR/LMO3/TRPC3/HSPA2/EXTL2/FHL1/SEMA5B/FAT3/KALRN/MINK1/HPGD/TENM2/UNC13C/GLRA3/TSHZ1/KCNIP3/NECAB3/PAK6/SDCBP/RAB3B/SMYD2/HPCAL1/CDKL2/S100B/ATRNL1/LOC100894903/RNF144A/PAM/CIT/GNAL/MKNK2/FGFR3/CAPN2/PIM3/CSRP1/PLCH2/GALNT2/RCN2/EPHB2/AOPEP/PPT1/HMCN1/CDH6/CDH18/LOC100401662/ANKMY2/LRRK2/ARL4A/HSPA5/SP…	144/383
GO:0022857	GO:MF	GO:0022857	transmembrane transporter activity	0.000771317	43	SCN1B/CACNA2D1/KCNS2/TRPC3/KCNS1/SLC24A2/TRPV6/KCNH7/TRPM3/KCNJ3/GLRA3/LOC100386406/KCNK12/SLC2A13/NIPAL2/ASIC1/SLC2A8/CLCN2/SLC35F4/SLC20A2/KCNA2/SLC1A6/LOC100401662/CACNG6/SLC38A2/TUSC3/NALCN/SLC44A2/GRIK4/SLC22A23/KCNQ5/KCNJ4/HCN2/KCNC2/KCNH8/KCNC1/KCNMB4/SCN2B/SLC45A4/SCN3A/SFXN5/SLC17A6/SLC9A6	43/383
GO:0005215	GO:MF	GO:0005215	transporter activity	0.000963931	45	SCN1B/CACNA2D1/STARD4/KCNS2/TRPC3/KCNS1/SLC24A2/TRPV6/KCNH7/TRPM3/KCNJ3/GLRA3/LOC100386406/KCNK12/SLC2A13/NIPAL2/ASIC1/SLC2A8/CLCN2/SLC35F4/SLC20A2/KCNA2/SLC1A6/LOC100401662/CACNG6/SLC38A2/TUSC3/NALCN/SLC44A2/GRIK4/SLC22A23/KCNQ5/KCNJ4/HCN2/KCNC2/KCNH8/KCNC1/KCNMB4/SCN2B/SLC45A4/SCN3A/SFXN5/ATP9A/SLC17A6/SLC9A6	45/383
GO:0005248	GO:MF	GO:0005248	voltage-gated sodium channel activity	0.00167054	6	SCN1B/LOC100386406/NALCN/HCN2/SCN2B/SCN3A	6/383
GO:0015081	GO:MF	GO:0015081	sodium ion transmembrane transporter activity	0.00523904	12	SCN1B/SLC24A2/LOC100386406/ASIC1/SLC20A2/SLC1A6/SLC38A2/NALCN/HCN2/SCN2B/SCN3A/SLC9A6	12/383
GO:0005272	GO:MF	GO:0005272	sodium channel activity	0.00723661	7	SCN1B/LOC100386406/ASIC1/NALCN/HCN2/SCN2B/SCN3A	7/383
GO:0005515	GO:MF	GO:0005515	protein binding	0.0122715	186	BTBD3/SEMA7A/CAMK2G/CABP1/MBP/NTNG1/MAP2K1/HTR2A/TIAM1/SEC14L1/VAV3/KCNS2/CDK2AP1/FOS/TRPC3/LIN7A/HSPA2/TIAM2/TLNRD1/KCNS1/PCSK1/DIXDC1/CNTN3/FHL1/CPLX1/SEMA5B/RIMS3/KALRN/MEF2A/IGFBP6/TRPV6/RGMB/HPGD/KLHL32/IER5/ASPH/SLC2A13/ETS2/SDCBP/RAB3B/COL9A2/SMYD2/MAT2B/ZBTB34/EML6/TPM1/ATRNL1/LUC7L2/ADCYAP1/CLDN11/RUSC1/SPHKAP/SHTN1/PHLPP1/NFE2L2/BZW2/PAM/CNOT2/USH1C/CIT/GFAP/FGF14/PDYN/TNFRSF21/IRS2/NTS…	186/383
GO:0043169	GO:MF	GO:0043169	cation binding	0.031181	95	EDIL3/ADAMTS17/CABP1/MATN4/MMP17/HTR2A/VAV3/PVALB/ESRRG/CRTAC1/HR/LMO3/EXTL2/FHL1/FAT3/TENM2/UNC13C/GLRA3/TSHZ1/KCNIP3/NECAB3/SMYD2/HPCAL1/S100B/LOC100894903/RNF144A/PAM/CIT/GNAL/CAPN2/CSRP1/PLCH2/GALNT2/RCN2/AOPEP/HMCN1/CDH6/CDH18/ANKMY2/LRRK2/SPOCK2/PCDH7/ADI1/PCGF5/FBN2/DGKB/MTARC2/CALB1/GALNT1/CALN1/ZFYVE21/NPNT/TRIM2/RNF157/ZADH2/SRI/CRELD1/F7/SPON1/RNF141/ADCY5/SYT2/ASTN2/EPDR1/SLIT2/NEBL/Z…	95/383
GO:0046872	GO:MF	GO:0046872	metal ion binding	0.0366546	93	EDIL3/ADAMTS17/CABP1/MATN4/MMP17/VAV3/PVALB/ESRRG/CRTAC1/HR/LMO3/EXTL2/FHL1/FAT3/TENM2/UNC13C/TSHZ1/KCNIP3/NECAB3/SMYD2/HPCAL1/S100B/LOC100894903/RNF144A/PAM/CIT/GNAL/CAPN2/CSRP1/PLCH2/GALNT2/RCN2/AOPEP/HMCN1/CDH6/CDH18/ANKMY2/LRRK2/SPOCK2/PCDH7/ADI1/PCGF5/FBN2/DGKB/MTARC2/CALB1/GALNT1/CALN1/ZFYVE21/NPNT/TRIM2/RNF157/ZADH2/SRI/CRELD1/F7/SPON1/RNF141/ADCY5/SYT2/ASTN2/EPDR1/SLIT2/NEBL/ZKSCAN1/UNC13…	93/383
HP:0000006	HP	HP:0000006	Autosomal dominant inheritance	0.0215128	72	SCN1B/CUX1/TBR1/CAMK2G/MAP2K1/CITED2/HTR2A/TUBA8/TRPC3/CPLX1/MEF2A/TRPM3/LOC100386406/FHOD3/TSHZ1/NPTX1/COL9A2/TPM1/CLDN11/GATM/CLCN2/ELOVL4/NFE2L2/CNOT2/GNAL/GFAP/FGF14/PDYN/IRS2/FGFR3/ODC1/SLC20A2/KCNA2/CUX2/HMCN1/HECW2/CHMP2B/LOC100401662/GLS/SOX4/LRRK2/FBN2/EDNRB/NALCN/ARID1B/ARHGAP26/CRELD1/KCNQ5/HCN2/ADCY5/SYT2/CHD2/SMARCD1/KCNC2/KCNC1/KLF13/ELOVL5/AIRE/PDE3A/HS6ST1/SCN2B/INSR/SLITRK1/NPRL3…	72/126
KEGG:04921	KEGG	KEGG:04921	Oxytocin signaling pathway	0.00515532	11	CAMK2G/CACNA2D1/MAP2K1/FOS/KCNJ3/RCAN1/KCNJ4/ADCY5/CAMK4/PTGS2/PPP1CC	11/137

## Sheet: V2_P16L4_vs_V1_P16L4a
	Category	ID	Description	p.adjust	Count	geneID	GeneRatio
GO:0007399	GO:BP	GO:0007399	nervous system development	6.72841454334236e-21	72	NEUROD6/PRKCG/SYT17/GABRA5/FOXP2/PTK7/OVOL2/EGR3/VWC2L/SLIT1/EPHA3/EPOP/IFT57/FEZF2/RARB/RORB/RELN/KIRREL3/UST/SPTBN2/LRRTM2/CPNE6/ADGRL2/LRTM2/BRINP2/FOXO6/SOX11/EFNB3/FOXG1/TMEM108/ARNT2/MESP1/GIT1/DBN1/RARA/C1QL3/TRPV2/C1QL1/EFNB2/ETV6/RASAL1/SEMA3A/SEZ6/GPRIN1/NYAP2/MARK4/FSTL4/MYO16/ALCAM/ARHGEF2/GABRA2/DACT1/NAV3/NUMBL/SEMA6A/ZMIZ1/DPYSL5/CDH2/LRRN3/PPP1R9B/SULF2/EPHA7/NR1D1/CAMK1D/ETV1/SRG…	72/279
GO:0065007	GO:BP	GO:0065007	biological regulation	1.94707640922917e-20	199	NEUROD6/CYP26A1/KCNG1/TSHZ3/PRKCG/GABRG1/SYT17/EPHA5/CCSAP/GABRA5/FOXP2/PTK7/MET/OVOL2/ANO3/EGR3/VWC2L/STARD13/SATB1/GPR88/DHRS3/SNAI2/WWC1/PIK3R1/BARX2/EPHA3/EPOP/UNC5D/IFT57/STAT5A/KCNH3/FEZF2/LDB2/RARB/RORB/RELN/C1QL4/UST/BCL11A/TIMP2/TGFB3/CD47/ADRA2A/CDH8/DYRK2/SPTBN2/RFTN1/NKAIN1/LRRTM2/CREB3L1/CRYM/RIMS4/GADD45A/CNIH3/CORT/CPNE6/GRM5/SHISA6/CDK1/PRR7/CCKBR/PTPN3/RAB3C/ADGRL2/LRTM2/BRINP2/R…	199/279
GO:0050789	GO:BP	GO:0050789	regulation of biological process	3.87665157509167e-19	193	NEUROD6/KCNG1/TSHZ3/PRKCG/GABRG1/SYT17/EPHA5/CCSAP/GABRA5/FOXP2/PTK7/MET/OVOL2/EGR3/VWC2L/STARD13/SATB1/GPR88/DHRS3/SNAI2/WWC1/PIK3R1/BARX2/EPHA3/EPOP/UNC5D/IFT57/STAT5A/KCNH3/FEZF2/LDB2/RARB/RORB/RELN/C1QL4/UST/BCL11A/TIMP2/TGFB3/CD47/ADRA2A/CDH8/DYRK2/SPTBN2/RFTN1/NKAIN1/LRRTM2/CREB3L1/CRYM/GADD45A/CNIH3/CORT/CPNE6/GRM5/SHISA6/CDK1/PRR7/CCKBR/PTPN3/RAB3C/ADGRL2/LRTM2/BRINP2/RSPO3/RAPGEF2/GLYR1/…	193/279
GO:0048731	GO:BP	GO:0048731	system development	4.31267776901537e-18	91	NEUROD6/PRKCG/SYT17/GABRA5/FOXP2/PTK7/OVOL2/EGR3/VWC2L/STARD13/SLIT1/DHRS3/SNAI2/BARX2/EPHA3/EPOP/IFT57/FEZF2/RARB/RORB/RELN/KIRREL3/UST/TGFB3/SPTBN2/LRRTM2/CREB3L1/CPNE6/CCKBR/NECTIN1/ADGRL2/LRTM2/BRINP2/RSPO3/BHLHA15/FOXO6/SOX11/EFNB3/FOXG1/TMEM108/ARNT2/FKBP10/MESP1/GIT1/DBN1/RARA/C1QL3/TRPV2/C1QL1/EFNB2/ETV6/RASAL1/SEMA3A/SEZ6/TAMALIN/GPRIN1/NYAP2/CTSK/MARK4/FSTL4/MYO16/ALCAM/ARHGEF2/ACTN2/GA…	91/279
GO:0050794	GO:BP	GO:0050794	regulation of cellular process	1.85136984900889e-16	182	NEUROD6/KCNG1/TSHZ3/PRKCG/SYT17/EPHA5/CCSAP/FOXP2/PTK7/MET/OVOL2/EGR3/VWC2L/STARD13/SATB1/GPR88/DHRS3/SNAI2/WWC1/PIK3R1/BARX2/EPHA3/EPOP/UNC5D/IFT57/STAT5A/KCNH3/FEZF2/LDB2/RARB/RORB/RELN/C1QL4/UST/BCL11A/TGFB3/CD47/ADRA2A/CDH8/DYRK2/SPTBN2/RFTN1/LRRTM2/CREB3L1/CRYM/GADD45A/CNIH3/CORT/CPNE6/GRM5/SHISA6/CDK1/PRR7/CCKBR/PTPN3/RAB3C/ADGRL2/LRTM2/BRINP2/RSPO3/RAPGEF2/GLYR1/KCNAB1/BHLHA15/PDE9A/FOXO6/…	182/279
GO:0007275	GO:BP	GO:0007275	multicellular organism development	2.62891991211154e-15	96	NEUROD6/PRKCG/SYT17/GABRA5/FOXP2/PTK7/MET/OVOL2/EGR3/VWC2L/STARD13/SLIT1/DHRS3/SNAI2/PIK3R1/BARX2/EPHA3/EPOP/IFT57/FEZF2/RARB/RORB/RELN/KIRREL3/UST/TGFB3/SPTBN2/LRRTM2/CREB3L1/CPNE6/CCKBR/NECTIN1/ADGRL2/LRTM2/BRINP2/RSPO3/BHLHA15/FOXO6/SOX11/EFNB3/FOXG1/TMEM108/ARNT2/FKBP10/MESP1/GIT1/NELL1/TMEM178A/DBN1/RARA/C1QL3/TRPV2/C1QL1/EFNB2/ETV6/RASAL1/SEMA3A/SEZ6/TAMALIN/GPRIN1/NYAP2/CTSK/MARK4/FSTL4/MY…	96/279
GO:0022008	GO:BP	GO:0022008	neurogenesis	9.55948661408459e-14	51	SYT17/GABRA5/PTK7/VWC2L/SLIT1/EPHA3/EPOP/FEZF2/RARB/RORB/RELN/KIRREL3/UST/CPNE6/BRINP2/FOXO6/SOX11/EFNB3/FOXG1/TMEM108/MESP1/GIT1/DBN1/TRPV2/C1QL1/EFNB2/ETV6/RASAL1/SEMA3A/SEZ6/GPRIN1/NYAP2/FSTL4/MYO16/ALCAM/ARHGEF2/NAV3/NUMBL/ZMIZ1/DPYSL5/CDH2/PPP1R9B/EPHA7/NR1D1/CAMK1D/ETV1/SRGAP2/CAMSAP1/XRCC5/FLRT3/SATB2	51/279
GO:0032501	GO:BP	GO:0032501	multicellular organismal process	7.1374350967256e-13	123	NEUROD6/PRKCG/SYT17/GABRA5/FOXP2/PTK7/MET/OVOL2/EGR3/VWC2L/STARD13/SLIT1/GPR88/DHRS3/SNAI2/WWC1/PIK3R1/BARX2/EPHA3/EPOP/IFT57/STAT5A/FEZF2/LDB2/RARB/RORB/RELN/KIRREL3/UST/TGFB3/ADRA2A/SPTBN2/LRRTM2/CREB3L1/CRYM/GADD45A/CPNE6/GRM5/SHISA6/PRR7/CCKBR/NECTIN1/ADGRL2/LRTM2/BRINP2/RSPO3/BHLHA15/PDE9A/FOXO6/SOX11/EFNB3/FOXG1/FCHO1/RDH12/TMEM108/ARNT2/FKBP10/MESP1/GIT1/NELL1/CTPS1/TMEM178A/DBN1/RARA/C1QL…	123/279
GO:0030182	GO:BP	GO:0030182	neuron differentiation	7.13776723795696e-12	43	SYT17/GABRA5/PTK7/VWC2L/SLIT1/EPHA3/EPOP/FEZF2/RORB/RELN/KIRREL3/UST/CPNE6/BRINP2/FOXO6/SOX11/EFNB3/FOXG1/TMEM108/GIT1/DBN1/TRPV2/C1QL1/EFNB2/RASAL1/SEMA3A/SEZ6/GPRIN1/NYAP2/FSTL4/MYO16/ALCAM/ARHGEF2/NUMBL/ZMIZ1/DPYSL5/PPP1R9B/EPHA7/CAMK1D/ETV1/SRGAP2/CAMSAP1/FLRT3	43/279
GO:0034330	GO:BP	GO:0034330	cell junction organization	1.30463840339883e-11	32	SNAI2/PIK3R1/EPHA3/RELN/KIRREL3/TGFB3/CDH8/SPTBN2/LRRTM2/CPNE6/GRM5/SHISA6/NECTIN1/ADGRL2/LRTM2/TMEM108/DBN1/C1QL3/C1QL1/SEZ6/ACTN2/GABRA2/CDKL5/NUMBL/CDH2/PTPRA/LRRN3/PTPN23/EPHA7/CLN3/SRGAP2/FLRT3	32/279
GO:0048699	GO:BP	GO:0048699	generation of neurons	1.35083926581414e-11	44	SYT17/GABRA5/PTK7/VWC2L/SLIT1/EPHA3/EPOP/FEZF2/RORB/RELN/KIRREL3/UST/CPNE6/BRINP2/FOXO6/SOX11/EFNB3/FOXG1/TMEM108/GIT1/DBN1/TRPV2/C1QL1/EFNB2/RASAL1/SEMA3A/SEZ6/GPRIN1/NYAP2/FSTL4/MYO16/ALCAM/ARHGEF2/NUMBL/ZMIZ1/DPYSL5/PPP1R9B/EPHA7/CAMK1D/ETV1/SRGAP2/CAMSAP1/FLRT3/SATB2	44/279
GO:0032502	GO:BP	GO:0032502	developmental process	1.59115126649508e-11	107	NEUROD6/PRKCG/SYT17/GABRA5/FOXP2/PTK7/MET/OVOL2/EGR3/VWC2L/STARD13/SLIT1/DHRS3/SNAI2/WWC1/PIK3R1/BARX2/EPHA3/EPOP/IFT57/STAT5A/FEZF2/LDB2/RARB/RORB/RELN/KIRREL3/C1QL4/UST/TGFB3/SPTBN2/LRRTM2/CREB3L1/CPNE6/SHISA6/CDK1/PRR7/CCKBR/NECTIN1/ADGRL2/LRTM2/BRINP2/RSPO3/BHLHA15/FOXO6/SOX11/EFNB3/FOXG1/TMEM108/ARNT2/FKBP10/MESP1/GIT1/NELL1/TMEM178A/DBN1/RARA/C1QL3/TRPV2/C1QL1/EFNB2/ETV6/RASAL1/SEMA3A/SEZ6/…	107/279
GO:0023052	GO:BP	GO:0023052	signaling	1.64666079531167e-11	113	PRKCG/GABRG1/EPHA5/GABRA5/PTK7/MET/OVOL2/EGR3/VWC2L/STARD13/GPR88/DHRS3/SNAI2/WWC1/PIK3R1/EPHA3/UNC5D/IFT57/STAT5A/RARB/RORB/RELN/C1QL4/TGFB3/ADRA2A/CDH8/DYRK2/RFTN1/LRRTM2/CREB3L1/GADD45A/CNIH3/CORT/GRM5/SHISA6/CCKBR/ADGRL2/RSPO3/RAPGEF2/BHLHA15/PDE9A/SOX11/EFNB3/FCHO1/ARHGAP20/TMEM108/ADGRL3/GIT1/DBN1/RARA/RAPGEF5/TERF2IP/EFNB2/RASAL1/HACD3/PSD3/RYR2/RNF185/SEZ6/GRK5/TAMALIN/GPD1L/GRIK2/PIK3C2B…	113/279
GO:0048518	GO:BP	GO:0048518	positive regulation of biological process	1.91149631410043e-11	111	NEUROD6/PRKCG/SYT17/PTK7/MET/OVOL2/EGR3/VWC2L/SNAI2/WWC1/PIK3R1/BARX2/EPHA3/IFT57/STAT5A/FEZF2/LDB2/RARB/RORB/RELN/TGFB3/CD47/ADRA2A/DYRK2/RFTN1/LRRTM2/CREB3L1/GADD45A/CPNE6/GRM5/CDK1/PRR7/CCKBR/ADGRL2/LRTM2/BRINP2/RSPO3/GLYR1/BHLHA15/PDE9A/FOXO6/SOX11/EFNB3/FOXG1/FCHO1/TMEM108/ARNT2/MESP1/GIT1/NELL1/DBN1/RARA/TRPV2/PSMC2/TERF2IP/EFNB2/ETV6/NDFIP2/RASAL1/HACD3/RYR2/TOX3/RNF185/GRK5/TAMALIN/FXYD1/…	111/279
GO:0048666	GO:BP	GO:0048666	neuron development	2.08334162174122e-11	38	SYT17/GABRA5/PTK7/SLIT1/EPHA3/FEZF2/RORB/RELN/KIRREL3/UST/CPNE6/FOXO6/EFNB3/FOXG1/TMEM108/GIT1/DBN1/TRPV2/C1QL1/EFNB2/RASAL1/SEMA3A/SEZ6/GPRIN1/NYAP2/FSTL4/MYO16/ALCAM/NUMBL/ZMIZ1/DPYSL5/PPP1R9B/EPHA7/CAMK1D/ETV1/SRGAP2/CAMSAP1/FLRT3	38/279
GO:0008283	GO:BP	GO:0008283	cell population proliferation	2.178755095889e-11	71	SYT17/PTK7/OVOL2/EGR3/SLIT1/SNAI2/PIK3R1/EPHA3/IFT57/STAT5A/FEZF2/RARB/RELN/KIRREL3/C1QL4/UST/TGFB3/CPNE6/CCKBR/FOXO6/SOX11/EFNB3/FOXG1/TMEM108/NELL1/CTPS1/DBN1/RARA/TRPV2/EFNB2/ETV6/RASAL1/SEMA3A/SEZ6/GRK5/TAMALIN/GPRIN1/NYAP2/MARK4/FSTL4/MYO16/ALCAM/LARP1/ARHGEF2/KCNF1/GFY/ACTN2/MTA3/CDKL5/NUMBL/ZMIZ1/DPYSL5/CDH2/PPP1R9B/SULF2/PTPN23/EPHA7/CLN3/NR1D1/FGF17/CAMK1D/IGF1/ETV1/SRGAP2/CAMSAP1/COPS8/…	71/279
GO:0007154	GO:BP	GO:0007154	cell communication	2.49736757052255e-11	114	PRKCG/GABRG1/EPHA5/GABRA5/PTK7/MET/OVOL2/EGR3/VWC2L/STARD13/GPR88/DHRS3/SNAI2/WWC1/PIK3R1/EPHA3/UNC5D/IFT57/STAT5A/RARB/RORB/RELN/C1QL4/TGFB3/ADRA2A/CDH8/DYRK2/RFTN1/LRRTM2/CREB3L1/GADD45A/CNIH3/CORT/GRM5/SHISA6/CCKBR/ADGRL2/RSPO3/RAPGEF2/BHLHA15/PDE9A/SOX11/EFNB3/FCHO1/ARHGAP20/TMEM108/ADGRL3/GIT1/DBN1/RARA/RAPGEF5/TERF2IP/EFNB2/RASAL1/HACD3/PSD3/RYR2/RNF185/SEZ6/GRK5/TAMALIN/GPD1L/GRIK2/PIK3C2B…	114/279
GO:0048856	GO:BP	GO:0048856	anatomical structure development	3.19983164850579e-11	102	NEUROD6/PRKCG/SYT17/GABRA5/FOXP2/PTK7/MET/OVOL2/EGR3/VWC2L/STARD13/SLIT1/DHRS3/SNAI2/PIK3R1/BARX2/EPHA3/EPOP/IFT57/STAT5A/FEZF2/LDB2/RARB/RORB/RELN/KIRREL3/UST/TGFB3/SPTBN2/LRRTM2/CREB3L1/CPNE6/CDK1/PRR7/CCKBR/NECTIN1/ADGRL2/LRTM2/BRINP2/RSPO3/BHLHA15/FOXO6/SOX11/EFNB3/FOXG1/TMEM108/ARNT2/FKBP10/MESP1/GIT1/NELL1/TMEM178A/DBN1/RARA/C1QL3/TRPV2/C1QL1/EFNB2/ETV6/RASAL1/SEMA3A/SEZ6/ACTA1/TAMALIN/GPRI…	102/279
GO:0120036	GO:BP	GO:0120036	plasma membrane bounded cell projection organization	1.00318438847981e-10	45	SYT17/PTK7/SLIT1/PIK3R1/EPHA3/IFT57/FEZF2/RELN/KIRREL3/UST/CPNE6/FOXO6/EFNB3/FOXG1/TMEM108/DBN1/TRPV2/EFNB2/RASAL1/SEMA3A/SEZ6/GPRIN1/NYAP2/MARK4/FSTL4/MYO16/ALCAM/KCNF1/GFY/ACTN2/CDKL5/NUMBL/DPYSL5/PPP1R9B/PTPN23/EPHA7/CLN3/CAMK1D/ETV1/SRGAP2/CAMSAP1/VAV2/FLRT3/BAG4/KIT	45/279
GO:0030030	GO:BP	GO:0030030	cell projection organization	1.73133453678343e-10	45	SYT17/PTK7/SLIT1/PIK3R1/EPHA3/IFT57/FEZF2/RELN/KIRREL3/UST/CPNE6/FOXO6/EFNB3/FOXG1/TMEM108/DBN1/TRPV2/EFNB2/RASAL1/SEMA3A/SEZ6/GPRIN1/NYAP2/MARK4/FSTL4/MYO16/ALCAM/KCNF1/GFY/ACTN2/CDKL5/NUMBL/DPYSL5/PPP1R9B/PTPN23/EPHA7/CLN3/CAMK1D/ETV1/SRGAP2/CAMSAP1/VAV2/FLRT3/BAG4/KIT	45/279
GO:0048522	GO:BP	GO:0048522	positive regulation of cellular process	2.46661365902663e-10	102	NEUROD6/PRKCG/SYT17/PTK7/MET/OVOL2/EGR3/VWC2L/SNAI2/WWC1/PIK3R1/BARX2/EPHA3/STAT5A/FEZF2/LDB2/RARB/RORB/RELN/TGFB3/CD47/ADRA2A/DYRK2/LRRTM2/GADD45A/CPNE6/GRM5/CDK1/PRR7/CCKBR/ADGRL2/LRTM2/BRINP2/RSPO3/GLYR1/BHLHA15/SOX11/EFNB3/FOXG1/FCHO1/TMEM108/ARNT2/MESP1/GIT1/NELL1/DBN1/RARA/TRPV2/TERF2IP/EFNB2/ETV6/RASAL1/RYR2/TOX3/RNF185/GRK5/TAMALIN/FXYD1/GPD1L/GRIK2/ZMIZ2/MARK4/SLX1A/LARP1/ARHGEF2/ACTN2/D…	102/279
GO:0065008	GO:BP	GO:0065008	regulation of biological quality	2.92454127951283e-10	63	CYP26A1/PRKCG/GABRA5/ANO3/GPR88/PIK3R1/RELN/ADRA2A/CDH8/SPTBN2/LRRTM2/CRYM/RIMS4/GRM5/SHISA6/CCKBR/PTPN3/ADGRL2/LRTM2/SOX11/RDH12/TMEM108/KCNA4/GIT1/DBN1/C1QL3/TRPV2/C1QL1/HACD3/RYR2/SEMA3A/SEZ6/FXYD1/GPD1L/GRIK2/CTSK/FSTL4/LARP1/ACTN2/GABRA2/DACT1/CDKL5/CDH2/LRRN3/PCSK6/EPHA7/CLN3/NR1D1/IGF1/GSK3A/ZNF207/CACNA1I/C2CD2L/MTMR9/PCSK2/VAV2/FLRT3/DOCK4/GPR27/DOC2A/BAG4/KIT/SNX27	63/279
GO:0031175	GO:BP	GO:0031175	neuron projection development	5.70098554878519e-10	33	SYT17/PTK7/SLIT1/EPHA3/FEZF2/RELN/KIRREL3/UST/CPNE6/FOXO6/EFNB3/FOXG1/TMEM108/DBN1/TRPV2/EFNB2/RASAL1/SEMA3A/SEZ6/GPRIN1/NYAP2/FSTL4/MYO16/ALCAM/NUMBL/DPYSL5/PPP1R9B/EPHA7/CAMK1D/ETV1/SRGAP2/CAMSAP1/FLRT3	33/279
GO:0051128	GO:BP	GO:0051128	regulation of cellular component organization	6.98284717552819e-10	58	PRKCG/SYT17/CCSAP/PTK7/MET/SNAI2/PIK3R1/EPHA3/FEZF2/RELN/UST/TGFB3/CD47/CDH8/SPTBN2/LRRTM2/CPNE6/CDK1/ADGRL2/LRTM2/EFNB3/GIT1/DBN1/C1QL3/TRPV2/C1QL1/TERF2IP/EFNB2/RASAL1/SEMA3A/SEZ6/FBXW5/MARK4/FSTL4/SLX1A/ARHGEF2/ACTN2/DACT1/NAV3/CDKL5/DPYSL5/CDH2/PTPRA/LRRN3/PPP1R9B/PTPN23/TOM1/EPHA7/CLN3/CAMK1D/IGF1/GSK3A/ZNF207/CAMSAP1/XRCC5/FLRT3/DOC2A/BAG4	58/279
GO:0048468	GO:BP	GO:0048468	cell development	1.22962649904701e-09	61	SYT17/GABRA5/PTK7/MET/OVOL2/EGR3/SLIT1/SNAI2/PIK3R1/EPHA3/STAT5A/FEZF2/RARB/RORB/RELN/KIRREL3/UST/CPNE6/PRR7/BHLHA15/FOXO6/SOX11/EFNB3/FOXG1/TMEM108/GIT1/TMEM178A/DBN1/RARA/TRPV2/C1QL1/EFNB2/ETV6/RASAL1/SEMA3A/SEZ6/ACTA1/GPRIN1/NYAP2/FSTL4/MYO16/ALCAM/ACTN2/NUMBL/ZMIZ1/DPYSL5/CDH2/PPP1R9B/SULF2/EPHA7/NR1D1/CAMK1D/IGF1/GSK3A/ETV1/SRGAP2/CAMSAP1/XRCC5/FLRT3/SATB2/KIT	61/279
GO:0050808	GO:BP	GO:0050808	synapse organization	3.73928664689608e-09	23	RELN/KIRREL3/CDH8/SPTBN2/LRRTM2/CPNE6/GRM5/SHISA6/ADGRL2/LRTM2/TMEM108/DBN1/C1QL3/C1QL1/SEZ6/GABRA2/CDKL5/CDH2/LRRN3/EPHA7/CLN3/SRGAP2/FLRT3	23/279
GO:0030154	GO:BP	GO:0030154	cell differentiation	6.64024171435956e-09	76	NEUROD6/SYT17/GABRA5/PTK7/MET/OVOL2/EGR3/VWC2L/SLIT1/SNAI2/PIK3R1/BARX2/EPHA3/EPOP/STAT5A/FEZF2/RARB/RORB/RELN/KIRREL3/C1QL4/UST/TGFB3/CPNE6/CDK1/PRR7/BRINP2/BHLHA15/FOXO6/SOX11/EFNB3/FOXG1/TMEM108/MESP1/GIT1/NELL1/TMEM178A/DBN1/RARA/TRPV2/C1QL1/EFNB2/ETV6/RASAL1/SEMA3A/SEZ6/ACTA1/TAMALIN/GPRIN1/NYAP2/FSTL4/MYO16/ALCAM/ARHGEF2/ACTN2/NAV3/NUMBL/SEMA6A/ZMIZ1/DPYSL5/CDH2/PPP1R9B/SULF2/DNPH1/EPHA7/NR…	76/279
GO:0048869	GO:BP	GO:0048869	cellular developmental process	6.64024171435956e-09	76	NEUROD6/SYT17/GABRA5/PTK7/MET/OVOL2/EGR3/VWC2L/SLIT1/SNAI2/PIK3R1/BARX2/EPHA3/EPOP/STAT5A/FEZF2/RARB/RORB/RELN/KIRREL3/C1QL4/UST/TGFB3/CPNE6/CDK1/PRR7/BRINP2/BHLHA15/FOXO6/SOX11/EFNB3/FOXG1/TMEM108/MESP1/GIT1/NELL1/TMEM178A/DBN1/RARA/TRPV2/C1QL1/EFNB2/ETV6/RASAL1/SEMA3A/SEZ6/ACTA1/TAMALIN/GPRIN1/NYAP2/FSTL4/MYO16/ALCAM/ARHGEF2/ACTN2/NAV3/NUMBL/SEMA6A/ZMIZ1/DPYSL5/CDH2/PPP1R9B/SULF2/DNPH1/EPHA7/NR…	76/279
GO:0048519	GO:BP	GO:0048519	negative regulation of biological process	1.17559406118481e-08	98	TSHZ3/PRKCG/FOXP2/MET/OVOL2/EGR3/VWC2L/STARD13/SATB1/DHRS3/SNAI2/WWC1/PIK3R1/BARX2/EPHA3/IFT57/FEZF2/RARB/RORB/C1QL4/BCL11A/TIMP2/TGFB3/ADRA2A/DYRK2/SPTBN2/LRRTM2/CREB3L1/CRYM/GADD45A/SHISA6/CDK1/PTPN3/BRINP2/KCNAB1/BHLHA15/SOX11/EFNB3/FOXG1/LOC100393688/BACH2/GIT1/NELL1/TMEM178A/RARA/RECQL5/TERF2IP/EFNB2/ETV6/NDFIP2/RASAL1/RYR2/SEMA3A/TOX3/SIN3B/CXXC5/GRK5/TAMALIN/GPD1L/PIK3C2B/CTSK/FSTL4/LARP1/…	98/279
GO:0050896	GO:BP	GO:0050896	response to stimulus	2.48432830033996e-08	131	CYP26A1/PRKCG/EPHA5/GABRA5/PTK7/MET/OVOL2/EGR3/VWC2L/STARD13/SLIT1/GPR88/DHRS3/SNAI2/WWC1/PIK3R1/EPHA3/UNC5D/IFT57/STAT5A/FEZF2/RARB/RORB/RELN/C1QL4/TGFB3/CD47/ADRA2A/CDH8/DYRK2/GSTO1/RFTN1/CREB3L1/GADD45A/CNIH3/CORT/CPNE6/GRM5/SHISA6/CCKBR/ADGRL2/BRINP2/RSPO3/RAPGEF2/BHLHA15/PDE9A/SOX11/EFNB3/FCHO1/ARHGAP20/RDH12/TMEM108/ARNT2/ADGRL3/BACH2/FKBP10/CHCHD6/GIT1/RARA/RAPGEF5/TRPV2/PSMA2/RECQL5/TERF2…	131/279
GO:0048523	GO:BP	GO:0048523	negative regulation of cellular process	6.95729460677686e-08	92	TSHZ3/FOXP2/MET/OVOL2/EGR3/VWC2L/STARD13/SATB1/DHRS3/SNAI2/WWC1/PIK3R1/BARX2/EPHA3/IFT57/FEZF2/RARB/RORB/C1QL4/BCL11A/TGFB3/ADRA2A/DYRK2/SPTBN2/LRRTM2/CREB3L1/CRYM/GADD45A/SHISA6/CDK1/PTPN3/BRINP2/KCNAB1/BHLHA15/SOX11/EFNB3/FOXG1/LOC100393688/BACH2/GIT1/NELL1/TMEM178A/RARA/RECQL5/TERF2IP/EFNB2/ETV6/NDFIP2/RASAL1/RYR2/SEMA3A/TOX3/SIN3B/CXXC5/GRK5/TAMALIN/GPD1L/PIK3C2B/FSTL4/LARP1/ARHGEF2/ACTN2/DAC…	92/279
GO:0048812	GO:BP	GO:0048812	neuron projection morphogenesis	7.56075733284591e-08	24	SYT17/SLIT1/FEZF2/RELN/KIRREL3/UST/CPNE6/EFNB3/FOXG1/TMEM108/DBN1/TRPV2/RASAL1/SEMA3A/NYAP2/FSTL4/MYO16/ALCAM/NUMBL/DPYSL5/EPHA7/ETV1/SRGAP2/FLRT3	24/279
GO:0007267	GO:BP	GO:0007267	cell-cell signaling	7.6667273446926e-08	40	PRKCG/GABRG1/GABRA5/PTK7/EGR3/SNAI2/RELN/ADRA2A/CDH8/LRRTM2/GRM5/SHISA6/RSPO3/BHLHA15/SOX11/EFNB3/TMEM108/GIT1/DBN1/RYR2/SEZ6/GRIK2/GABRA2/DACT1/PNOC/CDKL5/USP46/CDH2/PTPRA/SULF2/PTPN23/EPHA7/CLN3/NR1D1/AMER2/KCTD13/GSK3A/C2CD2L/GPR27/DOC2A	40/279
GO:0051716	GO:BP	GO:0051716	cellular response to stimulus	7.90531134766727e-08	116	CYP26A1/PRKCG/EPHA5/PTK7/MET/OVOL2/EGR3/VWC2L/STARD13/GPR88/DHRS3/SNAI2/WWC1/PIK3R1/EPHA3/UNC5D/IFT57/STAT5A/RARB/RORB/RELN/C1QL4/TGFB3/ADRA2A/DYRK2/GSTO1/RFTN1/CREB3L1/GADD45A/CNIH3/CORT/CPNE6/GRM5/SHISA6/CCKBR/ADGRL2/BRINP2/RSPO3/RAPGEF2/BHLHA15/PDE9A/SOX11/EFNB3/FCHO1/ARHGAP20/RDH12/TMEM108/ADGRL3/CHCHD6/GIT1/RARA/RAPGEF5/RECQL5/TERF2IP/EFNB2/RASAL1/HACD3/PSD3/RYR2/RNF185/SEZ6/GRK5/TAMALIN/GPD…	116/279
GO:0007165	GO:BP	GO:0007165	signal transduction	1.02330753578755e-07	99	EPHA5/PTK7/MET/OVOL2/VWC2L/STARD13/GPR88/DHRS3/SNAI2/WWC1/PIK3R1/EPHA3/UNC5D/IFT57/STAT5A/RARB/RORB/RELN/C1QL4/TGFB3/ADRA2A/DYRK2/RFTN1/CREB3L1/GADD45A/CNIH3/CORT/GRM5/SHISA6/CCKBR/ADGRL2/RSPO3/RAPGEF2/BHLHA15/PDE9A/SOX11/EFNB3/FCHO1/ARHGAP20/TMEM108/ADGRL3/GIT1/RARA/RAPGEF5/TERF2IP/EFNB2/RASAL1/HACD3/PSD3/RYR2/RNF185/SEZ6/GRK5/TAMALIN/GPD1L/GRIK2/PIK3C2B/MARK4/RHOBTB2/FSTL4/LARP1/ACTN2/DACT1/PNO…	99/279
GO:0120039	GO:BP	GO:0120039	plasma membrane bounded cell projection morphogenesis	1.68080739809566e-07	24	SYT17/SLIT1/FEZF2/RELN/KIRREL3/UST/CPNE6/EFNB3/FOXG1/TMEM108/DBN1/TRPV2/RASAL1/SEMA3A/NYAP2/FSTL4/MYO16/ALCAM/NUMBL/DPYSL5/EPHA7/ETV1/SRGAP2/FLRT3	24/279
GO:0048858	GO:BP	GO:0048858	cell projection morphogenesis	1.87821196821663e-07	24	SYT17/SLIT1/FEZF2/RELN/KIRREL3/UST/CPNE6/EFNB3/FOXG1/TMEM108/DBN1/TRPV2/RASAL1/SEMA3A/NYAP2/FSTL4/MYO16/ALCAM/NUMBL/DPYSL5/EPHA7/ETV1/SRGAP2/FLRT3	24/279
GO:0009653	GO:BP	GO:0009653	anatomical structure morphogenesis	2.65112370909938e-07	57	SYT17/PTK7/MET/OVOL2/EGR3/STARD13/SLIT1/DHRS3/BARX2/IFT57/FEZF2/RARB/RORB/RELN/KIRREL3/UST/TGFB3/SPTBN2/CREB3L1/CPNE6/NECTIN1/RSPO3/SOX11/EFNB3/FOXG1/TMEM108/FKBP10/MESP1/DBN1/RARA/TRPV2/EFNB2/RASAL1/SEMA3A/ACTA1/TAMALIN/NYAP2/FSTL4/MYO16/ALCAM/ARHGEF2/ACTN2/NUMBL/SEMA6A/ZMIZ1/DPYSL5/CDH2/SULF2/EPHA7/GSK3A/ETV1/SRGAP2/CAMSAP1/FLRT3/SATB2/EFNA3/KIT	57/279
GO:0032989	GO:BP	GO:0032989	cellular component morphogenesis	3.10208942170836e-07	26	SYT17/SLIT1/FEZF2/RELN/KIRREL3/UST/CPNE6/EFNB3/FOXG1/TMEM108/DBN1/TRPV2/RASAL1/SEMA3A/ACTA1/NYAP2/FSTL4/MYO16/ALCAM/ACTN2/NUMBL/DPYSL5/EPHA7/ETV1/SRGAP2/FLRT3	26/279
GO:0032990	GO:BP	GO:0032990	cell part morphogenesis	5.20308246355939e-07	24	SYT17/SLIT1/FEZF2/RELN/KIRREL3/UST/CPNE6/EFNB3/FOXG1/TMEM108/DBN1/TRPV2/RASAL1/SEMA3A/NYAP2/FSTL4/MYO16/ALCAM/NUMBL/DPYSL5/EPHA7/ETV1/SRGAP2/FLRT3	24/279
GO:0050793	GO:BP	GO:0050793	regulation of developmental process	1.22998754354783e-06	52	SYT17/PTK7/OVOL2/EGR3/VWC2L/SNAI2/WWC1/PIK3R1/FEZF2/RARB/RORB/RELN/C1QL4/UST/TGFB3/LRRTM2/CREB3L1/CPNE6/ADGRL2/LRTM2/BRINP2/BHLHA15/FOXO6/SOX11/EFNB3/FOXG1/NELL1/TMEM178A/DBN1/RARA/TRPV2/RASAL1/SEMA3A/SEZ6/CTSK/FSTL4/ARHGEF2/NUMBL/SEMA6A/ZMIZ1/DPYSL5/LRRN3/EPHA7/NR1D1/CAMK1D/IGF1/GSK3A/CAMSAP1/XRCC5/FLRT3/EFNA3/KIT	52/279
GO:0051049	GO:BP	GO:0051049	regulation of transport	2.74155740112241e-06	40	KCNG1/PRKCG/PIK3R1/EPHA3/KCNH3/RELN/TGFB3/CD47/ADRA2A/NKAIN1/LRRTM2/CNIH3/GRM5/PTPN3/RAB3C/KCNAB1/SOX11/KCNA4/GIT1/TRPV2/NDFIP2/KCNIP1/RYR2/FXYD1/GPD1L/KCNF1/ACTN2/NKAIN2/CDH2/PTPN23/CLN3/NR1D1/CAMK1D/IGF1/GSK3A/CACNA1I/C2CD2L/GPR27/DOC2A/BAG4	40/279
GO:0007155	GO:BP	GO:0007155	cell adhesion	5.20939243247756e-06	36	CD24/EGR3/SNAI2/PIK3R1/EPHA3/UNC5D/PCDH20/KIRREL3/CD47/CDH8/NECTIN1/EFNB3/FCHO1/CNTNAP5/RARA/PCDH19/PCDH9/EFNB2/CNTNAP4/ALCAM/ACTN2/NCAM2/SEMA6A/ZMIZ1/MAGI1/CDH2/PTPRA/SPINT2/ARVCF/PTPN23/EPHA7/IGF1/FLRT3/LOC100398424/BAG4/KIT	36/279
GO:0016477	GO:BP	GO:0016477	cell migration	5.77662205740409e-06	38	PTK7/MET/OVOL2/EGR3/STARD13/SLIT1/SNAI2/WWC1/PIK3R1/STAT5A/FEZF2/LDB2/RELN/KIRREL3/ADRA2A/GADD45A/FOXG1/EFNB2/TAMALIN/NAV3/ZMIZ1/CDH2/PPP1R9B/PTPN23/CLN3/KCTD13/CAMK1D/IGF1/GSK3A/SRGAP2/SPNS2/VAV2/FLRT3/SATB2/DOCK4/UBE2I/BAG4/KIT	38/279
GO:0007268	GO:BP	GO:0007268	chemical synaptic transmission	5.87950089772895e-06	22	PRKCG/EGR3/RELN/ADRA2A/CDH8/LRRTM2/GRM5/SHISA6/EFNB3/TMEM108/GIT1/DBN1/SEZ6/GRIK2/PNOC/CDKL5/USP46/PTPRA/EPHA7/CLN3/KCTD13/DOC2A	22/279
GO:0098916	GO:BP	GO:0098916	anterograde trans-synaptic signaling	5.87950089772895e-06	22	PRKCG/EGR3/RELN/ADRA2A/CDH8/LRRTM2/GRM5/SHISA6/EFNB3/TMEM108/GIT1/DBN1/SEZ6/GRIK2/PNOC/CDKL5/USP46/PTPRA/EPHA7/CLN3/KCTD13/DOC2A	22/279
GO:0000902	GO:BP	GO:0000902	cell morphogenesis	6.37633233719384e-06	28	SYT17/MET/SLIT1/FEZF2/RELN/KIRREL3/UST/CPNE6/EFNB3/FOXG1/TMEM108/DBN1/TRPV2/RASAL1/SEMA3A/NYAP2/FSTL4/MYO16/ALCAM/ARHGEF2/NUMBL/DPYSL5/EPHA7/ETV1/SRGAP2/CAMSAP1/FLRT3/KIT	28/279
GO:0051960	GO:BP	GO:0051960	regulation of nervous system development	6.86669987853093e-06	18	FEZF2/RELN/LRRTM2/ADGRL2/LRTM2/SOX11/EFNB3/FOXG1/DBN1/TRPV2/FSTL4/NUMBL/DPYSL5/LRRN3/EPHA7/NR1D1/XRCC5/FLRT3	18/279
GO:0032879	GO:BP	GO:0032879	regulation of localization	7.2978232295578e-06	45	KCNG1/PRKCG/PIK3R1/EPHA3/KCNH3/RELN/TGFB3/CD47/ADRA2A/NKAIN1/LRRTM2/CNIH3/GRM5/SHISA6/CDK1/PTPN3/RAB3C/KCNAB1/SOX11/KCNA4/GIT1/DBN1/TRPV2/NDFIP2/KCNIP1/RYR2/FXYD1/GPD1L/MARK4/KCNF1/ACTN2/NKAIN2/CDH2/PTPN23/CLN3/NR1D1/CAMK1D/IGF1/GSK3A/CACNA1I/C2CD2L/TRIM8/GPR27/DOC2A/BAG4	45/279
GO:0099537	GO:BP	GO:0099537	trans-synaptic signaling	7.51734215242339e-06	22	PRKCG/EGR3/RELN/ADRA2A/CDH8/LRRTM2/GRM5/SHISA6/EFNB3/TMEM108/GIT1/DBN1/SEZ6/GRIK2/PNOC/CDKL5/USP46/PTPRA/EPHA7/CLN3/KCTD13/DOC2A	22/279
GO:0050807	GO:BP	GO:0050807	regulation of synapse organization	9.12213416814989e-06	14	RELN/CDH8/LRRTM2/ADGRL2/LRTM2/DBN1/C1QL3/C1QL1/CDKL5/CDH2/LRRN3/EPHA7/CLN3/FLRT3	14/279
GO:0050803	GO:BP	GO:0050803	regulation of synapse structure or activity	9.98947332819902e-06	14	RELN/CDH8/LRRTM2/ADGRL2/LRTM2/DBN1/C1QL3/C1QL1/CDKL5/CDH2/LRRN3/EPHA7/CLN3/FLRT3	14/279
GO:0048870	GO:BP	GO:0048870	cell motility	1.47629638464315e-05	40	PTK7/MET/OVOL2/EGR3/STARD13/SLIT1/SNAI2/WWC1/PIK3R1/STAT5A/FEZF2/LDB2/RELN/KIRREL3/ADRA2A/GADD45A/FOXG1/EFNB2/CATSPER2/TAMALIN/NAV3/ZMIZ1/CDH2/PPP1R9B/SPINT2/PTPN23/CLN3/KCTD13/CAMK1D/IGF1/GSK3A/SRGAP2/SPNS2/VAV2/FLRT3/SATB2/DOCK4/UBE2I/BAG4/KIT	40/279
GO:0099536	GO:BP	GO:0099536	synaptic signaling	1.53347926903585e-05	22	PRKCG/EGR3/RELN/ADRA2A/CDH8/LRRTM2/GRM5/SHISA6/EFNB3/TMEM108/GIT1/DBN1/SEZ6/GRIK2/PNOC/CDKL5/USP46/PTPRA/EPHA7/CLN3/KCTD13/DOC2A	22/279
GO:0042127	GO:BP	GO:0042127	regulation of cell population proliferation	2.53806909125048e-05	44	PTK7/OVOL2/EGR3/SNAI2/PIK3R1/EPHA3/IFT57/STAT5A/FEZF2/RARB/RELN/C1QL4/UST/TGFB3/CCKBR/SOX11/EFNB3/FOXG1/NELL1/DBN1/RARA/TRPV2/EFNB2/SEMA3A/SEZ6/GRK5/TAMALIN/MARK4/FSTL4/MTA3/CDKL5/ZMIZ1/DPYSL5/CDH2/SULF2/EPHA7/CLN3/NR1D1/FGF17/CAMK1D/IGF1/COPS8/XRCC5/KIT	44/279
GO:0007416	GO:BP	GO:0007416	synapse assembly	3.08847131512721e-05	12	KIRREL3/SPTBN2/LRRTM2/ADGRL2/LRTM2/C1QL3/GABRA2/CDH2/LRRN3/EPHA7/SRGAP2/FLRT3	12/279
GO:0048588	GO:BP	GO:0048588	developmental cell growth	6.89568222240313e-05	12	SYT17/SLIT1/CPNE6/TMEM108/TRPV2/RASAL1/SEMA3A/FSTL4/EPHA7/IGF1/GSK3A/FLRT3	12/279
GO:0010646	GO:BP	GO:0010646	regulation of cell communication	7.87040747073289e-05	60	PRKCG/PTK7/MET/OVOL2/VWC2L/DHRS3/SNAI2/WWC1/PIK3R1/RELN/C1QL4/ADRA2A/DYRK2/LRRTM2/CREB3L1/GADD45A/CNIH3/GRM5/SHISA6/RSPO3/SOX11/EFNB3/TMEM108/GIT1/DBN1/TERF2IP/RASAL1/PSD3/RYR2/RNF185/SEZ6/GPD1L/GRIK2/MARK4/FSTL4/DACT1/CDKL5/SEMA6A/ZMIZ1/USP46/CDH2/PTPRA/PPP1R9B/GADD45G/SULF2/DOK5/PTPN23/EPHA7/CLN3/NR1D1/AMER2/KCTD13/IGF1/GSK3A/C2CD2L/TRIM8/UBE2I/GPR27/BAG4/KIT	60/279
GO:0042391	GO:BP	GO:0042391	regulation of membrane potential	8.80839389608981e-05	17	GABRA5/GPR88/RELN/RIMS4/GRM5/PTPN3/TMEM108/KCNA4/RYR2/SEZ6/FXYD1/GPD1L/GRIK2/ACTN2/GABRA2/CLN3/CACNA1I	17/279
GO:0051239	GO:BP	GO:0051239	regulation of multicellular organismal process	9.63424627619621e-05	54	MET/OVOL2/EGR3/STARD13/DHRS3/SNAI2/WWC1/PIK3R1/STAT5A/FEZF2/RARB/RELN/TGFB3/ADRA2A/LRRTM2/CREB3L1/GADD45A/SHISA6/ADGRL2/LRTM2/PDE9A/SOX11/EFNB3/FOXG1/FCHO1/TMEM108/GIT1/NELL1/TMEM178A/DBN1/RARA/TRPV2/RYR2/GPD1L/CTSK/FSTL4/ARHGEF2/NAV3/NUMBL/SEMA6A/ZMIZ1/DPYSL5/LRRN3/SULF2/PTPN23/EPHA7/NR1D1/IGF1/GSK3A/XRCC5/FLRT3/DOCK4/EFNA3/KIT	54/279
GO:2000026	GO:BP	GO:2000026	regulation of multicellular organismal development	0.000121545	33	OVOL2/EGR3/SNAI2/PIK3R1/FEZF2/RARB/RELN/LRRTM2/CREB3L1/ADGRL2/LRTM2/SOX11/EFNB3/FOXG1/NELL1/TMEM178A/DBN1/RARA/TRPV2/CTSK/FSTL4/NUMBL/SEMA6A/ZMIZ1/DPYSL5/LRRN3/EPHA7/NR1D1/IGF1/GSK3A/XRCC5/FLRT3/EFNA3	33/279
GO:0048013	GO:BP	GO:0048013	ephrin receptor signaling pathway	0.000122231	7	EPHA5/EPHA3/EFNB3/GIT1/EFNB2/EPHA7/EFNA3	7/279
GO:0007169	GO:BP	GO:0007169	transmembrane receptor protein tyrosine kinase signaling pathway	0.000125882	21	EPHA5/MET/PIK3R1/EPHA3/CREB3L1/EFNB3/TMEM108/GIT1/EFNB2/FSTL4/SEMA6A/PTPRA/SULF2/DOK5/EPHA7/FGF17/IGF1/GSK3A/FLRT3/EFNA3/KIT	21/279
GO:0050804	GO:BP	GO:0050804	modulation of chemical synaptic transmission	0.000129762	17	PRKCG/RELN/ADRA2A/LRRTM2/GRM5/SHISA6/EFNB3/TMEM108/GIT1/DBN1/GRIK2/CDKL5/USP46/PTPRA/EPHA7/CLN3/KCTD13	17/279
GO:0006357	GO:BP	GO:0006357	regulation of transcription by RNA polymerase II	0.000133444	44	NEUROD6/MET/OVOL2/EGR3/SATB1/SNAI2/WWC1/PIK3R1/BARX2/EPOP/FEZF2/LDB2/RARB/RORB/BCL11A/CREB3L1/CRYM/GADD45A/CDK1/GLYR1/BHLHA15/FOXO6/SOX11/FOXG1/ARNT2/BACH2/MESP1/RARA/ETV6/TOX3/CXXC5/TAMALIN/ZMIZ2/ARHGEF2/DACT1/ZMIZ1/NR1D1/IGF1/GSK3A/ETV1/NPAS2/SATB2/UBE2I/DRAP1	44/279
GO:0099177	GO:BP	GO:0099177	regulation of trans-synaptic signaling	0.000137003	17	PRKCG/RELN/ADRA2A/LRRTM2/GRM5/SHISA6/EFNB3/TMEM108/GIT1/DBN1/GRIK2/CDKL5/USP46/PTPRA/EPHA7/CLN3/KCTD13	17/279
GO:0051130	GO:BP	GO:0051130	positive regulation of cellular component organization	0.000147574	29	PTK7/MET/PIK3R1/EPHA3/RELN/TGFB3/CD47/LRRTM2/CDK1/ADGRL2/LRTM2/GIT1/DBN1/TRPV2/MARK4/SLX1A/ACTN2/NAV3/LRRN3/PTPN23/TOM1/CLN3/CAMK1D/IGF1/GSK3A/XRCC5/FLRT3/DOC2A/BAG4	29/279
GO:0021537	GO:BP	GO:0021537	telencephalon development	0.000171993	14	NEUROD6/FOXP2/SLIT1/FEZF2/RARB/RELN/KIRREL3/FOXG1/TMEM108/SEMA3A/NUMBL/ZMIZ1/CDH2/SRGAP2	14/279
GO:0023051	GO:BP	GO:0023051	regulation of signaling	0.000189349	59	PRKCG/PTK7/MET/OVOL2/VWC2L/DHRS3/SNAI2/WWC1/PIK3R1/RELN/C1QL4/ADRA2A/DYRK2/LRRTM2/CREB3L1/GADD45A/CNIH3/GRM5/SHISA6/RSPO3/SOX11/EFNB3/TMEM108/GIT1/DBN1/TERF2IP/RASAL1/PSD3/RNF185/SEZ6/GPD1L/GRIK2/MARK4/FSTL4/DACT1/CDKL5/SEMA6A/ZMIZ1/USP46/CDH2/PTPRA/PPP1R9B/GADD45G/SULF2/DOK5/PTPN23/EPHA7/CLN3/NR1D1/AMER2/KCTD13/IGF1/GSK3A/C2CD2L/TRIM8/UBE2I/GPR27/BAG4/KIT	59/279
GO:0006366	GO:BP	GO:0006366	transcription by RNA polymerase II	0.000191142	45	NEUROD6/MET/OVOL2/EGR3/SATB1/SNAI2/WWC1/PIK3R1/BARX2/EPOP/FEZF2/LDB2/RARB/RORB/BCL11A/CREB3L1/CRYM/GADD45A/CDK1/GLYR1/BHLHA15/FOXO6/SOX11/FOXG1/ARNT2/BACH2/MESP1/RARA/RECQL5/ETV6/TOX3/CXXC5/TAMALIN/ZMIZ2/ARHGEF2/DACT1/ZMIZ1/NR1D1/IGF1/GSK3A/ETV1/NPAS2/SATB2/UBE2I/DRAP1	45/279
GO:0120035	GO:BP	GO:0120035	regulation of plasma membrane bounded cell projection organization	0.000357927	19	PTK7/PIK3R1/EPHA3/FEZF2/RELN/UST/EFNB3/DBN1/TRPV2/EFNB2/SEMA3A/SEZ6/MARK4/FSTL4/CDKL5/DPYSL5/EPHA7/CLN3/CAMK1D	19/279
GO:0010975	GO:BP	GO:0010975	regulation of neuron projection development	0.000378468	15	PTK7/EPHA3/FEZF2/RELN/UST/EFNB3/DBN1/TRPV2/EFNB2/SEMA3A/SEZ6/FSTL4/DPYSL5/EPHA7/CAMK1D	15/279
GO:0034329	GO:BP	GO:0034329	cell junction assembly	0.00038607	16	SNAI2/EPHA3/KIRREL3/SPTBN2/LRRTM2/ADGRL2/LRTM2/C1QL3/ACTN2/GABRA2/CDH2/PTPRA/LRRN3/EPHA7/SRGAP2/FLRT3	16/279
GO:0098609	GO:BP	GO:0098609	cell-cell adhesion	0.00039372	24	EGR3/UNC5D/PCDH20/KIRREL3/CD47/CDH8/NECTIN1/EFNB3/FCHO1/RARA/PCDH19/PCDH9/ALCAM/ZMIZ1/MAGI1/CDH2/SPINT2/ARVCF/PTPN23/EPHA7/IGF1/FLRT3/LOC100398424/KIT	24/279
GO:0031344	GO:BP	GO:0031344	regulation of cell projection organization	0.000425308	19	PTK7/PIK3R1/EPHA3/FEZF2/RELN/UST/EFNB3/DBN1/TRPV2/EFNB2/SEMA3A/SEZ6/MARK4/FSTL4/CDKL5/DPYSL5/EPHA7/CLN3/CAMK1D	19/279
GO:0007166	GO:BP	GO:0007166	cell surface receptor signaling pathway	0.000470661	51	EPHA5/PTK7/MET/OVOL2/VWC2L/SNAI2/PIK3R1/EPHA3/UNC5D/IFT57/STAT5A/RELN/TGFB3/DYRK2/RFTN1/CREB3L1/GADD45A/GRM5/SHISA6/ADGRL2/RSPO3/SOX11/EFNB3/FCHO1/TMEM108/ADGRL3/GIT1/EFNB2/RNF185/SEZ6/GRIK2/FSTL4/DACT1/NUMBL/SEMA6A/ZMIZ1/CDH2/PTPRA/SULF2/DOK5/EPHA7/CLN3/NR1D1/AMER2/FGF17/IGF1/GSK3A/PLXNA1/FLRT3/EFNA3/KIT	51/279
GO:0016310	GO:BP	GO:0016310	phosphorylation	0.000537951	42	PRKCG/EPHA5/PTK7/MET/PRPS2/PIK3R1/EPHA3/LDB2/RELN/ADRA2A/DYRK2/GADD45A/GRM5/CDK1/LOC100393688/NELL1/PPIP5K1/RARA/TERF2IP/GRK5/GPD1L/PIK3C2B/MARK4/ARHGEF2/CDKL5/MAGI1/KHK/PTPRA/PPP1R9B/EPHA7/CLN3/CAMK1D/ANAPC5/SPEG/IGF1/GSK3A/COPS8/VAV2/XRCC5/PLXNA1/BAG4/KIT	42/279
GO:0051093	GO:BP	GO:0051093	negative regulation of developmental process	0.000551135	25	OVOL2/SNAI2/WWC1/PIK3R1/FEZF2/RARB/RORB/C1QL4/CREB3L1/BHLHA15/SOX11/EFNB3/FOXG1/TMEM178A/RARA/CTSK/FSTL4/SEMA6A/DPYSL5/EPHA7/NR1D1/IGF1/GSK3A/EFNA3/KIT	25/279
GO:0060322	GO:BP	GO:0060322	head development	0.000562828	22	NEUROD6/FOXP2/SLIT1/FEZF2/RARB/RELN/KIRREL3/TGFB3/SPTBN2/FOXG1/TMEM108/ARNT2/GIT1/RARA/SEMA3A/SEZ6/NUMBL/ZMIZ1/CDH2/EPHA7/SRGAP2/FLRT3	22/279
GO:0007167	GO:BP	GO:0007167	enzyme-linked receptor protein signaling pathway	0.000687418	26	EPHA5/MET/OVOL2/VWC2L/PIK3R1/EPHA3/TGFB3/CREB3L1/SOX11/EFNB3/TMEM108/GIT1/EFNB2/FSTL4/SEMA6A/ZMIZ1/PTPRA/SULF2/DOK5/EPHA7/FGF17/IGF1/GSK3A/FLRT3/EFNA3/KIT	26/279
GO:0098742	GO:BP	GO:0098742	cell-cell adhesion via plasma-membrane adhesion molecules	0.00073898	12	UNC5D/PCDH20/KIRREL3/CDH8/NECTIN1/PCDH19/PCDH9/ALCAM/CDH2/PTPN23/FLRT3/LOC100398424	12/279
GO:0006355	GO:BP	GO:0006355	regulation of DNA-templated transcription	0.00152674	60	NEUROD6/TSHZ3/FOXP2/MET/OVOL2/EGR3/SATB1/SNAI2/WWC1/PIK3R1/BARX2/EPOP/STAT5A/FEZF2/LDB2/RARB/RORB/RELN/BCL11A/TGFB3/CREB3L1/CRYM/GADD45A/CDK1/PRR7/GLYR1/BHLHA15/FOXO6/SOX11/FOXG1/ARNT2/BACH2/MESP1/RARA/RECQL5/TERF2IP/ETV6/TOX3/SIN3B/CXXC5/TAMALIN/ZMIZ2/ARHGEF2/ACTN2/DACT1/MTA3/ZMIZ1/ATXN1/NR1D1/CAMK1D/IGF1/GSK3A/ETV1/NPAS2/XRCC5/SATB2/TRIM8/UBE2I/DRAP1/KIT	60/279
GO:0051962	GO:BP	GO:0051962	positive regulation of nervous system development	0.00173642	12	RELN/LRRTM2/ADGRL2/LRTM2/SOX11/FOXG1/DBN1/TRPV2/NUMBL/LRRN3/XRCC5/FLRT3	12/279
GO:2001141	GO:BP	GO:2001141	regulation of RNA biosynthetic process	0.00181756	60	NEUROD6/TSHZ3/FOXP2/MET/OVOL2/EGR3/SATB1/SNAI2/WWC1/PIK3R1/BARX2/EPOP/STAT5A/FEZF2/LDB2/RARB/RORB/RELN/BCL11A/TGFB3/CREB3L1/CRYM/GADD45A/CDK1/PRR7/GLYR1/BHLHA15/FOXO6/SOX11/FOXG1/ARNT2/BACH2/MESP1/RARA/RECQL5/TERF2IP/ETV6/TOX3/SIN3B/CXXC5/TAMALIN/ZMIZ2/ARHGEF2/ACTN2/DACT1/MTA3/ZMIZ1/ATXN1/NR1D1/CAMK1D/IGF1/GSK3A/ETV1/NPAS2/XRCC5/SATB2/TRIM8/UBE2I/DRAP1/KIT	60/279
GO:0080090	GO:BP	GO:0080090	regulation of primary metabolic process	0.00206516	85	NEUROD6/TSHZ3/PRKCG/FOXP2/MET/OVOL2/EGR3/SATB1/SNAI2/WWC1/PIK3R1/BARX2/EPOP/IFT57/STAT5A/FEZF2/LDB2/RARB/RORB/RELN/BCL11A/TIMP2/TGFB3/ADRA2A/DYRK2/CREB3L1/CRYM/GADD45A/GRM5/CDK1/PRR7/PTPN3/GLYR1/BHLHA15/FOXO6/SOX11/FOXG1/ARNT2/BACH2/MESP1/GIT1/NELL1/RARA/PSMC2/RECQL5/TERF2IP/ETV6/NDFIP2/TOX3/RNF185/SIN3B/CXXC5/TAMALIN/GPD1L/PIK3C2B/ZMIZ2/PUF60/SLX1A/LARP1/ARHGEF2/ACTN2/DACT1/MTA3/ZMIZ1/PPP1R9B/AT…	85/279
GO:0099173	GO:BP	GO:0099173	postsynapse organization	0.00248804	10	RELN/SPTBN2/CPNE6/SHISA6/TMEM108/DBN1/C1QL3/CDKL5/CDH2/EPHA7	10/279
GO:0045595	GO:BP	GO:0045595	regulation of cell differentiation	0.0025003	32	OVOL2/EGR3/VWC2L/SNAI2/PIK3R1/FEZF2/RARB/RORB/RELN/C1QL4/TGFB3/BRINP2/BHLHA15/SOX11/EFNB3/FOXG1/NELL1/TMEM178A/DBN1/RARA/TRPV2/FSTL4/ARHGEF2/NUMBL/ZMIZ1/DPYSL5/EPHA7/NR1D1/IGF1/GSK3A/XRCC5/KIT	32/279
GO:0050767	GO:BP	GO:0050767	regulation of neurogenesis	0.00256815	13	FEZF2/RELN/SOX11/EFNB3/FOXG1/DBN1/TRPV2/FSTL4/NUMBL/DPYSL5/EPHA7/NR1D1/XRCC5	13/279
GO:0060560	GO:BP	GO:0060560	developmental growth involved in morphogenesis	0.00263989	11	SYT17/PTK7/SLIT1/CPNE6/TMEM108/TRPV2/RASAL1/SEMA3A/FSTL4/EPHA7/FLRT3	11/279
GO:0048583	GO:BP	GO:0048583	regulation of response to stimulus	0.00302224	62	PRKCG/PTK7/MET/OVOL2/VWC2L/DHRS3/SNAI2/WWC1/PIK3R1/FEZF2/RELN/C1QL4/CD47/ADRA2A/DYRK2/RFTN1/CREB3L1/GADD45A/CNIH3/SHISA6/RSPO3/PDE9A/SOX11/FCHO1/TMEM108/GIT1/RARA/RECQL5/TERF2IP/EFNB2/RASAL1/PSD3/RNF185/SEZ6/GPD1L/PIANP/MARK4/FSTL4/DACT1/SEMA6A/ZMIZ1/CDH2/PPP1R9B/GADD45G/SULF2/DOK5/EPHA7/CLN3/NR1D1/AMER2/KCTD13/CAMK1D/IGF1/GSK3A/SPNS2/NPAS2/XRCC5/TRIM8/UBE2I/GPR27/BAG4/KIT	62/279
GO:0006351	GO:BP	GO:0006351	DNA-templated transcription	0.00317218	61	NEUROD6/TSHZ3/FOXP2/MET/OVOL2/EGR3/SATB1/SNAI2/WWC1/PIK3R1/BARX2/EPOP/STAT5A/FEZF2/LDB2/RARB/RORB/RELN/BCL11A/TGFB3/CREB3L1/CRYM/GADD45A/CDK1/PRR7/GLYR1/BHLHA15/FOXO6/SOX11/FOXG1/ARNT2/BACH2/MESP1/RARA/RECQL5/TERF2IP/ETV6/TOX3/SIN3B/CXXC5/TAMALIN/ZMIZ2/ARHGEF2/ACTN2/DACT1/MTA3/ZMIZ1/UBTF/ATXN1/NR1D1/CAMK1D/IGF1/GSK3A/ETV1/NPAS2/XRCC5/SATB2/TRIM8/UBE2I/DRAP1/KIT	61/279
GO:0048513	GO:BP	GO:0048513	animal organ development	0.0035121	50	NEUROD6/GABRA5/FOXP2/PTK7/MET/OVOL2/SLIT1/DHRS3/SNAI2/BARX2/IFT57/FEZF2/LDB2/RARB/RORB/RELN/KIRREL3/TGFB3/SPTBN2/CCKBR/NECTIN1/RSPO3/BHLHA15/SOX11/FOXG1/TMEM108/ARNT2/MESP1/GIT1/NELL1/RARA/SEMA3A/SEZ6/ACTA1/TAMALIN/CTSK/ACTN2/NUMBL/ZMIZ1/CDH2/SULF2/EPHA7/IGF1/GSK3A/ETV1/SRGAP2/SPNS2/FLRT3/SATB2/KIT	50/279
GO:0051241	GO:BP	GO:0051241	negative regulation of multicellular organismal process	0.00364795	26	OVOL2/STARD13/SNAI2/WWC1/PIK3R1/RARB/TGFB3/CREB3L1/GADD45A/SOX11/EFNB3/GIT1/TMEM178A/RARA/CTSK/FSTL4/NAV3/SEMA6A/DPYSL5/PTPN23/EPHA7/NR1D1/IGF1/GSK3A/DOCK4/EFNA3	26/279
GO:0007156	GO:BP	GO:0007156	homophilic cell adhesion via plasma membrane adhesion molecules	0.00367766	9	PCDH20/KIRREL3/CDH8/NECTIN1/PCDH19/PCDH9/CDH2/PTPN23/LOC100398424	9/279
GO:0044087	GO:BP	GO:0044087	regulation of cellular component biogenesis	0.00386068	25	CCSAP/MET/SNAI2/PIK3R1/EPHA3/LDB2/TGFB3/SPTBN2/LRRTM2/ADGRL2/LRTM2/GIT1/MARK4/SLX1A/DACT1/NAV3/CDKL5/PTPRA/LRRN3/EPHA7/CLN3/CAMSAP1/XRCC5/FLRT3/BAG4	25/279
GO:0045892	GO:BP	GO:0045892	negative regulation of DNA-templated transcription	0.00404441	29	TSHZ3/FOXP2/OVOL2/SATB1/SNAI2/WWC1/BARX2/FEZF2/RARB/BCL11A/CREB3L1/CRYM/GADD45A/SOX11/FOXG1/BACH2/RARA/RECQL5/ETV6/SIN3B/CXXC5/DACT1/MTA3/ATXN1/NR1D1/XRCC5/SATB2/UBE2I/DRAP1	29/279
GO:0065009	GO:BP	GO:0065009	regulation of molecular function	0.00407878	43	MET/EPHA3/IFT57/LDB2/RELN/TIMP2/ADRA2A/GADD45A/CNIH3/GRM5/SHISA6/PRR7/PTPN3/KCNAB1/LOC100393688/RARA/TERF2IP/NDFIP2/RASAL1/RYR2/TAMALIN/FXYD1/GPD1L/ARHGEF2/ACTN2/DACT1/H1F0/PCSK6/EPHA7/CLN3/CAMK1D/IGF1/GSK3A/SRGAP2/COPS8/MTMR9/VAV2/XRCC5/TRIM8/UBE2I/BAG4/EFNA3/KIT	43/279
GO:0032774	GO:BP	GO:0032774	RNA biosynthetic process	0.00429681	61	NEUROD6/TSHZ3/FOXP2/MET/OVOL2/EGR3/SATB1/SNAI2/WWC1/PIK3R1/BARX2/EPOP/STAT5A/FEZF2/LDB2/RARB/RORB/RELN/BCL11A/TGFB3/CREB3L1/CRYM/GADD45A/CDK1/PRR7/GLYR1/BHLHA15/FOXO6/SOX11/FOXG1/ARNT2/BACH2/MESP1/RARA/RECQL5/TERF2IP/ETV6/TOX3/SIN3B/CXXC5/TAMALIN/ZMIZ2/ARHGEF2/ACTN2/DACT1/MTA3/ZMIZ1/UBTF/ATXN1/NR1D1/CAMK1D/IGF1/GSK3A/ETV1/NPAS2/XRCC5/SATB2/TRIM8/UBE2I/DRAP1/KIT	61/279
GO:1902679	GO:BP	GO:1902679	negative regulation of RNA biosynthetic process	0.00443163	29	TSHZ3/FOXP2/OVOL2/SATB1/SNAI2/WWC1/BARX2/FEZF2/RARB/BCL11A/CREB3L1/CRYM/GADD45A/SOX11/FOXG1/BACH2/RARA/RECQL5/ETV6/SIN3B/CXXC5/DACT1/MTA3/ATXN1/NR1D1/XRCC5/SATB2/UBE2I/DRAP1	29/279
GO:0021543	GO:BP	GO:0021543	pallium development	0.00478949	10	NEUROD6/FOXP2/FEZF2/RELN/KIRREL3/FOXG1/TMEM108/ZMIZ1/CDH2/SRGAP2	10/279
GO:0043269	GO:BP	GO:0043269	regulation of monoatomic ion transport	0.00492091	17	KCNG1/KCNH3/RELN/NKAIN1/GRM5/PTPN3/KCNAB1/KCNA4/TRPV2/KCNIP1/RYR2/FXYD1/GPD1L/KCNF1/ACTN2/NKAIN2/CACNA1I	17/279
GO:0071495	GO:BP	GO:0071495	cellular response to endogenous stimulus	0.00527599	30	OVOL2/EGR3/VWC2L/SNAI2/PIK3R1/TGFB3/ADRA2A/CREB3L1/GRM5/SOX11/TMEM108/RARA/RECQL5/RYR2/TAMALIN/LARP1/ARHGEF2/ACTN2/SEMA6A/ZMIZ1/PTPRA/PPP1R9B/SULF2/DOK5/FGF17/IGF1/GSK3A/FLRT3/BAG4/KIT	30/279
GO:0051252	GO:BP	GO:0051252	regulation of RNA metabolic process	0.00528972	62	NEUROD6/TSHZ3/FOXP2/MET/OVOL2/EGR3/SATB1/SNAI2/WWC1/PIK3R1/BARX2/EPOP/STAT5A/FEZF2/LDB2/RARB/RORB/RELN/BCL11A/TGFB3/CREB3L1/CRYM/GADD45A/CDK1/PRR7/GLYR1/BHLHA15/FOXO6/SOX11/FOXG1/ARNT2/BACH2/MESP1/RARA/RECQL5/TERF2IP/ETV6/TOX3/SIN3B/CXXC5/TAMALIN/ZMIZ2/PUF60/LARP1/ARHGEF2/ACTN2/DACT1/MTA3/ZMIZ1/ATXN1/NR1D1/CAMK1D/IGF1/GSK3A/ETV1/NPAS2/XRCC5/SATB2/TRIM8/UBE2I/DRAP1/KIT	62/279
GO:0035556	GO:BP	GO:0035556	intracellular signal transduction	0.00539983	46	MET/OVOL2/SNAI2/WWC1/PIK3R1/RELN/C1QL4/ADRA2A/DYRK2/GADD45A/GRM5/RAPGEF2/BHLHA15/SOX11/GIT1/RAPGEF5/TERF2IP/RASAL1/HACD3/PSD3/RYR2/SEZ6/GPD1L/PIK3C2B/RHOBTB2/LARP1/DACT1/SEMA6A/ZMIZ1/CDH2/RAPGEFL1/PPP1R9B/GADD45G/EPHA7/NR1D1/KCTD13/IGF1/GSK3A/ZNF207/COPS8/VAV2/TRIM8/DOCK4/UBE2I/BAG4/KIT	46/279
GO:0040011	GO:BP	GO:0040011	locomotion	0.00565137	28	MET/EGR3/STARD13/SLIT1/SNAI2/PIK3R1/STAT5A/FEZF2/LDB2/RELN/ADRA2A/GADD45A/EFNB2/TAMALIN/NAV3/SPINT2/PTPN23/EPHA7/CLN3/CAMK1D/IGF1/SRGAP2/SPNS2/FLRT3/DOCK4/UBE2I/BAG4/KIT	28/279
GO:0034762	GO:BP	GO:0034762	regulation of transmembrane transport	0.00620105	17	KCNG1/KCNH3/RELN/CNIH3/GRM5/PTPN3/KCNAB1/KCNA4/KCNIP1/RYR2/FXYD1/GPD1L/KCNF1/ACTN2/IGF1/GSK3A/CACNA1I	17/279
GO:0045596	GO:BP	GO:0045596	negative regulation of cell differentiation	0.00629189	19	OVOL2/SNAI2/PIK3R1/FEZF2/RARB/RORB/C1QL4/BHLHA15/SOX11/EFNB3/FOXG1/TMEM178A/RARA/FSTL4/DPYSL5/EPHA7/NR1D1/IGF1/GSK3A	19/279
GO:0009893	GO:BP	GO:0009893	positive regulation of metabolic process	0.00686938	61	NEUROD6/PRKCG/MET/OVOL2/EGR3/WWC1/PIK3R1/BARX2/IFT57/FEZF2/LDB2/RARB/RORB/RELN/TGFB3/ADRA2A/DYRK2/CREB3L1/GADD45A/GRM5/CDK1/PRR7/GLYR1/BHLHA15/SOX11/ARNT2/MESP1/RARA/TRPV2/PSMC2/ETV6/NDFIP2/TOX3/RNF185/TAMALIN/ZMIZ2/SLX1A/LARP1/ARHGEF2/ACTN2/DACT1/ZMIZ1/SULF2/TOM1/EPHA7/CLN3/NR1D1/CAMK1D/IGF1/GSK3A/ETV1/COPS8/MTMR9/VAV2/NPAS2/XRCC5/SATB2/TRIM8/BAG4/EFNA3/KIT	61/279
GO:0007411	GO:BP	GO:0007411	axon guidance	0.00756343	10	SLIT1/FEZF2/RELN/EFNB3/FOXG1/SEMA3A/ALCAM/EPHA7/ETV1/FLRT3	10/279
GO:0007420	GO:BP	GO:0007420	brain development	0.0076848	19	NEUROD6/FOXP2/SLIT1/FEZF2/RARB/RELN/KIRREL3/SPTBN2/FOXG1/TMEM108/ARNT2/GIT1/SEMA3A/SEZ6/NUMBL/ZMIZ1/CDH2/EPHA7/SRGAP2	19/279
GO:0051094	GO:BP	GO:0051094	positive regulation of developmental process	0.00777418	28	SYT17/OVOL2/EGR3/VWC2L/FEZF2/RELN/TGFB3/LRRTM2/CPNE6/ADGRL2/LRTM2/BRINP2/FOXO6/SOX11/FOXG1/NELL1/DBN1/RARA/TRPV2/RASAL1/ARHGEF2/NUMBL/ZMIZ1/LRRN3/IGF1/XRCC5/FLRT3/KIT	28/279
GO:0051171	GO:BP	GO:0051171	regulation of nitrogen compound metabolic process	0.00784481	81	NEUROD6/TSHZ3/PRKCG/FOXP2/MET/OVOL2/EGR3/SATB1/SNAI2/WWC1/PIK3R1/BARX2/EPOP/IFT57/STAT5A/FEZF2/LDB2/RARB/RORB/RELN/BCL11A/TIMP2/TGFB3/ADRA2A/CREB3L1/CRYM/GADD45A/GRM5/CDK1/PRR7/PTPN3/GLYR1/BHLHA15/FOXO6/SOX11/FOXG1/ARNT2/BACH2/MESP1/NELL1/RARA/PSMC2/RECQL5/TERF2IP/ETV6/NDFIP2/TOX3/RNF185/SIN3B/CXXC5/TAMALIN/GPD1L/PIK3C2B/ZMIZ2/PUF60/SLX1A/LARP1/ARHGEF2/ACTN2/DACT1/MTA3/ZMIZ1/PPP1R9B/ATXN1/EPHA7/C…	81/279
GO:0097485	GO:BP	GO:0097485	neuron projection guidance	0.0081406	10	SLIT1/FEZF2/RELN/EFNB3/FOXG1/SEMA3A/ALCAM/EPHA7/ETV1/FLRT3	10/279
GO:0009719	GO:BP	GO:0009719	response to endogenous stimulus	0.00835479	31	OVOL2/EGR3/VWC2L/SNAI2/PIK3R1/TGFB3/ADRA2A/CREB3L1/GRM5/SOX11/TMEM108/RARA/RECQL5/RYR2/TAMALIN/LARP1/ARHGEF2/ACTN2/SEMA6A/ZMIZ1/PTPRA/PPP1R9B/SULF2/DOK5/NR1D1/FGF17/IGF1/GSK3A/FLRT3/BAG4/KIT	31/279
GO:0007409	GO:BP	GO:0007409	axonogenesis	0.0085017	14	SLIT1/FEZF2/RELN/UST/EFNB3/FOXG1/TRPV2/SEMA3A/FSTL4/ALCAM/NUMBL/EPHA7/ETV1/FLRT3	14/279
GO:0051253	GO:BP	GO:0051253	negative regulation of RNA metabolic process	0.00862408	30	TSHZ3/FOXP2/OVOL2/SATB1/SNAI2/WWC1/BARX2/FEZF2/RARB/BCL11A/CREB3L1/CRYM/GADD45A/SOX11/FOXG1/BACH2/RARA/RECQL5/ETV6/SIN3B/CXXC5/LARP1/DACT1/MTA3/ATXN1/NR1D1/XRCC5/SATB2/UBE2I/DRAP1	30/279
GO:0006796	GO:BP	GO:0006796	phosphate-containing compound metabolic process	0.0103137	51	PRKCG/EPHA5/PTK7/MET/PRPS2/PIK3R1/EPHA3/LDB2/RELN/ADRA2A/DYRK2/GADD45A/GRM5/CDK1/PTPN3/PDE9A/ATIC/LOC100393688/NELL1/CTPS1/PPIP5K1/RARA/TERF2IP/GRK5/GPD1L/PIK3C2B/MARK4/ARHGEF2/CDKL5/MAGI1/KHK/PTPRA/PPP1R9B/DNPH1/PTPN23/EPHA7/CLN3/CAMK1D/ANAPC5/SPEG/IGF1/GSK3A/COPS8/MTMR9/VAV2/XRCC5/PLXNA1/PIGH/BAG4/DCTPP1/KIT	51/279
GO:0048667	GO:BP	GO:0048667	cell morphogenesis involved in neuron differentiation	0.0114698	16	SLIT1/FEZF2/RELN/UST/EFNB3/FOXG1/DBN1/TRPV2/SEMA3A/FSTL4/ALCAM/NUMBL/DPYSL5/EPHA7/ETV1/FLRT3	16/279
GO:0019219	GO:BP	GO:0019219	regulation of nucleobase-containing compound metabolic process	0.01381	64	NEUROD6/TSHZ3/PRKCG/FOXP2/MET/OVOL2/EGR3/SATB1/SNAI2/WWC1/PIK3R1/BARX2/EPOP/STAT5A/FEZF2/LDB2/RARB/RORB/RELN/BCL11A/TGFB3/CREB3L1/CRYM/GADD45A/CDK1/PRR7/GLYR1/BHLHA15/FOXO6/SOX11/FOXG1/ARNT2/BACH2/MESP1/RARA/RECQL5/TERF2IP/ETV6/TOX3/SIN3B/CXXC5/TAMALIN/ZMIZ2/PUF60/SLX1A/LARP1/ARHGEF2/ACTN2/DACT1/MTA3/ZMIZ1/ATXN1/NR1D1/CAMK1D/IGF1/GSK3A/ETV1/NPAS2/XRCC5/SATB2/TRIM8/UBE2I/DRAP1/KIT	64/279
GO:0006793	GO:BP	GO:0006793	phosphorus metabolic process	0.0141974	51	PRKCG/EPHA5/PTK7/MET/PRPS2/PIK3R1/EPHA3/LDB2/RELN/ADRA2A/DYRK2/GADD45A/GRM5/CDK1/PTPN3/PDE9A/ATIC/LOC100393688/NELL1/CTPS1/PPIP5K1/RARA/TERF2IP/GRK5/GPD1L/PIK3C2B/MARK4/ARHGEF2/CDKL5/MAGI1/KHK/PTPRA/PPP1R9B/DNPH1/PTPN23/EPHA7/CLN3/CAMK1D/ANAPC5/SPEG/IGF1/GSK3A/COPS8/MTMR9/VAV2/XRCC5/PLXNA1/PIGH/BAG4/DCTPP1/KIT	51/279
GO:0048589	GO:BP	GO:0048589	developmental growth	0.015727	18	SYT17/PTK7/SLIT1/WWC1/RARB/SPTBN2/CPNE6/TMEM108/RARA/TRPV2/RASAL1/SEMA3A/FSTL4/ZMIZ1/EPHA7/IGF1/GSK3A/FLRT3	18/279
GO:0045934	GO:BP	GO:0045934	negative regulation of nucleobase-containing compound metabolic process	0.0157885	31	TSHZ3/FOXP2/OVOL2/SATB1/SNAI2/WWC1/BARX2/FEZF2/RARB/BCL11A/CREB3L1/CRYM/GADD45A/SOX11/FOXG1/BACH2/RARA/RECQL5/TERF2IP/ETV6/SIN3B/CXXC5/LARP1/DACT1/MTA3/ATXN1/NR1D1/XRCC5/SATB2/UBE2I/DRAP1	31/279
GO:0030900	GO:BP	GO:0030900	forebrain development	0.0173279	14	NEUROD6/FOXP2/SLIT1/FEZF2/RARB/RELN/KIRREL3/FOXG1/TMEM108/SEMA3A/NUMBL/ZMIZ1/CDH2/SRGAP2	14/279
GO:0051173	GO:BP	GO:0051173	positive regulation of nitrogen compound metabolic process	0.0194077	51	NEUROD6/PRKCG/MET/OVOL2/EGR3/WWC1/PIK3R1/BARX2/IFT57/FEZF2/LDB2/RARB/RORB/RELN/TGFB3/ADRA2A/GRM5/PRR7/GLYR1/BHLHA15/SOX11/ARNT2/MESP1/RARA/PSMC2/ETV6/NDFIP2/TOX3/RNF185/TAMALIN/ZMIZ2/SLX1A/LARP1/ARHGEF2/ACTN2/DACT1/ZMIZ1/EPHA7/CLN3/NR1D1/IGF1/GSK3A/ETV1/COPS8/NPAS2/XRCC5/SATB2/TRIM8/BAG4/EFNA3/KIT	51/279
GO:0016358	GO:BP	GO:0016358	dendrite development	0.019927	10	FEZF2/RELN/FOXO6/DBN1/SEZ6/FSTL4/DPYSL5/PPP1R9B/CAMK1D/SRGAP2	10/279
GO:0018130	GO:BP	GO:0018130	heterocycle biosynthetic process	0.0201011	65	NEUROD6/TSHZ3/FOXP2/MET/OVOL2/EGR3/SATB1/PRPS2/SNAI2/WWC1/PIK3R1/BARX2/EPOP/STAT5A/FEZF2/LDB2/RARB/RORB/RELN/BCL11A/TGFB3/PTS/CREB3L1/CRYM/GADD45A/CDK1/PRR7/GLYR1/BHLHA15/FOXO6/SOX11/FOXG1/ARNT2/ATIC/BACH2/MESP1/CTPS1/RARA/RECQL5/TERF2IP/ETV6/TOX3/SIN3B/CXXC5/TAMALIN/ZMIZ2/ARHGEF2/ACTN2/DACT1/MTA3/ZMIZ1/UBTF/ATXN1/NR1D1/CAMK1D/IGF1/GSK3A/ETV1/NPAS2/XRCC5/SATB2/TRIM8/UBE2I/DRAP1/KIT	65/279
GO:0034654	GO:BP	GO:0034654	nucleobase-containing compound biosynthetic process	0.0215272	64	NEUROD6/TSHZ3/FOXP2/MET/OVOL2/EGR3/SATB1/PRPS2/SNAI2/WWC1/PIK3R1/BARX2/EPOP/STAT5A/FEZF2/LDB2/RARB/RORB/RELN/BCL11A/TGFB3/CREB3L1/CRYM/GADD45A/CDK1/PRR7/GLYR1/BHLHA15/FOXO6/SOX11/FOXG1/ARNT2/ATIC/BACH2/MESP1/CTPS1/RARA/RECQL5/TERF2IP/ETV6/TOX3/SIN3B/CXXC5/TAMALIN/ZMIZ2/ARHGEF2/ACTN2/DACT1/MTA3/ZMIZ1/UBTF/ATXN1/NR1D1/CAMK1D/IGF1/GSK3A/ETV1/NPAS2/XRCC5/SATB2/TRIM8/UBE2I/DRAP1/KIT	64/279
GO:0019438	GO:BP	GO:0019438	aromatic compound biosynthetic process	0.0216867	65	NEUROD6/TSHZ3/FOXP2/MET/OVOL2/EGR3/SATB1/PRPS2/SNAI2/WWC1/PIK3R1/BARX2/EPOP/STAT5A/FEZF2/LDB2/RARB/RORB/RELN/BCL11A/TGFB3/PTS/CREB3L1/CRYM/GADD45A/CDK1/PRR7/GLYR1/BHLHA15/FOXO6/SOX11/FOXG1/ARNT2/ATIC/BACH2/MESP1/CTPS1/RARA/RECQL5/TERF2IP/ETV6/TOX3/SIN3B/CXXC5/TAMALIN/ZMIZ2/ARHGEF2/ACTN2/DACT1/MTA3/ZMIZ1/UBTF/ATXN1/NR1D1/CAMK1D/IGF1/GSK3A/ETV1/NPAS2/XRCC5/SATB2/TRIM8/UBE2I/DRAP1/KIT	65/279
GO:0051172	GO:BP	GO:0051172	negative regulation of nitrogen compound metabolic process	0.0219654	40	TSHZ3/PRKCG/FOXP2/OVOL2/SATB1/SNAI2/WWC1/BARX2/FEZF2/RARB/BCL11A/TIMP2/CREB3L1/CRYM/GADD45A/PTPN3/SOX11/FOXG1/BACH2/NELL1/RARA/RECQL5/TERF2IP/ETV6/SIN3B/CXXC5/TAMALIN/GPD1L/PIK3C2B/LARP1/DACT1/MTA3/ATXN1/CLN3/NR1D1/IGF1/XRCC5/SATB2/UBE2I/DRAP1	40/279
GO:0061564	GO:BP	GO:0061564	axon development	0.0223125	14	SLIT1/FEZF2/RELN/UST/EFNB3/FOXG1/TRPV2/SEMA3A/FSTL4/ALCAM/NUMBL/EPHA7/ETV1/FLRT3	14/279
GO:0007417	GO:BP	GO:0007417	central nervous system development	0.0223185	22	NEUROD6/FOXP2/SLIT1/FEZF2/RARB/RELN/KIRREL3/SPTBN2/BRINP2/SOX11/FOXG1/TMEM108/ARNT2/GIT1/SEMA3A/SEZ6/NUMBL/ZMIZ1/CDH2/EPHA7/NR1D1/SRGAP2	22/279
GO:0034765	GO:BP	GO:0034765	regulation of monoatomic ion transmembrane transport	0.0232563	14	KCNG1/KCNH3/RELN/GRM5/PTPN3/KCNAB1/KCNA4/KCNIP1/RYR2/FXYD1/GPD1L/KCNF1/ACTN2/CACNA1I	14/279
GO:0006811	GO:BP	GO:0006811	monoatomic ion transport	0.0257311	29	KCNG1/GABRG1/GABRA5/ANO3/KCNH3/RELN/NKAIN1/GRM5/CACHD1/PTPN3/NECTIN1/KCNAB1/BHLHA15/KCNA4/TRPV2/NDFIP2/ATOX1/SLC6A1/KCNIP1/RYR2/CATSPER2/FXYD1/GPD1L/GRIK2/KCNF1/ACTN2/GABRA2/NKAIN2/CACNA1I	29/279
GO:0000122	GO:BP	GO:0000122	negative regulation of transcription by RNA polymerase II	0.0273582	22	OVOL2/SATB1/SNAI2/WWC1/BARX2/FEZF2/RARB/BCL11A/CREB3L1/CRYM/GADD45A/SOX11/FOXG1/BACH2/RARA/ETV6/CXXC5/DACT1/NR1D1/SATB2/UBE2I/DRAP1	22/279
GO:0033043	GO:BP	GO:0033043	regulation of organelle organization	0.0281831	26	CCSAP/MET/PIK3R1/EPHA3/TGFB3/SPTBN2/CDK1/GIT1/TERF2IP/FBXW5/MARK4/SLX1A/ARHGEF2/ACTN2/NAV3/CDKL5/CDH2/TOM1/CLN3/IGF1/GSK3A/ZNF207/CAMSAP1/XRCC5/DOC2A/BAG4	26/279
GO:0032409	GO:BP	GO:0032409	regulation of transporter activity	0.0417143	10	RELN/CNIH3/GRM5/PTPN3/KCNAB1/NDFIP2/RYR2/FXYD1/GPD1L/ACTN2	10/279
GO:1990138	GO:BP	GO:1990138	neuron projection extension	0.0422603	8	SYT17/SLIT1/CPNE6/TMEM108/TRPV2/RASAL1/SEMA3A/FLRT3	8/279
GO:0060284	GO:BP	GO:0060284	regulation of cell development	0.0431871	19	EGR3/PIK3R1/FEZF2/RELN/SOX11/EFNB3/FOXG1/TMEM178A/DBN1/RARA/TRPV2/FSTL4/NUMBL/ZMIZ1/DPYSL5/EPHA7/NR1D1/IGF1/XRCC5	19/279
GO:0036211	GO:BP	GO:0036211	protein modification process	0.0487402	58	PRKCG/EPHA5/PTK7/MET/PIK3R1/EPHA3/RELN/ADRA2A/DYRK2/ANTKMT/GADD45A/GRM5/CDK1/PTPN3/GLYR1/FKBP10/FBXO32/RARA/LARGE1/MARCHF4/TERF2IP/NDFIP2/SUMO1/RYR2/RNF185/GRK5/GPD1L/FBXW5/PIK3C2B/PARP8/MARK4/ARHGEF2/MTA3/CDKL5/USP46/PTPRA/PPP1R9B/ST6GALNAC6/PTPN23/EPHA7/KLHL13/CLN3/FSD1L/KCTD13/CAMK1D/B3GAT2/ANAPC5/SPEG/IGF1/GSK3A/USP12/COPS8/XRCC5/PIGH/TRIM8/UBE2I/BAG4/KIT	58/279
GO:0005886	GO:CC	GO:0005886	plasma membrane	2.94961152877274e-16	105	KCNG1/TSHZ3/PRKCG/GABRG1/EPHA5/GABRA5/PTK7/MET/ANO3/REM2/VWC2L/LY6E/WWC1/EPHA3/UNC5D/PCDH20/LDB2/RELN/KIRREL3/CD47/ADRA2A/CDH8/SPTBN2/RFTN1/NKAIN1/LRRTM2/LRATD2/RIMS4/CPNE6/GRM5/SHISA6/PRR7/CCKBR/PTPN3/RAB3C/NECTIN1/ADGRL2/NETO2/KCNAB1/SYT13/THSD7A/PDE9A/SOX11/EFNB3/FCHO1/KCNA4/DBN1/RARA/TRPV2/PCDH19/ENOX1/PCDH9/EFNB2/SLC6A1/RASAL1/PSD3/KCNIP1/MDGA2/CATSPER2/GRK5/FXYD1/GPD1L/OLFM3/GRIK2/PIK3C2B/G…	105/304
GO:0016020	GO:CC	GO:0016020	membrane	4.65285439770582e-16	172	CYP26A1/KCNG1/TSHZ3/PRKCG/GABRG1/HS3ST2/SYT17/EPHA5/GABRA5/SLC35F1/PTK7/MET/ANO3/REM2/VWC2L/GPR88/MARCHF1/LY6E/WWC1/PIK3R1/EPHA3/UNC5D/KCNH3/PCDH20/LDB2/STUM/TRHDE/LRRC3B/RELN/KIRREL3/UST/CD47/TMEM151B/ADRA2A/CDH8/SPTBN2/RFTN1/NKAIN1/LRRTM2/CREB3L1/LRATD2/ANTKMT/TP53I11/RIMS4/CNIH3/CPNE6/GRM5/SHISA6/CACHD1/PRR7/CCKBR/CHPF/PTPN3/RAB3C/NECTIN1/ADGRL2/LRTM2/NETO2/KCNAB1/SYT13/THSD7A/LOC100397136/PDE…	172/304
GO:0071944	GO:CC	GO:0071944	cell periphery	8.30159264772093e-16	109	KCNG1/TSHZ3/PRKCG/GABRG1/EPHA5/GABRA5/PTK7/MET/ANO3/REM2/VWC2L/LY6E/WWC1/EPHA3/UNC5D/PCDH20/LDB2/RELN/KIRREL3/TGFB3/CD47/ADRA2A/ADAMTS9/CDH8/SPTBN2/RFTN1/NKAIN1/LRRTM2/LRATD2/RIMS4/MYO5B/CPNE6/GRM5/SHISA6/PRR7/CCKBR/PTPN3/RAB3C/NECTIN1/ADGRL2/NETO2/KCNAB1/SYT13/THSD7A/PDE9A/SOX11/EFNB3/FCHO1/KCNA4/DBN1/RARA/TRPV2/PCDH19/ENOX1/PCDH9/EFNB2/SLC6A1/RASAL1/PSD3/KCNIP1/MDGA2/CATSPER2/GRK5/FXYD1/GPD1L/O…	109/304
GO:0045202	GO:CC	GO:0045202	synapse	1.66955371608214e-10	40	PRKCG/GABRG1/GABRA5/SLC35F1/EGR3/VWC2L/KIRREL3/ADRA2A/CDH8/SPTBN2/LRRTM2/RIMS4/GRM5/SHISA6/RAB3C/NECTIN1/ADGRL2/NETO2/EFNB3/TMEM108/GIT1/DBN1/C1QL3/C1QL1/SEZ6/OLFM3/GRIK2/GABRA2/PNOC/CDKL5/CDH2/PTPRA/EPHA7/CLN3/NR1D1/SRGAP2/SYNPR/FLRT3/DOC2A/SNX27	40/304
GO:0030054	GO:CC	GO:0030054	cell junction	2.13598781911625e-09	49	PRKCG/GABRG1/GABRA5/SLC35F1/PTK7/EGR3/VWC2L/PIK3R1/KIRREL3/ADRA2A/CDH8/SPTBN2/LRRTM2/RIMS4/GRM5/SHISA6/RAB3C/NECTIN1/ADGRL2/NETO2/EFNB3/TMEM108/GIT1/DBN1/C1QL3/C1QL1/AFAP1/SEZ6/OLFM3/GRIK2/PUF60/ARHGEF2/ACTN2/GABRA2/PNOC/CDKL5/MAGI1/CDH2/PTPRA/ARVCF/EPHA7/CLN3/NR1D1/SRGAP2/SYNPR/FLRT3/DOC2A/KIT/SNX27	49/304
GO:0097060	GO:CC	GO:0097060	synaptic membrane	1.65866472359536e-07	17	PRKCG/GABRG1/GABRA5/CDH8/LRRTM2/RIMS4/SHISA6/NECTIN1/ADGRL2/NETO2/EFNB3/DBN1/GRIK2/GABRA2/PTPRA/SRGAP2/FLRT3	17/304
GO:0043005	GO:CC	GO:0043005	neuron projection	3.10434741836542e-06	27	PRKCG/CCSAP/GABRA5/IFT57/RELN/KIRREL3/CDH8/CPNE6/GRM5/TMEM108/KCNA4/GIT1/DBN1/KIAA1549/TRPV2/C1QL1/SEZ6/MARK4/ALCAM/GABRA2/NCAM2/DPYSL5/CLN3/NR1D1/SRGAP2/FLRT3/DOCK4	27/304
GO:0098590	GO:CC	GO:0098590	plasma membrane region	1.47227255394609e-05	30	PRKCG/GABRG1/GABRA5/MET/WWC1/CDH8/SPTBN2/LRRTM2/RIMS4/SHISA6/NECTIN1/ADGRL2/NETO2/EFNB3/FCHO1/DBN1/PSD3/FXYD1/GRIK2/SVOP/ARHGEF2/GABRA2/CDH2/PTPRA/PPP1R9B/CLN3/CA11/C2CD2L/SRGAP2/FLRT3	30/304
GO:0098794	GO:CC	GO:0098794	postsynapse	4.33085241832016e-05	19	PRKCG/GABRG1/GABRA5/SPTBN2/LRRTM2/GRM5/SHISA6/ADGRL2/NETO2/TMEM108/GIT1/DBN1/SEZ6/GRIK2/GABRA2/CDH2/NR1D1/SRGAP2/FLRT3	19/304
GO:0098793	GO:CC	GO:0098793	presynapse	4.39954588262341e-05	16	PRKCG/SLC35F1/KIRREL3/ADRA2A/CDH8/SPTBN2/RAB3C/NECTIN1/EFNB3/GIT1/C1QL1/GABRA2/CDH2/CLN3/SYNPR/DOC2A	16/304
GO:0042995	GO:CC	GO:0042995	cell projection	0.000162412	39	PRKCG/CCSAP/GABRA5/GPR88/WWC1/IFT57/RELN/KIRREL3/CDH8/CPNE6/GRM5/TMEM108/KCNA4/GIT1/DBN1/KIAA1549/TRPV2/C1QL1/PSD3/SEZ6/ENAH/MARK4/ALCAM/ARHGEF2/KCNF1/ACTN2/GABRA2/NCAM2/CDKL5/MAGI1/DPYSL5/CDH2/PPP1R9B/PTPN23/CLN3/NR1D1/SRGAP2/FLRT3/DOCK4	39/304
GO:0120025	GO:CC	GO:0120025	plasma membrane bounded cell projection	0.000416297	37	PRKCG/CCSAP/GABRA5/GPR88/WWC1/IFT57/RELN/KIRREL3/CDH8/CPNE6/GRM5/TMEM108/KCNA4/GIT1/DBN1/KIAA1549/TRPV2/C1QL1/PSD3/SEZ6/MARK4/ALCAM/ARHGEF2/KCNF1/ACTN2/GABRA2/NCAM2/CDKL5/DPYSL5/CDH2/PPP1R9B/PTPN23/CLN3/NR1D1/SRGAP2/FLRT3/DOCK4	37/304
GO:0030424	GO:CC	GO:0030424	axon	0.000498898	15	PRKCG/CCSAP/KIRREL3/CDH8/CPNE6/TMEM108/KCNA4/GIT1/DBN1/TRPV2/C1QL1/ALCAM/GABRA2/NCAM2/FLRT3	15/304
GO:0034702	GO:CC	GO:0034702	monoatomic ion channel complex	0.00066247	14	KCNG1/GABRG1/GABRA5/VWC2L/SHISA6/KCNAB1/KCNA4/KCNIP1/RYR2/CATSPER2/OLFM3/KCNF1/GABRA2/CACNA1I	14/304
GO:0045211	GO:CC	GO:0045211	postsynaptic membrane	0.000963786	11	GABRG1/GABRA5/LRRTM2/SHISA6/ADGRL2/NETO2/DBN1/GRIK2/GABRA2/SRGAP2/FLRT3	11/304
GO:0036477	GO:CC	GO:0036477	somatodendritic compartment	0.00125235	16	PRKCG/GABRA5/IFT57/RELN/KIRREL3/SPTBN2/CPNE6/TMEM108/DBN1/SEZ6/MARK4/ALCAM/GABRA2/DPYSL5/NR1D1/SRGAP2	16/304
GO:0030425	GO:CC	GO:0030425	dendrite	0.00218653	13	PRKCG/GABRA5/IFT57/RELN/KIRREL3/CPNE6/DBN1/SEZ6/MARK4/GABRA2/DPYSL5/NR1D1/SRGAP2	13/304
GO:0097447	GO:CC	GO:0097447	dendritic tree	0.00229771	13	PRKCG/GABRA5/IFT57/RELN/KIRREL3/CPNE6/DBN1/SEZ6/MARK4/GABRA2/DPYSL5/NR1D1/SRGAP2	13/304
GO:0098984	GO:CC	GO:0098984	neuron to neuron synapse	0.00382825	11	PRKCG/SHISA6/NECTIN1/NETO2/EFNB3/TMEM108/DBN1/C1QL3/C1QL1/CDH2/SRGAP2	11/304
GO:0098978	GO:CC	GO:0098978	glutamatergic synapse	0.0124849	13	CDH8/SPTBN2/SHISA6/ADGRL2/NETO2/EFNB3/DBN1/C1QL3/C1QL1/CDKL5/EPHA7/FLRT3/SNX27	13/304
GO:1902495	GO:CC	GO:1902495	transmembrane transporter complex	0.0143938	14	KCNG1/GABRG1/GABRA5/VWC2L/SHISA6/KCNAB1/KCNA4/KCNIP1/RYR2/CATSPER2/OLFM3/KCNF1/GABRA2/CACNA1I	14/304
GO:0015629	GO:CC	GO:0015629	actin cytoskeleton	0.0195496	15	BARX2/EPHA3/SPTBN2/MYO5B/DBN1/RARA/ARPC1A/AFAP1/ACTA1/MYO16/ACTN2/CDH2/H1F0/PPP1R9B/TPM3	15/304
GO:1990351	GO:CC	GO:1990351	transporter complex	0.0260743	14	KCNG1/GABRG1/GABRA5/VWC2L/SHISA6/KCNAB1/KCNA4/KCNIP1/RYR2/CATSPER2/OLFM3/KCNF1/GABRA2/CACNA1I	14/304
GO:0005515	GO:MF	GO:0005515	protein binding	1.79428085384294e-09	173	NEUROD6/KCNG1/EPHA5/CCSAP/FOXP2/MET/ANO3/VWC2L/STARD13/KHDRBS3/SLIT1/WWC1/PIK3R1/EPHA3/UNC5D/STAT5A/LDB2/LRRC3B/RELN/C1QL4/TIMP2/TGFB3/PTS/ADRA2A/CDH8/SPTBN2/NKAIN1/LRRTM2/CREB3L1/CRYM/RIMS4/NEUROG2/PPP1R3A/GADD45A/CORT/MYO5B/GRM5/SHISA6/C5H17orf58/CDK1/PRR7/CCKBR/PTPN3/RAB3C/NECTIN1/LRTM2/RSPO3/FSTL5/RAPGEF2/NETO2/GLYR1/KCNAB1/BHLHA15/EFNB3/ARNT2/BACH2/KCNA4/KIF16B/FBXO32/MESP1/GIT1/NELL1/CTPS1/…	173/299
GO:0043565	GO:MF	GO:0043565	sequence-specific DNA binding	0.0122452	34	NEUROD6/FOXP2/OVOL2/EGR3/SATB1/SNAI2/BARX2/FEZF2/RARB/RORB/BCL11A/CREB3L1/NEUROG2/BHLHA15/FOXO6/SOX11/FOXG1/ARNT2/BACH2/MESP1/RARA/TERF2IP/ETV6/CXXC5/TAMALIN/MTA3/UBTF/NR1D1/ETV1/FBXL19/NPAS2/XRCC5/DPF1/SATB2	34/299
GO:0140110	GO:MF	GO:0140110	transcription regulator activity	0.034566	35	NEUROD6/FOXP2/OVOL2/EGR3/SATB1/SNAI2/WWC1/BARX2/STAT5A/FEZF2/RARB/RORB/BCL11A/CREB3L1/CRYM/BHLHA15/FOXO6/SOX11/FOXG1/ARNT2/BACH2/MESP1/RARA/ETV6/TOX3/SIN3B/TAMALIN/ZMIZ2/ACTN2/ZMIZ1/NR1D1/ETV1/NPAS2/SATB2/TRIM8	35/299
HP:0034980	HP	HP:0034980	Synkinesis	0.0339737	6	LARGE1/SEMA3A/DNAL4/CDH2/FGF17/FLRT3	6/91
HP:0001335	HP	HP:0001335	Bimanual synkinesia	0.0339737	6	LARGE1/SEMA3A/DNAL4/CDH2/FGF17/FLRT3	6/91
KEGG:04360	KEGG	KEGG:04360	Axon guidance	0.000301855	13	EPHA5/PIK3R1/EPHA3/UNC5D/EFNB3/EFNB2/ENAH/ROBO2/SEMA6A/DPYSL5/EPHA7/SRGAP2/EFNA3	13/104
KEGG:04015	KEGG	KEGG:04015	Rap1 signaling pathway	0.0251772	11	PRKCG/PIK3R1/RAPGEF2/RAPGEF5/ENAH/MAGI1/FGF17/IGF1/VAV2/EFNA3/KIT	11/104

## Sheet: V2_P16L4_vs_V1_P16L4b
	Category	ID	Description	p.adjust	Count	geneID	GeneRatio
GO:0007399	GO:BP	GO:0007399	nervous system development	5.22272733127258e-21	66	SYT17/NEUROD6/PTK7/GABRA5/PRKCG/FOXP2/ALCAM/KIRREL3/RARB/VWC2L/EGR3/ETV6/OVOL2/IFT57/PPFIA2/CPNE6/C1QL3/ADGRL2/FEZF2/SLIT1/SEZ6/EPHA3/SEMA3A/EPOP/BRINP2/FOXO6/LRTM2/LRRTM3/LRRTM2/EPHA7/TMEM108/ZMIZ1/GABRA2/DPYSL5/PCSK2/NEUROD2/RELN/ADGRB1/VXN/CAMK1D/B3GNT2/GIT1/EFNB2/C1QL1/DACT1/EIF2B1/MYO16/RASAL1/SMARCD3/GRM7/SPTBN2/ARNT2/SOX11/RARA/EFNB3/THRB/COBL/PHACTR1/ARHGEF2/LRRC4/NYAP2/XRCC5/ETV1/SULF2/C…	66/237
GO:0048731	GO:BP	GO:0048731	system development	1.38600563960661e-18	83	SYT17/NEUROD6/PLK2/PTK7/GABRA5/PRKCG/FOXP2/SNAI2/STARD13/ALCAM/KIRREL3/BARX2/RARB/RSPO3/VWC2L/EGR3/ETV6/OVOL2/CCKBR/CREB3L1/IFT57/DHRS3/PPFIA2/CPNE6/C1QL3/ADGRL2/FEZF2/SLIT1/SEZ6/EPHA3/SEMA3A/EPOP/BRINP2/FOXO6/IGF1/LRTM2/LRRTM3/LRRTM2/EPHA7/TMEM108/ZMIZ1/GABRA2/DPYSL5/PCSK2/NEUROD2/RELN/ADGRB1/VXN/CAMK1D/B3GNT2/TGFB3/GIT1/KIT/NECTIN1/EFNB2/C1QL1/DACT1/EIF2B1/TAMALIN/MYO16/RASAL1/SMARCD3/SCG2/CRLF…	83/237
GO:0065007	GO:BP	GO:0065007	biological regulation	4.54323652927595e-17	169	CYP26A1/KCNG1/SYT17/NEUROD6/GABRG1/PLK2/PTK7/GABRA5/TSHZ3/PRKCG/FOXP2/ANO3/KCNH3/TIMP2/PIK3R1/SNAI2/GPR88/STARD13/RFTN1/CORT/SATB1/BCL11A/BARX2/RARB/RSPO3/VWC2L/EGR3/PSD3/ETV6/LDB2/OVOL2/CCKBR/C1QL4/CREB3L1/MET/IFT57/DHRS3/PPFIA2/CACNG3/CPNE6/C1QL3/PLXNA1/UNC5D/ADGRL2/FEZF2/CRYM/SMARCA2/SEZ6/EPHA3/SEMA3A/ADRA2A/SHISA9/EPOP/CDK1/BRINP2/FOXO6/IGF1/MAGI1/LRTM2/STAT5A/WWC1/LRRTM3/LRRTM2/PCSK6/EPHA7/T…	169/237
GO:0007275	GO:BP	GO:0007275	multicellular organism development	6.66135765096665e-17	89	SYT17/NEUROD6/PLK2/PTK7/GABRA5/PRKCG/FOXP2/PIK3R1/SNAI2/STARD13/ALCAM/KIRREL3/BARX2/RARB/RSPO3/VWC2L/EGR3/ETV6/OVOL2/CCKBR/CREB3L1/MET/IFT57/DHRS3/PPFIA2/CPNE6/C1QL3/ADGRL2/FEZF2/SLIT1/SEZ6/EPHA3/SEMA3A/EPOP/BRINP2/FOXO6/IGF1/LRTM2/LRRTM3/LRRTM2/PCSK6/EPHA7/TMEM108/ZMIZ1/GABRA2/DPYSL5/PCSK2/NEUROD2/RELN/ADGRB1/VXN/CAMK1D/B3GNT2/TGFB3/GREM2/GIT1/KIT/NECTIN1/EFNB2/C1QL1/DACT1/EIF2B1/TAMALIN/MYO16/R…	89/237
GO:0032501	GO:BP	GO:0032501	multicellular organismal process	2.48286996164887e-16	116	SYT17/NEUROD6/PLK2/PTK7/GABRA5/PRKCG/FOXP2/PIK3R1/SNAI2/GPR88/STARD13/ALCAM/KIRREL3/BARX2/RARB/RSPO3/VWC2L/EGR3/ETV6/LDB2/OVOL2/CCKBR/CREB3L1/MET/IFT57/DHRS3/PPFIA2/CPNE6/C1QL3/ADGRL2/FEZF2/SLIT1/CRYM/SEZ6/EPHA3/SEMA3A/ADRA2A/SHISA9/EPOP/BRINP2/FOXO6/IGF1/LRTM2/STAT5A/WWC1/LRRTM3/LRRTM2/PCSK6/EPHA7/TMEM108/ZMIZ1/GABRA2/DPYSL5/PCSK2/NEUROD2/RELN/ADGRB1/OTOS/SHISA6/OCA2/GRIK2/VXN/CAMK1D/B3GNT2/TGFB…	116/237
GO:0032502	GO:BP	GO:0032502	developmental process	1.81481543570557e-15	103	SYT17/NEUROD6/PLK2/PTK7/GABRA5/PRKCG/FOXP2/PIK3R1/SNAI2/STARD13/ALCAM/KIRREL3/BARX2/RARB/RSPO3/VWC2L/EGR3/ETV6/LDB2/OVOL2/CCKBR/C1QL4/CREB3L1/MET/IFT57/DHRS3/PPFIA2/CPNE6/C1QL3/ADGRL2/FEZF2/SLIT1/SEZ6/EPHA3/SEMA3A/EPOP/CDK1/BRINP2/FOXO6/IGF1/LRTM2/STAT5A/WWC1/LRRTM3/LRRTM2/PCSK6/EPHA7/TMEM108/ZMIZ1/GABRA2/DPYSL5/PCSK2/NEUROD2/RELN/ADGRB1/SHISA6/OCA2/VXN/CAMK1D/B3GNT2/POSTN/TGFB3/PRR7/SELENOM/GREM…	103/237
GO:0048856	GO:BP	GO:0048856	anatomical structure development	2.25568340744536e-15	99	SYT17/NEUROD6/PLK2/PTK7/GABRA5/PRKCG/FOXP2/PIK3R1/SNAI2/STARD13/ALCAM/KIRREL3/BARX2/RARB/RSPO3/VWC2L/EGR3/ETV6/LDB2/OVOL2/CCKBR/CREB3L1/MET/IFT57/DHRS3/PPFIA2/CPNE6/C1QL3/ADGRL2/FEZF2/SLIT1/SEZ6/EPHA3/SEMA3A/EPOP/CDK1/BRINP2/FOXO6/IGF1/LRTM2/STAT5A/LRRTM3/LRRTM2/PCSK6/EPHA7/TMEM108/ZMIZ1/GABRA2/DPYSL5/PCSK2/NEUROD2/RELN/ADGRB1/OCA2/VXN/CAMK1D/B3GNT2/POSTN/TGFB3/PRR7/SELENOM/GREM2/GIT1/KIT/NECTIN1…	99/237
GO:0050789	GO:BP	GO:0050789	regulation of biological process	5.52073617742418e-15	162	KCNG1/SYT17/NEUROD6/GABRG1/PLK2/PTK7/GABRA5/TSHZ3/PRKCG/FOXP2/KCNH3/TIMP2/PIK3R1/SNAI2/GPR88/STARD13/RFTN1/CORT/SATB1/BCL11A/BARX2/RARB/RSPO3/VWC2L/EGR3/PSD3/ETV6/LDB2/OVOL2/CCKBR/C1QL4/CREB3L1/MET/IFT57/DHRS3/PPFIA2/CACNG3/CPNE6/C1QL3/PLXNA1/UNC5D/ADGRL2/FEZF2/CRYM/SMARCA2/SEZ6/EPHA3/SEMA3A/ADRA2A/SHISA9/EPOP/CDK1/BRINP2/FOXO6/IGF1/MAGI1/LRTM2/STAT5A/WWC1/LRRTM3/LRRTM2/EPHA7/TMEM108/ZMIZ1/GABRA2…	162/237
GO:0050794	GO:BP	GO:0050794	regulation of cellular process	1.98775655789182e-13	154	KCNG1/SYT17/NEUROD6/PLK2/PTK7/TSHZ3/PRKCG/FOXP2/KCNH3/PIK3R1/SNAI2/GPR88/STARD13/RFTN1/CORT/SATB1/BCL11A/BARX2/RARB/RSPO3/VWC2L/EGR3/PSD3/ETV6/LDB2/OVOL2/CCKBR/C1QL4/CREB3L1/MET/IFT57/DHRS3/PPFIA2/CACNG3/CPNE6/C1QL3/PLXNA1/UNC5D/ADGRL2/FEZF2/CRYM/SMARCA2/SEZ6/EPHA3/SEMA3A/ADRA2A/SHISA9/EPOP/CDK1/BRINP2/FOXO6/IGF1/MAGI1/LRTM2/STAT5A/WWC1/LRRTM3/LRRTM2/EPHA7/TMEM108/ZMIZ1/DPYSL5/DYRK2/KCNIP1/NEUROD…	154/237
GO:0022008	GO:BP	GO:0022008	neurogenesis	2.9376306400356e-13	46	SYT17/PTK7/GABRA5/ALCAM/KIRREL3/RARB/VWC2L/ETV6/PPFIA2/CPNE6/FEZF2/SLIT1/SEZ6/EPHA3/SEMA3A/EPOP/BRINP2/FOXO6/EPHA7/TMEM108/ZMIZ1/DPYSL5/NEUROD2/RELN/VXN/CAMK1D/B3GNT2/GIT1/EFNB2/C1QL1/EIF2B1/MYO16/RASAL1/SMARCD3/GRM7/SOX11/EFNB3/THRB/COBL/PHACTR1/ARHGEF2/NYAP2/XRCC5/ETV1/CDH2/NPY	46/237
GO:0007267	GO:BP	GO:0007267	cell-cell signaling	6.11080994938286e-13	44	GABRG1/PLK2/PTK7/GABRA5/PRKCG/SNAI2/RSPO3/EGR3/SEZ6/ADRA2A/SHISA9/LRRTM2/EPHA7/TMEM108/GABRA2/NEUROD2/CDH8/RELN/ADGRB1/ITPKA/SHISA6/GRIK2/LTBP4/SELENOM/GIT1/RYR2/TAC1/DACT1/CPLX2/TMEM132A/GRM7/SOX11/DOC2A/EFNB3/USP46/SNCG/VIP/LRRC4/CDKL5/KCTD13/SULF2/CDH2/CELF4/NPY	44/237
GO:0099536	GO:BP	GO:0099536	synaptic signaling	7.66370221437619e-13	29	PLK2/PRKCG/EGR3/SEZ6/ADRA2A/SHISA9/LRRTM2/EPHA7/TMEM108/NEUROD2/CDH8/RELN/ADGRB1/ITPKA/SHISA6/GRIK2/GIT1/TAC1/CPLX2/GRM7/DOC2A/EFNB3/USP46/SNCG/LRRC4/CDKL5/KCTD13/CELF4/NPY	29/237
GO:0008283	GO:BP	GO:0008283	cell population proliferation	1.58382095621846e-12	66	SYT17/PTK7/PIK3R1/SNAI2/ALCAM/KIRREL3/RARB/EGR3/ETV6/OVOL2/CCKBR/C1QL4/IFT57/PPFIA2/CPNE6/FEZF2/SLIT1/SMARCA2/SEZ6/EPHA3/SEMA3A/FOXO6/IGF1/STAT5A/EPHA7/TMEM108/ZMIZ1/DPYSL5/RELN/DNAJB13/OCA2/CAMK1D/B3GNT2/TGFB3/GFY/KIT/EFNB2/VAV2/TAMALIN/MYO16/RASAL1/SMARCD3/SCG2/CRLF1/GRM7/PID1/SOX11/NELL1/RARA/KCNF1/MTA3/CTPS1/EFNB3/COBL/PHACTR1/ARHGEF2/GRK5/ACTN2/CDKL5/NYAP2/XRCC5/ETV1/SULF2/CDH2/NPY/COPS8	66/237
GO:0098916	GO:BP	GO:0098916	anterograde trans-synaptic signaling	1.63476980873779e-12	28	PLK2/PRKCG/EGR3/SEZ6/ADRA2A/SHISA9/LRRTM2/EPHA7/TMEM108/NEUROD2/CDH8/RELN/ADGRB1/ITPKA/SHISA6/GRIK2/GIT1/TAC1/CPLX2/GRM7/DOC2A/EFNB3/USP46/SNCG/LRRC4/CDKL5/KCTD13/CELF4	28/237
GO:0007268	GO:BP	GO:0007268	chemical synaptic transmission	1.63476980873779e-12	28	PLK2/PRKCG/EGR3/SEZ6/ADRA2A/SHISA9/LRRTM2/EPHA7/TMEM108/NEUROD2/CDH8/RELN/ADGRB1/ITPKA/SHISA6/GRIK2/GIT1/TAC1/CPLX2/GRM7/DOC2A/EFNB3/USP46/SNCG/LRRC4/CDKL5/KCTD13/CELF4	28/237
GO:0099537	GO:BP	GO:0099537	trans-synaptic signaling	2.30088932089205e-12	28	PLK2/PRKCG/EGR3/SEZ6/ADRA2A/SHISA9/LRRTM2/EPHA7/TMEM108/NEUROD2/CDH8/RELN/ADGRB1/ITPKA/SHISA6/GRIK2/GIT1/TAC1/CPLX2/GRM7/DOC2A/EFNB3/USP46/SNCG/LRRC4/CDKL5/KCTD13/CELF4	28/237
GO:0030182	GO:BP	GO:0030182	neuron differentiation	2.73983776428068e-12	40	SYT17/PTK7/GABRA5/ALCAM/KIRREL3/VWC2L/PPFIA2/CPNE6/FEZF2/SLIT1/SEZ6/EPHA3/SEMA3A/EPOP/BRINP2/FOXO6/EPHA7/TMEM108/ZMIZ1/DPYSL5/NEUROD2/RELN/VXN/CAMK1D/B3GNT2/GIT1/EFNB2/C1QL1/MYO16/RASAL1/GRM7/SOX11/EFNB3/THRB/COBL/PHACTR1/ARHGEF2/NYAP2/ETV1/NPY	40/237
GO:0007154	GO:BP	GO:0007154	cell communication	3.60616592291067e-12	103	GABRG1/PLK2/PTK7/GABRA5/PRKCG/PIK3R1/SNAI2/GPR88/STARD13/RFTN1/CORT/RARB/RSPO3/VWC2L/EGR3/PSD3/OVOL2/CCKBR/C1QL4/CREB3L1/MET/IFT57/DHRS3/PLXNA1/UNC5D/ADGRL2/SEZ6/EPHA3/ADRA2A/SHISA9/IGF1/STAT5A/WWC1/LRRTM2/EPHA7/TMEM108/ZMIZ1/GABRA2/DYRK2/NEUROD2/CDH8/RELN/ADGRB1/RAPGEF2/ITPKA/SHISA6/DUSP4/GRIK2/RAPGEF5/LTBP4/POSTN/TGFB3/KCNMB2/GPD1L/SELENOM/GREM2/GIT1/GADD45A/RYR2/KIT/EFNB2/SHC3/TAC1/DACT1/EIF2B…	103/237
GO:0048699	GO:BP	GO:0048699	generation of neurons	4.2135021988656e-12	41	SYT17/PTK7/GABRA5/ALCAM/KIRREL3/VWC2L/PPFIA2/CPNE6/FEZF2/SLIT1/SEZ6/EPHA3/SEMA3A/EPOP/BRINP2/FOXO6/EPHA7/TMEM108/ZMIZ1/DPYSL5/NEUROD2/RELN/VXN/CAMK1D/B3GNT2/GIT1/EFNB2/C1QL1/MYO16/RASAL1/SMARCD3/GRM7/SOX11/EFNB3/THRB/COBL/PHACTR1/ARHGEF2/NYAP2/ETV1/NPY	41/237
GO:0065008	GO:BP	GO:0065008	regulation of biological quality	4.58115640586987e-12	60	CYP26A1/PLK2/GABRA5/PRKCG/ANO3/PIK3R1/GPR88/CCKBR/PPFIA2/CACNG3/C1QL3/ADGRL2/CRYM/SEZ6/SEMA3A/ADRA2A/SHISA9/IGF1/LRTM2/LRRTM3/LRRTM2/PCSK6/EPHA7/TMEM108/GABRA2/PCSK2/NEUROD2/CDH8/RELN/ADGRB1/ITPKA/KCNA4/SHISA6/OCA2/GRIK2/LTBP4/KCNMB2/GPD1L/SELENOM/GIT1/RYR2/KIT/C1QL1/DACT1/VAV2/CPLX2/SPTBN2/PID1/SOX11/DOC2A/THRB/SNCG/VIP/RIMS4/ACTN2/SST/CDKL5/CDH2/CELF4/NPY	60/237
GO:0023052	GO:BP	GO:0023052	signaling	8.45762610890291e-12	101	GABRG1/PLK2/PTK7/GABRA5/PRKCG/PIK3R1/SNAI2/GPR88/STARD13/RFTN1/CORT/RARB/RSPO3/VWC2L/EGR3/PSD3/OVOL2/CCKBR/C1QL4/CREB3L1/MET/IFT57/DHRS3/PLXNA1/UNC5D/ADGRL2/SEZ6/EPHA3/ADRA2A/SHISA9/IGF1/STAT5A/WWC1/LRRTM2/EPHA7/TMEM108/ZMIZ1/GABRA2/DYRK2/NEUROD2/CDH8/RELN/ADGRB1/RAPGEF2/ITPKA/SHISA6/DUSP4/GRIK2/RAPGEF5/LTBP4/POSTN/TGFB3/GPD1L/SELENOM/GREM2/GIT1/GADD45A/RYR2/KIT/EFNB2/SHC3/TAC1/DACT1/EIF2B1/VAV2/…	101/237
GO:0034330	GO:BP	GO:0034330	cell junction organization	4.43011122888694e-11	29	PIK3R1/SNAI2/KIRREL3/PPFIA2/CPNE6/C1QL3/ADGRL2/SEZ6/EPHA3/LRTM2/LRRTM3/LRRTM2/EPHA7/TMEM108/GABRA2/NEUROD2/CDH8/RELN/ADGRB1/SHISA6/TGFB3/NECTIN1/C1QL1/SPTBN2/SNCG/ACTN2/LRRC4/CDKL5/CDH2	29/237
GO:0048666	GO:BP	GO:0048666	neuron development	1.11004612487603e-10	34	SYT17/PTK7/GABRA5/ALCAM/KIRREL3/PPFIA2/CPNE6/FEZF2/SLIT1/SEZ6/EPHA3/SEMA3A/FOXO6/EPHA7/TMEM108/ZMIZ1/DPYSL5/NEUROD2/RELN/CAMK1D/B3GNT2/GIT1/EFNB2/C1QL1/MYO16/RASAL1/GRM7/EFNB3/THRB/COBL/PHACTR1/NYAP2/ETV1/NPY	34/237
GO:0050808	GO:BP	GO:0050808	synapse organization	1.15518168035522e-10	23	KIRREL3/PPFIA2/CPNE6/C1QL3/ADGRL2/SEZ6/LRTM2/LRRTM3/LRRTM2/EPHA7/TMEM108/GABRA2/NEUROD2/CDH8/RELN/ADGRB1/SHISA6/C1QL1/SPTBN2/SNCG/LRRC4/CDKL5/CDH2	23/237
GO:0050804	GO:BP	GO:0050804	modulation of chemical synaptic transmission	3.61257507058487e-10	22	PLK2/PRKCG/ADRA2A/SHISA9/LRRTM2/EPHA7/TMEM108/NEUROD2/RELN/ADGRB1/ITPKA/SHISA6/GRIK2/GIT1/CPLX2/EFNB3/USP46/SNCG/LRRC4/CDKL5/KCTD13/CELF4	22/237
GO:0099177	GO:BP	GO:0099177	regulation of trans-synaptic signaling	3.89940089741722e-10	22	PLK2/PRKCG/ADRA2A/SHISA9/LRRTM2/EPHA7/TMEM108/NEUROD2/RELN/ADGRB1/ITPKA/SHISA6/GRIK2/GIT1/CPLX2/EFNB3/USP46/SNCG/LRRC4/CDKL5/KCTD13/CELF4	22/237
GO:0048468	GO:BP	GO:0048468	cell development	1.27844070963953e-09	55	SYT17/PTK7/GABRA5/PIK3R1/SNAI2/ALCAM/KIRREL3/RARB/EGR3/ETV6/OVOL2/MET/PPFIA2/CPNE6/FEZF2/SLIT1/SEZ6/EPHA3/SEMA3A/FOXO6/IGF1/STAT5A/EPHA7/TMEM108/ZMIZ1/DPYSL5/NEUROD2/RELN/OCA2/CAMK1D/B3GNT2/PRR7/GIT1/KIT/EFNB2/C1QL1/EIF2B1/MYO16/RASAL1/SMARCD3/GRM7/ST3GAL1/SOX11/RARA/EFNB3/THRB/COBL/PHACTR1/ACTN2/NYAP2/XRCC5/ETV1/SULF2/CDH2/NPY	55/237
GO:0048869	GO:BP	GO:0048869	cellular developmental process	2.16256300980515e-09	69	SYT17/NEUROD6/PTK7/GABRA5/PIK3R1/SNAI2/ALCAM/KIRREL3/BARX2/RARB/VWC2L/EGR3/ETV6/OVOL2/C1QL4/MET/PPFIA2/CPNE6/FEZF2/SLIT1/SEZ6/EPHA3/SEMA3A/EPOP/CDK1/BRINP2/FOXO6/IGF1/STAT5A/EPHA7/TMEM108/ZMIZ1/DPYSL5/NEUROD2/RELN/ADGRB1/OCA2/VXN/CAMK1D/B3GNT2/TGFB3/PRR7/GIT1/KIT/EFNB2/C1QL1/EIF2B1/TAMALIN/MYO16/RASAL1/SMARCD3/GRM7/ST3GAL1/SOX11/NELL1/RARA/DNPH1/EFNB3/THRB/COBL/PHACTR1/ARHGEF2/ACTN2/NYAP2/XRCC5/E…	69/237
GO:0030154	GO:BP	GO:0030154	cell differentiation	2.16256300980515e-09	69	SYT17/NEUROD6/PTK7/GABRA5/PIK3R1/SNAI2/ALCAM/KIRREL3/BARX2/RARB/VWC2L/EGR3/ETV6/OVOL2/C1QL4/MET/PPFIA2/CPNE6/FEZF2/SLIT1/SEZ6/EPHA3/SEMA3A/EPOP/CDK1/BRINP2/FOXO6/IGF1/STAT5A/EPHA7/TMEM108/ZMIZ1/DPYSL5/NEUROD2/RELN/ADGRB1/OCA2/VXN/CAMK1D/B3GNT2/TGFB3/PRR7/GIT1/KIT/EFNB2/C1QL1/EIF2B1/TAMALIN/MYO16/RASAL1/SMARCD3/GRM7/ST3GAL1/SOX11/NELL1/RARA/DNPH1/EFNB3/THRB/COBL/PHACTR1/ARHGEF2/ACTN2/NYAP2/XRCC5/E…	69/237
GO:0031175	GO:BP	GO:0031175	neuron projection development	3.63996333931616e-08	28	SYT17/PTK7/ALCAM/KIRREL3/PPFIA2/CPNE6/FEZF2/SLIT1/SEZ6/EPHA3/SEMA3A/FOXO6/EPHA7/TMEM108/DPYSL5/RELN/CAMK1D/B3GNT2/EFNB2/MYO16/RASAL1/GRM7/EFNB3/COBL/PHACTR1/NYAP2/ETV1/NPY	28/237
GO:0120036	GO:BP	GO:0120036	plasma membrane bounded cell projection organization	4.58661542299869e-08	37	SYT17/PTK7/PIK3R1/ALCAM/KIRREL3/IFT57/PPFIA2/CPNE6/FEZF2/SLIT1/SEZ6/EPHA3/SEMA3A/FOXO6/EPHA7/TMEM108/DPYSL5/RELN/DNAJB13/CAMK1D/B3GNT2/GFY/KIT/EFNB2/VAV2/MYO16/RASAL1/GRM7/KCNF1/EFNB3/COBL/PHACTR1/ACTN2/CDKL5/NYAP2/ETV1/NPY	37/237
GO:0030030	GO:BP	GO:0030030	cell projection organization	7.13509110943381e-08	37	SYT17/PTK7/PIK3R1/ALCAM/KIRREL3/IFT57/PPFIA2/CPNE6/FEZF2/SLIT1/SEZ6/EPHA3/SEMA3A/FOXO6/EPHA7/TMEM108/DPYSL5/RELN/DNAJB13/CAMK1D/B3GNT2/GFY/KIT/EFNB2/VAV2/MYO16/RASAL1/GRM7/KCNF1/EFNB3/COBL/PHACTR1/ACTN2/CDKL5/NYAP2/ETV1/NPY	37/237
GO:0050896	GO:BP	GO:0050896	response to stimulus	1.85326069152728e-07	113	CYP26A1/PLK2/PTK7/GABRA5/PRKCG/PIK3R1/SNAI2/GPR88/STARD13/RFTN1/CORT/RARB/RSPO3/VWC2L/EGR3/PSD3/OVOL2/CCKBR/C1QL4/CREB3L1/MET/IFT57/DHRS3/CPNE6/PLXNA1/UNC5D/ADGRL2/FEZF2/SLIT1/SEZ6/EPHA3/ADRA2A/SHISA9/GSTO1/BRINP2/IGF1/STAT5A/WWC1/CHCHD6/EPHA7/TMEM108/ZMIZ1/DYRK2/NEUROD2/CDH8/RELN/ADGRB1/RAPGEF2/ITPKA/SHISA6/DUSP4/GRIK2/RAPGEF5/CAMK1D/B3GNT2/LTBP4/POSTN/TGFB3/APITD1/KCNMB2/GPD1L/SELENOM/GREM2/GIT…	113/237
GO:0051716	GO:BP	GO:0051716	cellular response to stimulus	2.57590203392886e-07	101	CYP26A1/PLK2/PTK7/PRKCG/PIK3R1/SNAI2/GPR88/STARD13/RFTN1/CORT/RARB/RSPO3/VWC2L/EGR3/PSD3/OVOL2/CCKBR/C1QL4/CREB3L1/MET/IFT57/DHRS3/CPNE6/PLXNA1/UNC5D/ADGRL2/SEZ6/EPHA3/ADRA2A/SHISA9/GSTO1/BRINP2/IGF1/STAT5A/WWC1/CHCHD6/EPHA7/TMEM108/ZMIZ1/DYRK2/NEUROD2/RELN/ADGRB1/RAPGEF2/ITPKA/SHISA6/DUSP4/GRIK2/RAPGEF5/CAMK1D/B3GNT2/LTBP4/POSTN/TGFB3/APITD1/GPD1L/GREM2/GIT1/GADD45A/RYR2/KIT/EFNB2/SHC3/TAC1/DACT…	101/237
GO:0009653	GO:BP	GO:0009653	anatomical structure morphogenesis	3.43837397346153e-07	51	SYT17/PLK2/PTK7/STARD13/ALCAM/KIRREL3/BARX2/RARB/RSPO3/EGR3/OVOL2/CREB3L1/MET/IFT57/DHRS3/PPFIA2/CPNE6/FEZF2/SLIT1/SEMA3A/EPHA7/TMEM108/ZMIZ1/DPYSL5/RELN/ADGRB1/B3GNT2/TGFB3/GREM2/KIT/NECTIN1/EFNB2/TAMALIN/MYO16/RASAL1/SMARCD3/SCG2/SPTBN2/PID1/SOX11/RARA/EFNB3/THRB/COBL/PHACTR1/ARHGEF2/ACTN2/NYAP2/ETV1/SULF2/CDH2	51/237
GO:0048518	GO:BP	GO:0048518	positive regulation of biological process	7.33601738280822e-07	88	SYT17/NEUROD6/PLK2/PTK7/PRKCG/PIK3R1/SNAI2/RFTN1/BARX2/RARB/RSPO3/VWC2L/EGR3/ETV6/LDB2/OVOL2/CCKBR/CREB3L1/MET/IFT57/CPNE6/ADGRL2/FEZF2/SMARCA2/EPHA3/ADRA2A/CDK1/BRINP2/FOXO6/IGF1/MAGI1/LRTM2/STAT5A/WWC1/LRRTM3/LRRTM2/EPHA7/TMEM108/ZMIZ1/DYRK2/NEUROD2/RELN/ADGRB1/GRIK2/LARP6/CAMK1D/TGFB3/PRR7/GPD1L/GIT1/GADD45A/RYR2/KIT/EFNB2/DACT1/EIF2B1/VAV2/TAMALIN/RASAL1/SMARCD3/SCG2/CRLF1/TMEM132A/ARNT2/PID1…	88/237
GO:0050807	GO:BP	GO:0050807	regulation of synapse organization	1.06720301240907e-06	14	PPFIA2/C1QL3/ADGRL2/LRTM2/LRRTM3/LRRTM2/EPHA7/NEUROD2/CDH8/RELN/ADGRB1/C1QL1/CDKL5/CDH2	14/237
GO:0050803	GO:BP	GO:0050803	regulation of synapse structure or activity	1.1707923205317e-06	14	PPFIA2/C1QL3/ADGRL2/LRTM2/LRRTM3/LRRTM2/EPHA7/NEUROD2/CDH8/RELN/ADGRB1/C1QL1/CDKL5/CDH2	14/237
GO:0007165	GO:BP	GO:0007165	signal transduction	1.20860272960259e-06	85	PTK7/PIK3R1/SNAI2/GPR88/STARD13/RFTN1/CORT/RARB/RSPO3/VWC2L/PSD3/OVOL2/CCKBR/C1QL4/CREB3L1/MET/IFT57/DHRS3/PLXNA1/UNC5D/ADGRL2/SEZ6/EPHA3/ADRA2A/SHISA9/IGF1/STAT5A/WWC1/EPHA7/TMEM108/ZMIZ1/DYRK2/NEUROD2/RELN/ADGRB1/RAPGEF2/SHISA6/DUSP4/GRIK2/RAPGEF5/LTBP4/POSTN/TGFB3/GPD1L/GREM2/GIT1/GADD45A/RYR2/KIT/EFNB2/SHC3/TAC1/DACT1/EIF2B1/VAV2/TAMALIN/RASAL1/SCG2/CRLF1/TMEM132A/GRM7/ARHGAP20/PID1/FCHO1/SOX…	85/237
GO:0048522	GO:BP	GO:0048522	positive regulation of cellular process	1.30829380366369e-06	82	SYT17/NEUROD6/PLK2/PTK7/PRKCG/PIK3R1/SNAI2/BARX2/RARB/RSPO3/VWC2L/EGR3/ETV6/LDB2/OVOL2/CCKBR/MET/CPNE6/ADGRL2/FEZF2/SMARCA2/EPHA3/ADRA2A/CDK1/BRINP2/IGF1/MAGI1/LRTM2/STAT5A/WWC1/LRRTM3/LRRTM2/EPHA7/TMEM108/ZMIZ1/DYRK2/NEUROD2/RELN/ADGRB1/GRIK2/LARP6/CAMK1D/TGFB3/PRR7/GPD1L/GIT1/GADD45A/RYR2/KIT/EFNB2/DACT1/VAV2/TAMALIN/RASAL1/SMARCD3/SCG2/CRLF1/TMEM132A/ARNT2/PID1/FCHO1/SOX11/NELL1/RARA/DOC2A/MTA…	82/237
GO:0042127	GO:BP	GO:0042127	regulation of cell population proliferation	1.48314577623889e-06	42	PTK7/PIK3R1/SNAI2/RARB/EGR3/OVOL2/CCKBR/C1QL4/IFT57/PPFIA2/FEZF2/SMARCA2/SEZ6/EPHA3/SEMA3A/IGF1/STAT5A/EPHA7/ZMIZ1/DPYSL5/RELN/CAMK1D/TGFB3/KIT/EFNB2/TAMALIN/SMARCD3/SCG2/CRLF1/PID1/SOX11/NELL1/RARA/MTA3/EFNB3/COBL/GRK5/CDKL5/XRCC5/SULF2/CDH2/COPS8	42/237
GO:0010646	GO:BP	GO:0010646	regulation of cell communication	2.32888508382999e-06	57	PLK2/PTK7/PRKCG/PIK3R1/SNAI2/RSPO3/VWC2L/PSD3/OVOL2/C1QL4/CREB3L1/MET/DHRS3/SEZ6/ADRA2A/SHISA9/IGF1/WWC1/LRRTM2/EPHA7/TMEM108/ZMIZ1/DYRK2/NEUROD2/RELN/ADGRB1/ITPKA/SHISA6/DUSP4/GRIK2/POSTN/GPD1L/GREM2/GIT1/GADD45A/RYR2/KIT/DACT1/RASAL1/SCG2/CPLX2/TMEM132A/PID1/SOX11/EFNB3/THRB/USP46/SNCG/LRRC4/CDKL5/KCTD13/RNF185/SULF2/CDH2/CELF4/DOK5/SPRY2	57/237
GO:0032990	GO:BP	GO:0032990	cell part morphogenesis	3.90822125005037e-06	21	SYT17/ALCAM/KIRREL3/PPFIA2/CPNE6/FEZF2/SLIT1/SEMA3A/EPHA7/TMEM108/DPYSL5/RELN/B3GNT2/MYO16/RASAL1/PID1/EFNB3/COBL/PHACTR1/NYAP2/ETV1	21/237
GO:0048812	GO:BP	GO:0048812	neuron projection morphogenesis	4.4333511231765e-06	20	SYT17/ALCAM/KIRREL3/PPFIA2/CPNE6/FEZF2/SLIT1/SEMA3A/EPHA7/TMEM108/DPYSL5/RELN/B3GNT2/MYO16/RASAL1/EFNB3/COBL/PHACTR1/NYAP2/ETV1	20/237
GO:0007416	GO:BP	GO:0007416	synapse assembly	4.79368937663038e-06	12	KIRREL3/C1QL3/ADGRL2/LRTM2/LRRTM3/LRRTM2/EPHA7/GABRA2/ADGRB1/SPTBN2/LRRC4/CDH2	12/237
GO:0048523	GO:BP	GO:0048523	negative regulation of cellular process	5.46260655982159e-06	77	PLK2/TSHZ3/FOXP2/PIK3R1/SNAI2/STARD13/SATB1/BCL11A/BARX2/RARB/VWC2L/EGR3/ETV6/OVOL2/C1QL4/CREB3L1/MET/IFT57/DHRS3/FEZF2/CRYM/SMARCA2/EPHA3/SEMA3A/ADRA2A/CDK1/BRINP2/IGF1/WWC1/LRRTM2/EPHA7/DPYSL5/DYRK2/NEUROD2/LOC100393688/ADGRB1/SHISA6/DUSP4/KCNAB1/CAMK1D/TGFB3/SIN3B/GPD1L/GREM2/GIT1/GADD45A/RYR2/KIT/EFNB2/DACT1/TAMALIN/RASAL1/SCG2/CRLF1/SPTBN2/ST3GAL1/PID1/SOX11/NELL1/RARA/CXXC5/MTA3/ZNF706/EFNB…	77/237
GO:0023051	GO:BP	GO:0023051	regulation of signaling	6.46125098234474e-06	56	PLK2/PTK7/PRKCG/PIK3R1/SNAI2/RSPO3/VWC2L/PSD3/OVOL2/C1QL4/CREB3L1/MET/DHRS3/SEZ6/ADRA2A/SHISA9/IGF1/WWC1/LRRTM2/EPHA7/TMEM108/ZMIZ1/DYRK2/NEUROD2/RELN/ADGRB1/ITPKA/SHISA6/DUSP4/GRIK2/POSTN/GPD1L/GREM2/GIT1/GADD45A/KIT/DACT1/RASAL1/SCG2/CPLX2/TMEM132A/PID1/SOX11/EFNB3/THRB/USP46/SNCG/LRRC4/CDKL5/KCTD13/RNF185/SULF2/CDH2/CELF4/DOK5/SPRY2	56/237
GO:0048519	GO:BP	GO:0048519	negative regulation of biological process	7.87544199082823e-06	80	PLK2/TSHZ3/PRKCG/FOXP2/TIMP2/PIK3R1/SNAI2/STARD13/SATB1/BCL11A/BARX2/RARB/VWC2L/EGR3/ETV6/OVOL2/C1QL4/CREB3L1/MET/IFT57/DHRS3/FEZF2/CRYM/SMARCA2/EPHA3/SEMA3A/ADRA2A/CDK1/BRINP2/IGF1/WWC1/LRRTM2/EPHA7/DPYSL5/DYRK2/NEUROD2/LOC100393688/ADGRB1/SHISA6/DUSP4/KCNAB1/CAMK1D/TGFB3/SIN3B/GPD1L/GREM2/GIT1/GADD45A/RYR2/KIT/EFNB2/DACT1/TAMALIN/RASAL1/SCG2/CRLF1/TMEM132A/SPTBN2/ST3GAL1/PID1/SOX11/NELL1/RARA/C…	80/237
GO:0032989	GO:BP	GO:0032989	cellular component morphogenesis	8.35010759663294e-06	22	SYT17/ALCAM/KIRREL3/PPFIA2/CPNE6/FEZF2/SLIT1/SEMA3A/EPHA7/TMEM108/DPYSL5/RELN/B3GNT2/MYO16/RASAL1/PID1/EFNB3/COBL/PHACTR1/ACTN2/NYAP2/ETV1	22/237
GO:0120039	GO:BP	GO:0120039	plasma membrane bounded cell projection morphogenesis	8.57509382134737e-06	20	SYT17/ALCAM/KIRREL3/PPFIA2/CPNE6/FEZF2/SLIT1/SEMA3A/EPHA7/TMEM108/DPYSL5/RELN/B3GNT2/MYO16/RASAL1/EFNB3/COBL/PHACTR1/NYAP2/ETV1	20/237
GO:0048858	GO:BP	GO:0048858	cell projection morphogenesis	9.39867544461616e-06	20	SYT17/ALCAM/KIRREL3/PPFIA2/CPNE6/FEZF2/SLIT1/SEMA3A/EPHA7/TMEM108/DPYSL5/RELN/B3GNT2/MYO16/RASAL1/EFNB3/COBL/PHACTR1/NYAP2/ETV1	20/237
GO:0007166	GO:BP	GO:0007166	cell surface receptor signaling pathway	1.3973534906715e-05	49	PTK7/PIK3R1/SNAI2/RFTN1/RSPO3/VWC2L/OVOL2/CREB3L1/MET/IFT57/PLXNA1/UNC5D/ADGRL2/SEZ6/EPHA3/IGF1/STAT5A/EPHA7/TMEM108/ZMIZ1/DYRK2/RELN/ADGRB1/SHISA6/GRIK2/LTBP4/POSTN/TGFB3/GREM2/GIT1/GADD45A/KIT/EFNB2/DACT1/EIF2B1/SCG2/CRLF1/TMEM132A/GRM7/PID1/FCHO1/SOX11/EFNB3/ADGRL3/RNF185/SULF2/CDH2/CELF4/DOK5	49/237
GO:0051128	GO:BP	GO:0051128	regulation of cellular component organization	1.8446895436511e-05	44	SYT17/PLK2/PTK7/PRKCG/PIK3R1/SNAI2/MET/PPFIA2/CPNE6/C1QL3/ADGRL2/FEZF2/SMARCA2/SEZ6/EPHA3/SEMA3A/CDK1/IGF1/LRTM2/LRRTM3/LRRTM2/EPHA7/DPYSL5/NEUROD2/CDH8/RELN/ADGRB1/CAMK1D/TGFB3/GIT1/EFNB2/C1QL1/DACT1/RASAL1/CPLX2/SPTBN2/DOC2A/EFNB3/COBL/ARHGEF2/ACTN2/CDKL5/XRCC5/CDH2	44/237
GO:0050793	GO:BP	GO:0050793	regulation of developmental process	2.71753609608439e-05	44	SYT17/PLK2/PTK7/PIK3R1/SNAI2/RARB/VWC2L/EGR3/OVOL2/C1QL4/CREB3L1/PPFIA2/CPNE6/ADGRL2/FEZF2/SEZ6/SEMA3A/BRINP2/FOXO6/IGF1/LRTM2/WWC1/LRRTM3/LRRTM2/EPHA7/ZMIZ1/DPYSL5/NEUROD2/RELN/ADGRB1/CAMK1D/TGFB3/KIT/RASAL1/SMARCD3/SOX11/NELL1/RARA/ZNF706/EFNB3/COBL/ARHGEF2/XRCC5/CELF4	44/237
GO:0099173	GO:BP	GO:0099173	postsynapse organization	5.07942234853063e-05	11	PPFIA2/CPNE6/C1QL3/EPHA7/TMEM108/RELN/SHISA6/SPTBN2/LRRC4/CDKL5/CDH2	11/237
GO:0060322	GO:BP	GO:0060322	head development	0.000142676	21	NEUROD6/FOXP2/KIRREL3/RARB/FEZF2/SLIT1/SEZ6/SEMA3A/EPHA7/TMEM108/ZMIZ1/NEUROD2/RELN/TGFB3/GIT1/SPTBN2/ARNT2/RARA/PHACTR1/CDH2/NPY	21/237
GO:0021537	GO:BP	GO:0021537	telencephalon development	0.000173304	13	NEUROD6/FOXP2/KIRREL3/RARB/FEZF2/SLIT1/SEMA3A/TMEM108/ZMIZ1/RELN/PHACTR1/CDH2/NPY	13/237
GO:0034329	GO:BP	GO:0034329	cell junction assembly	0.000253247	15	SNAI2/KIRREL3/C1QL3/ADGRL2/EPHA3/LRTM2/LRRTM3/LRRTM2/EPHA7/GABRA2/ADGRB1/SPTBN2/ACTN2/LRRC4/CDH2	15/237
GO:0000902	GO:BP	GO:0000902	cell morphogenesis	0.00028557	23	SYT17/ALCAM/KIRREL3/MET/PPFIA2/CPNE6/FEZF2/SLIT1/SEMA3A/EPHA7/TMEM108/DPYSL5/RELN/B3GNT2/KIT/MYO16/RASAL1/EFNB3/COBL/PHACTR1/ARHGEF2/NYAP2/ETV1	23/237
GO:0042391	GO:BP	GO:0042391	regulation of membrane potential	0.000325986	15	GABRA5/GPR88/SEZ6/TMEM108/GABRA2/RELN/KCNA4/GRIK2/KCNMB2/GPD1L/RYR2/PID1/RIMS4/ACTN2/CELF4	15/237
GO:0048513	GO:BP	GO:0048513	animal organ development	0.000340415	47	NEUROD6/PTK7/GABRA5/FOXP2/SNAI2/KIRREL3/BARX2/RARB/RSPO3/LDB2/OVOL2/CCKBR/MET/IFT57/DHRS3/FEZF2/SLIT1/SEZ6/SEMA3A/IGF1/EPHA7/TMEM108/ZMIZ1/NEUROD2/RELN/TGFB3/SELENOM/GIT1/KIT/NECTIN1/TAMALIN/SMARCD3/CRLF1/SPTBN2/ARNT2/SOX11/NELL1/RARA/THRB/COBL/PHACTR1/ACTN2/ETV1/SULF2/CDH2/CELF4/NPY	47/237
GO:0007420	GO:BP	GO:0007420	brain development	0.000644421	19	NEUROD6/FOXP2/KIRREL3/RARB/FEZF2/SLIT1/SEZ6/SEMA3A/EPHA7/TMEM108/ZMIZ1/NEUROD2/RELN/GIT1/SPTBN2/ARNT2/PHACTR1/CDH2/NPY	19/237
GO:0051094	GO:BP	GO:0051094	positive regulation of developmental process	0.000963804	27	SYT17/VWC2L/EGR3/OVOL2/CPNE6/ADGRL2/FEZF2/BRINP2/FOXO6/IGF1/LRTM2/LRRTM3/LRRTM2/ZMIZ1/NEUROD2/RELN/ADGRB1/TGFB3/KIT/RASAL1/SMARCD3/SOX11/NELL1/RARA/COBL/ARHGEF2/XRCC5	27/237
GO:0021543	GO:BP	GO:0021543	pallium development	0.00105792	10	NEUROD6/FOXP2/KIRREL3/FEZF2/TMEM108/ZMIZ1/RELN/PHACTR1/CDH2/NPY	10/237
GO:0099084	GO:BP	GO:0099084	postsynaptic specialization organization	0.00109503	6	C1QL3/TMEM108/RELN/SPTBN2/LRRC4/CDH2	6/237
GO:0016477	GO:BP	GO:0016477	cell migration	0.00124394	30	PLK2/PTK7/PIK3R1/SNAI2/STARD13/KIRREL3/EGR3/LDB2/OVOL2/MET/FEZF2/SLIT1/ADRA2A/IGF1/STAT5A/WWC1/ZMIZ1/RELN/ADGRB1/CAMK1D/GADD45A/KIT/EFNB2/VAV2/TAMALIN/SCG2/PHACTR1/SST/KCTD13/CDH2	30/237
GO:0051049	GO:BP	GO:0051049	regulation of transport	0.00143388	31	KCNG1/PRKCG/KCNH3/PIK3R1/CACNG3/EPHA3/ADRA2A/SHISA9/IGF1/LRRTM2/KCNIP1/RELN/KCNA4/RAB3C/KCNAB1/CAMK1D/TGFB3/GPD1L/GIT1/RYR2/CPLX2/NKAIN2/TMEM132A/PID1/SOX11/KCNF1/DOC2A/SNCG/ACTN2/KCNIP4/CDH2	31/237
GO:0007417	GO:BP	GO:0007417	central nervous system development	0.00150283	22	NEUROD6/FOXP2/KIRREL3/RARB/FEZF2/SLIT1/SEZ6/SEMA3A/BRINP2/EPHA7/TMEM108/ZMIZ1/NEUROD2/RELN/GIT1/EIF2B1/SPTBN2/ARNT2/SOX11/PHACTR1/CDH2/NPY	22/237
GO:0007610	GO:BP	GO:0007610	behavior	0.00156864	18	PLK2/GABRA5/PRKCG/GPR88/KIRREL3/FEZF2/SEZ6/FOXO6/NEUROD2/RELN/GIT1/C1QL1/SPTBN2/EFNB3/THRB/USP46/SNCG/ETV1	18/237
GO:0006357	GO:BP	GO:0006357	regulation of transcription by RNA polymerase II	0.00177266	37	NEUROD6/PIK3R1/SNAI2/SATB1/BCL11A/BARX2/RARB/EGR3/ETV6/LDB2/OVOL2/CREB3L1/MET/FEZF2/CRYM/SMARCA2/EPOP/CDK1/FOXO6/IGF1/WWC1/ZMIZ1/NEUROD2/GADD45A/DACT1/TAMALIN/ARNT2/PID1/SOX11/RARA/CXXC5/THRB/ARHGEF2/TSC22D3/JAZF1/ETV1/NPAS2	37/237
GO:0035295	GO:BP	GO:0035295	tube development	0.00179855	25	PLK2/PTK7/STARD13/RARB/RSPO3/EGR3/OVOL2/CCKBR/CREB3L1/MET/IFT57/EPHA7/ZMIZ1/ADGRB1/KIT/EFNB2/DACT1/TAMALIN/SCG2/CRLF1/SOX11/RARA/THRB/COBL/CDH2	25/237
GO:0010975	GO:BP	GO:0010975	regulation of neuron projection development	0.0019261	13	PTK7/PPFIA2/FEZF2/SEZ6/EPHA3/SEMA3A/EPHA7/DPYSL5/RELN/CAMK1D/EFNB2/EFNB3/COBL	13/237
GO:0051239	GO:BP	GO:0051239	regulation of multicellular organismal process	0.00203234	45	PLK2/PIK3R1/SNAI2/STARD13/RARB/EGR3/OVOL2/CREB3L1/MET/DHRS3/ADGRL2/FEZF2/ADRA2A/SHISA9/IGF1/LRTM2/STAT5A/WWC1/LRRTM3/LRRTM2/EPHA7/TMEM108/ZMIZ1/DPYSL5/RELN/ADGRB1/SHISA6/TGFB3/GPD1L/GIT1/GADD45A/RYR2/KIT/SMARCD3/FCHO1/SOX11/NELL1/RARA/ZNF706/EFNB3/THRB/ARHGEF2/XRCC5/SULF2/CELF4	45/237
GO:0016310	GO:BP	GO:0016310	phosphorylation	0.00288633	36	PLK2/PTK7/PRKCG/PIK3R1/LDB2/MET/PLXNA1/EPHA3/PRPS2/ADRA2A/CDK1/STYK1/IGF1/MAGI1/EPHA7/DYRK2/RELN/LOC100393688/ITPKA/MKNK1/CAMK1D/GPD1L/GADD45A/KIT/VAV2/CRLF1/ST3GAL1/PID1/NELL1/RARA/PIP5K1B/ARHGEF2/GRK5/CDKL5/XRCC5/COPS8	36/237
GO:0032879	GO:BP	GO:0032879	regulation of localization	0.00310471	35	KCNG1/PRKCG/KCNH3/PIK3R1/CACNG3/EPHA3/ADRA2A/SHISA9/CDK1/IGF1/LRRTM2/KCNIP1/RELN/KCNA4/RAB3C/SHISA6/KCNAB1/CAMK1D/TGFB3/GPD1L/GIT1/RYR2/CPLX2/NKAIN2/TMEM132A/PID1/SOX11/KCNF1/DOC2A/SNCG/VIP/SLC26A4/ACTN2/KCNIP4/CDH2	35/237
GO:0048870	GO:BP	GO:0048870	cell motility	0.00495824	31	PLK2/PTK7/PIK3R1/SNAI2/STARD13/KIRREL3/EGR3/LDB2/OVOL2/MET/FEZF2/SLIT1/ADRA2A/IGF1/STAT5A/WWC1/ZMIZ1/RELN/ADGRB1/CAMK1D/GADD45A/KIT/EFNB2/VAV2/TAMALIN/SCG2/PHACTR1/ELMO1/SST/KCTD13/CDH2	31/237
GO:0048167	GO:BP	GO:0048167	regulation of synaptic plasticity	0.0051906	9	PLK2/SHISA9/LRRTM2/NEUROD2/RELN/ADGRB1/ITPKA/GRIK2/CPLX2	9/237
GO:0006366	GO:BP	GO:0006366	transcription by RNA polymerase II	0.00540549	37	NEUROD6/PIK3R1/SNAI2/SATB1/BCL11A/BARX2/RARB/EGR3/ETV6/LDB2/OVOL2/CREB3L1/MET/FEZF2/CRYM/SMARCA2/EPOP/CDK1/FOXO6/IGF1/WWC1/ZMIZ1/NEUROD2/GADD45A/DACT1/TAMALIN/ARNT2/PID1/SOX11/RARA/CXXC5/THRB/ARHGEF2/TSC22D3/JAZF1/ETV1/NPAS2	37/237
GO:0007155	GO:BP	GO:0007155	cell adhesion	0.00554782	27	CD24/PIK3R1/SNAI2/ALCAM/KIRREL3/EGR3/PCDH19/PCDH20/UNC5D/EPHA3/IGF1/MAGI1/EPHA7/ZMIZ1/CDH8/PCDH9/CNTNAP4/POSTN/CDH10/KIT/NECTIN1/EFNB2/FCHO1/RARA/EFNB3/ACTN2/CDH2	27/237
GO:0048583	GO:BP	GO:0048583	regulation of response to stimulus	0.00608401	54	PTK7/PRKCG/PIK3R1/SNAI2/RFTN1/RSPO3/VWC2L/PSD3/OVOL2/C1QL4/CREB3L1/MET/DHRS3/FEZF2/SEZ6/ADRA2A/SHISA9/IGF1/WWC1/EPHA7/TMEM108/ZMIZ1/DYRK2/NEUROD2/RELN/SHISA6/DUSP4/CAMK1D/POSTN/GPD1L/GREM2/GIT1/GADD45A/KIT/EFNB2/DACT1/EIF2B1/RASAL1/SCG2/TMEM132A/PID1/FCHO1/SOX11/RARA/THRB/KCTD13/XRCC5/RNF185/SULF2/CDH2/CELF4/DOK5/SPRY2/NPAS2	54/237
GO:0051960	GO:BP	GO:0051960	regulation of nervous system development	0.0062932	13	ADGRL2/FEZF2/LRTM2/LRRTM3/LRRTM2/EPHA7/DPYSL5/RELN/ADGRB1/SMARCD3/SOX11/EFNB3/XRCC5	13/237
GO:0098742	GO:BP	GO:0098742	cell-cell adhesion via plasma-membrane adhesion molecules	0.0081145	10	ALCAM/KIRREL3/PCDH19/PCDH20/UNC5D/CDH8/PCDH9/CDH10/NECTIN1/CDH2	10/237
GO:0051253	GO:BP	GO:0051253	negative regulation of RNA metabolic process	0.0084153	27	TSHZ3/FOXP2/SNAI2/SATB1/BCL11A/BARX2/RARB/ETV6/OVOL2/CREB3L1/FEZF2/CRYM/SMARCA2/WWC1/SIN3B/GADD45A/DACT1/SOX11/RARA/CXXC5/MTA3/ZNF706/THRB/VIP/JAZF1/XRCC5/CELF4	27/237
GO:0006355	GO:BP	GO:0006355	regulation of DNA-templated transcription	0.0093317	51	NEUROD6/TSHZ3/FOXP2/PIK3R1/SNAI2/SATB1/BCL11A/BARX2/RARB/EGR3/ETV6/LDB2/OVOL2/CREB3L1/MET/FEZF2/CRYM/SMARCA2/EPOP/CDK1/FOXO6/IGF1/STAT5A/WWC1/ZMIZ1/NEUROD2/RELN/CAMK1D/TGFB3/SIN3B/PRR7/GADD45A/KIT/DACT1/TAMALIN/SMARCD3/ARNT2/PID1/SOX11/RARA/CXXC5/MTA3/ZNF706/THRB/ARHGEF2/TSC22D3/ACTN2/JAZF1/XRCC5/ETV1/NPAS2	51/237
GO:0007156	GO:BP	GO:0007156	homophilic cell adhesion via plasma membrane adhesion molecules	0.00973597	8	KIRREL3/PCDH19/PCDH20/CDH8/PCDH9/CDH10/NECTIN1/CDH2	8/237
GO:0048588	GO:BP	GO:0048588	developmental cell growth	0.010067	9	SYT17/CPNE6/SLIT1/SEMA3A/IGF1/EPHA7/TMEM108/RASAL1/COBL	9/237
GO:2001141	GO:BP	GO:2001141	regulation of RNA biosynthetic process	0.0108264	51	NEUROD6/TSHZ3/FOXP2/PIK3R1/SNAI2/SATB1/BCL11A/BARX2/RARB/EGR3/ETV6/LDB2/OVOL2/CREB3L1/MET/FEZF2/CRYM/SMARCA2/EPOP/CDK1/FOXO6/IGF1/STAT5A/WWC1/ZMIZ1/NEUROD2/RELN/CAMK1D/TGFB3/SIN3B/PRR7/GADD45A/KIT/DACT1/TAMALIN/SMARCD3/ARNT2/PID1/SOX11/RARA/CXXC5/MTA3/ZNF706/THRB/ARHGEF2/TSC22D3/ACTN2/JAZF1/XRCC5/ETV1/NPAS2	51/237
GO:0009966	GO:BP	GO:0009966	regulation of signal transduction	0.0109726	44	PTK7/PIK3R1/SNAI2/RSPO3/VWC2L/PSD3/OVOL2/C1QL4/CREB3L1/MET/DHRS3/SEZ6/ADRA2A/SHISA9/IGF1/WWC1/EPHA7/TMEM108/ZMIZ1/DYRK2/NEUROD2/RELN/SHISA6/DUSP4/POSTN/GPD1L/GREM2/GIT1/GADD45A/KIT/DACT1/RASAL1/SCG2/TMEM132A/PID1/SOX11/THRB/KCTD13/RNF185/SULF2/CDH2/CELF4/DOK5/SPRY2	44/237
GO:0097106	GO:BP	GO:0097106	postsynaptic density organization	0.0118241	5	C1QL3/TMEM108/RELN/LRRC4/CDH2	5/237
GO:0045934	GO:BP	GO:0045934	negative regulation of nucleobase-containing compound metabolic process	0.012967	28	TSHZ3/FOXP2/SNAI2/SATB1/BCL11A/BARX2/RARB/ETV6/OVOL2/CREB3L1/FEZF2/CRYM/SMARCA2/WWC1/SIN3B/GADD45A/DACT1/PID1/SOX11/RARA/CXXC5/MTA3/ZNF706/THRB/VIP/JAZF1/XRCC5/CELF4	28/237
GO:0030900	GO:BP	GO:0030900	forebrain development	0.0135078	13	NEUROD6/FOXP2/KIRREL3/RARB/FEZF2/SLIT1/SEMA3A/TMEM108/ZMIZ1/RELN/PHACTR1/CDH2/NPY	13/237
GO:0009893	GO:BP	GO:0009893	positive regulation of metabolic process	0.0141605	53	NEUROD6/PLK2/PRKCG/PIK3R1/BARX2/RARB/EGR3/ETV6/LDB2/OVOL2/CREB3L1/MET/IFT57/FEZF2/SMARCA2/ADRA2A/CDK1/IGF1/WWC1/LRRTM3/EPHA7/ZMIZ1/DYRK2/NEUROD2/RELN/ADGRB1/LARP6/CAMK1D/TGFB3/PRR7/GADD45A/KIT/DACT1/VAV2/TAMALIN/SMARCD3/CRLF1/ARNT2/PID1/SOX11/RARA/THRB/VIP/ARHGEF2/ACTN2/XRCC5/RNF185/ETV1/SULF2/HNRNPAB/CELF4/COPS8/NPAS2	53/237
GO:0007411	GO:BP	GO:0007411	axon guidance	0.0141814	9	ALCAM/FEZF2/SLIT1/SEMA3A/EPHA7/RELN/B3GNT2/EFNB3/ETV1	9/237
GO:0034762	GO:BP	GO:0034762	regulation of transmembrane transport	0.0143193	15	KCNG1/KCNH3/CACNG3/SHISA9/IGF1/KCNIP1/RELN/KCNA4/KCNAB1/GPD1L/RYR2/PID1/KCNF1/ACTN2/KCNIP4	15/237
GO:0008284	GO:BP	GO:0008284	positive regulation of cell population proliferation	0.0147566	23	PTK7/PIK3R1/EGR3/CCKBR/EPHA3/IGF1/STAT5A/ZMIZ1/RELN/CAMK1D/TGFB3/KIT/EFNB2/TAMALIN/SMARCD3/SCG2/CRLF1/PID1/SOX11/RARA/MTA3/COBL/GRK5	23/237
GO:0045892	GO:BP	GO:0045892	negative regulation of DNA-templated transcription	0.0148934	25	TSHZ3/FOXP2/SNAI2/SATB1/BCL11A/BARX2/RARB/ETV6/OVOL2/CREB3L1/FEZF2/CRYM/SMARCA2/WWC1/SIN3B/GADD45A/DACT1/SOX11/RARA/CXXC5/MTA3/ZNF706/THRB/JAZF1/XRCC5	25/237
GO:0097485	GO:BP	GO:0097485	neuron projection guidance	0.0151573	9	ALCAM/FEZF2/SLIT1/SEMA3A/EPHA7/RELN/B3GNT2/EFNB3/ETV1	9/237
GO:1901135	GO:BP	GO:1901135	carbohydrate derivative metabolic process	0.0154067	23	HS3ST2/CHST1/ST6GALNAC5/PRPS2/IGF1/XYLT1/PCSK6/ST6GAL2/ATIC/LARGE1/B3GNT2/GPD1L/KIT/PIGF/ST3GAL1/PID1/ST6GALNAC6/DNPH1/CTPS1/FUCA2/HS3ST4/SULF2/DCTPP1	23/237
GO:0051172	GO:BP	GO:0051172	negative regulation of nitrogen compound metabolic process	0.0157071	36	TSHZ3/PRKCG/FOXP2/TIMP2/SNAI2/SATB1/BCL11A/BARX2/RARB/ETV6/OVOL2/CREB3L1/FEZF2/CRYM/SMARCA2/IGF1/WWC1/ADGRB1/SIN3B/GPD1L/GADD45A/DACT1/TAMALIN/TMEM132A/PID1/SOX11/NELL1/RARA/CXXC5/MTA3/ZNF706/THRB/VIP/JAZF1/XRCC5/CELF4	36/237
GO:1902679	GO:BP	GO:1902679	negative regulation of RNA biosynthetic process	0.0161257	25	TSHZ3/FOXP2/SNAI2/SATB1/BCL11A/BARX2/RARB/ETV6/OVOL2/CREB3L1/FEZF2/CRYM/SMARCA2/WWC1/SIN3B/GADD45A/DACT1/SOX11/RARA/CXXC5/MTA3/ZNF706/THRB/JAZF1/XRCC5	25/237
GO:0120035	GO:BP	GO:0120035	regulation of plasma membrane bounded cell projection organization	0.0163875	15	PTK7/PIK3R1/PPFIA2/FEZF2/SEZ6/EPHA3/SEMA3A/EPHA7/DPYSL5/RELN/CAMK1D/EFNB2/EFNB3/COBL/CDKL5	15/237
GO:0031344	GO:BP	GO:0031344	regulation of cell projection organization	0.0187172	15	PTK7/PIK3R1/PPFIA2/FEZF2/SEZ6/EPHA3/SEMA3A/EPHA7/DPYSL5/RELN/CAMK1D/EFNB2/EFNB3/COBL/CDKL5	15/237
GO:0007167	GO:BP	GO:0007167	enzyme-linked receptor protein signaling pathway	0.0189636	21	PIK3R1/VWC2L/OVOL2/CREB3L1/MET/EPHA3/IGF1/EPHA7/TMEM108/ZMIZ1/LTBP4/TGFB3/GREM2/GIT1/KIT/EFNB2/PID1/SOX11/EFNB3/SULF2/DOK5	21/237
GO:0098609	GO:BP	GO:0098609	cell-cell adhesion	0.0192277	19	ALCAM/KIRREL3/EGR3/PCDH19/PCDH20/UNC5D/IGF1/MAGI1/EPHA7/ZMIZ1/CDH8/PCDH9/CDH10/KIT/NECTIN1/FCHO1/RARA/EFNB3/CDH2	19/237
GO:0051252	GO:BP	GO:0051252	regulation of RNA metabolic process	0.0214992	53	NEUROD6/TSHZ3/FOXP2/PIK3R1/SNAI2/SATB1/BCL11A/BARX2/RARB/EGR3/ETV6/LDB2/OVOL2/CREB3L1/MET/FEZF2/CRYM/SMARCA2/EPOP/CDK1/FOXO6/IGF1/STAT5A/WWC1/ZMIZ1/NEUROD2/RELN/CAMK1D/TGFB3/SIN3B/PRR7/GADD45A/KIT/DACT1/TAMALIN/SMARCD3/ARNT2/PID1/SOX11/RARA/CXXC5/MTA3/ZNF706/THRB/VIP/ARHGEF2/TSC22D3/ACTN2/JAZF1/XRCC5/ETV1/CELF4/NPAS2	53/237
GO:0003008	GO:BP	GO:0003008	system process	0.0215951	32	PLK2/GABRA5/SNAI2/GPR88/CCKBR/CRYM/SEZ6/ADRA2A/SHISA9/FOXO6/IGF1/TMEM108/NEUROD2/RELN/OTOS/SHISA6/GRIK2/B3GNT2/KCNMB2/GPD1L/SELENOM/GIT1/GFY/RYR2/KIT/C1QL1/GRM7/THRB/JAKMIP1/SULF2/CELF4/NPY	32/237
GO:0048013	GO:BP	GO:0048013	ephrin receptor signaling pathway	0.0255037	5	EPHA3/EPHA7/GIT1/EFNB2/EFNB3	5/237
GO:0048589	GO:BP	GO:0048589	developmental growth	0.0273523	16	SYT17/PTK7/RARB/CPNE6/SLIT1/SEMA3A/IGF1/WWC1/EPHA7/TMEM108/ZMIZ1/SELENOM/RASAL1/SPTBN2/RARA/COBL	16/237
GO:0080090	GO:BP	GO:0080090	regulation of primary metabolic process	0.0275783	71	NEUROD6/PLK2/TSHZ3/PRKCG/FOXP2/TIMP2/PIK3R1/SNAI2/SATB1/BCL11A/BARX2/RARB/EGR3/ETV6/LDB2/OVOL2/CREB3L1/MET/IFT57/FEZF2/CRYM/SMARCA2/ADRA2A/EPOP/CDK1/FOXO6/IGF1/STAT5A/WWC1/LRRTM3/EPHA7/ZMIZ1/DYRK2/NEUROD2/RELN/ADGRB1/LARP6/CAMK1D/TGFB3/SIN3B/PRR7/GPD1L/GIT1/GADD45A/KIT/DACT1/VAV2/TAMALIN/SMARCD3/CRLF1/TMEM132A/ARNT2/PID1/SOX11/NELL1/RARA/CXXC5/MTA3/ZNF706/THRB/VIP/ARHGEF2/TSC22D3/ACTN2/JAZF1/XRCC…	71/237
GO:0060560	GO:BP	GO:0060560	developmental growth involved in morphogenesis	0.0321476	9	SYT17/PTK7/CPNE6/SLIT1/SEMA3A/EPHA7/TMEM108/RASAL1/COBL	9/237
GO:0006351	GO:BP	GO:0006351	DNA-templated transcription	0.0330277	51	NEUROD6/TSHZ3/FOXP2/PIK3R1/SNAI2/SATB1/BCL11A/BARX2/RARB/EGR3/ETV6/LDB2/OVOL2/CREB3L1/MET/FEZF2/CRYM/SMARCA2/EPOP/CDK1/FOXO6/IGF1/STAT5A/WWC1/ZMIZ1/NEUROD2/RELN/CAMK1D/TGFB3/SIN3B/PRR7/GADD45A/KIT/DACT1/TAMALIN/SMARCD3/ARNT2/PID1/SOX11/RARA/CXXC5/MTA3/ZNF706/THRB/ARHGEF2/TSC22D3/ACTN2/JAZF1/XRCC5/ETV1/NPAS2	51/237
GO:0032940	GO:BP	GO:0032940	secretion by cell	0.0333708	17	PRKCG/ADRA2A/IGF1/PCSK6/RAB3C/LTBP4/TGFB3/SELENOM/GIT1/KIT/CPLX2/TMEM132A/SOX11/DOC2A/SNCG/VIP/RIMS4	17/237
GO:0016358	GO:BP	GO:0016358	dendrite development	0.0341028	9	PPFIA2/FEZF2/SEZ6/FOXO6/DPYSL5/RELN/CAMK1D/COBL/PHACTR1	9/237
GO:0150146	GO:BP	GO:0150146	cell junction disassembly	0.040665	4	PIK3R1/SNAI2/TGFB3/C1QL1	4/237
GO:0032774	GO:BP	GO:0032774	RNA biosynthetic process	0.0424047	51	NEUROD6/TSHZ3/FOXP2/PIK3R1/SNAI2/SATB1/BCL11A/BARX2/RARB/EGR3/ETV6/LDB2/OVOL2/CREB3L1/MET/FEZF2/CRYM/SMARCA2/EPOP/CDK1/FOXO6/IGF1/STAT5A/WWC1/ZMIZ1/NEUROD2/RELN/CAMK1D/TGFB3/SIN3B/PRR7/GADD45A/KIT/DACT1/TAMALIN/SMARCD3/ARNT2/PID1/SOX11/RARA/CXXC5/MTA3/ZNF706/THRB/ARHGEF2/TSC22D3/ACTN2/JAZF1/XRCC5/ETV1/NPAS2	51/237
GO:0045666	GO:BP	GO:0045666	positive regulation of neuron differentiation	0.0474016	6	VWC2L/FEZF2/BRINP2/NEUROD2/SOX11/ARHGEF2	6/237
GO:0051173	GO:BP	GO:0051173	positive regulation of nitrogen compound metabolic process	0.0496771	44	NEUROD6/PLK2/PRKCG/PIK3R1/BARX2/RARB/EGR3/ETV6/LDB2/OVOL2/MET/IFT57/FEZF2/SMARCA2/ADRA2A/IGF1/WWC1/LRRTM3/EPHA7/ZMIZ1/NEUROD2/RELN/LARP6/TGFB3/PRR7/KIT/DACT1/TAMALIN/SMARCD3/CRLF1/ARNT2/PID1/SOX11/RARA/THRB/VIP/ARHGEF2/ACTN2/XRCC5/RNF185/ETV1/CELF4/COPS8/NPAS2	44/237
GO:0045202	GO:CC	GO:0045202	synapse	1.90667071684212e-16	45	GABRG1/GABRA5/PRKCG/KIRREL3/VWC2L/EGR3/PPFIA2/CACNG3/C1QL3/ADGRL2/SLC35F1/SEZ6/ADRA2A/SHISA9/LRRTM3/LRRTM2/NETO2/EPHA7/TMEM108/GABRA2/CDH8/ADGRB1/RAB3C/SHISA6/GRIK2/GIT1/NECTIN1/C1QL1/TAC1/CPLX2/GRM7/SPTBN2/DOC2A/EFNB3/CAPN5/SNCG/RIMS4/SST/LRRC4/CDKL5/CDH2/CELF4/NPY/SYNPR/CALB2	45/260
GO:0030054	GO:CC	GO:0030054	cell junction	7.87776229365731e-14	52	GABRG1/PTK7/GABRA5/PRKCG/PIK3R1/KIRREL3/VWC2L/EGR3/PPFIA2/CACNG3/C1QL3/ADGRL2/SLC35F1/SEZ6/ADRA2A/SHISA9/MAGI1/LRRTM3/LRRTM2/NETO2/EPHA7/TMEM108/GABRA2/CDH8/ADGRB1/RAB3C/SHISA6/GRIK2/GIT1/KIT/NECTIN1/C1QL1/TAC1/AFAP1/CPLX2/GRM7/SPTBN2/DOC2A/EFNB3/CAPN5/SNCG/ARHGEF2/RIMS4/ACTN2/SST/LRRC4/CDKL5/CDH2/CELF4/NPY/SYNPR/CALB2	52/260
GO:0071944	GO:CC	GO:0071944	cell periphery	1.22988611917818e-12	92	KCNG1/GABRG1/PTK7/GABRA5/TSHZ3/PRKCG/ANO3/ALCAM/RFTN1/KIRREL3/VWC2L/PCDH19/PSD3/LDB2/CCKBR/MET/CACNG3/CPNE6/PCDH20/PLXNA1/UNC5D/ADGRL2/EPHA3/ADRA2A/SHISA9/STYK1/IGF1/MAGI1/LY6E/WWC1/LRRTM3/LRRTM2/NETO2/PCSK6/ENOX1/EPHA7/GABRA2/ADAMTS9/REM2/KCNIP1/CDH8/RELN/ADGRB1/KCNA4/RAB3C/SHISA6/PCDH9/GRIK2/VXN/LRATD2/KCNAB1/LTBP4/POSTN/TGFB3/CDH10/KCNMB2/PRR7/GPD1L/KIT/NECTIN1/EFNB2/EIF2B1/CA11/VAV2/RASAL1/MP…	92/260
GO:0005886	GO:CC	GO:0005886	plasma membrane	9.57031191462838e-12	86	KCNG1/GABRG1/PTK7/GABRA5/TSHZ3/PRKCG/ANO3/ALCAM/RFTN1/KIRREL3/VWC2L/PCDH19/PSD3/LDB2/CCKBR/MET/CACNG3/CPNE6/PCDH20/PLXNA1/UNC5D/ADGRL2/EPHA3/ADRA2A/SHISA9/STYK1/IGF1/MAGI1/LY6E/WWC1/LRRTM3/LRRTM2/NETO2/ENOX1/EPHA7/GABRA2/REM2/KCNIP1/CDH8/RELN/ADGRB1/KCNA4/RAB3C/SHISA6/PCDH9/GRIK2/VXN/LRATD2/KCNAB1/CDH10/KCNMB2/PRR7/GPD1L/KIT/NECTIN1/EFNB2/EIF2B1/CA11/VAV2/RASAL1/MPP6/NKAIN2/ARL4D/TMEM132A/GRM7/SY…	86/260
GO:0016020	GO:CC	GO:0016020	membrane	7.34577429195575e-11	141	CYP26A1/KCNG1/SYT17/GABRG1/HS3ST2/PTK7/GABRA5/CTXN1/TSHZ3/PRKCG/ANO3/KCNH3/PIK3R1/GPR88/ALCAM/RFTN1/KIRREL3/VWC2L/PCDH19/PSD3/LDB2/CCKBR/MARCHF1/CREB3L1/MET/CHST1/STUM/CACNG3/CPNE6/PCDH20/PLXNA1/UNC5D/ADGRL2/SLC35F1/SEZ6/ST6GALNAC5/EPHA3/ADRA2A/SHISA9/TRHDE/STYK1/IGF1/MAGI1/TP53I11/LY6E/LRTM2/FAM163B/WWC1/LRRC3B/XYLT1/LRRTM3/LRRTM2/CACHD1/NETO2/CRACDL/DPY19L1/ENOX1/CHCHD6/EPHA7/TMEM108/GABRA2/TME…	141/260
GO:0097060	GO:CC	GO:0097060	synaptic membrane	2.00535891799677e-08	17	GABRG1/GABRA5/PRKCG/CACNG3/ADGRL2/SHISA9/LRRTM3/LRRTM2/NETO2/GABRA2/CDH8/SHISA6/GRIK2/NECTIN1/EFNB3/RIMS4/LRRC4	17/260
GO:0036477	GO:CC	GO:0036477	somatodendritic compartment	2.74085201713078e-08	21	GABRA5/PRKCG/ALCAM/KIRREL3/SERPINI1/IFT57/PPFIA2/CACNG3/CPNE6/SEZ6/SHISA9/TMEM108/GABRA2/DPYSL5/RELN/ADGRB1/GRM7/SPTBN2/COBL/SNCG/LRRC4	21/260
GO:0098794	GO:CC	GO:0098794	postsynapse	1.36073922539939e-07	21	GABRG1/GABRA5/PRKCG/PPFIA2/CACNG3/ADGRL2/SEZ6/SHISA9/LRRTM3/LRRTM2/NETO2/TMEM108/GABRA2/ADGRB1/SHISA6/GRIK2/GIT1/SPTBN2/LRRC4/CDH2/CELF4	21/260
GO:0098793	GO:CC	GO:0098793	presynapse	9.85214003297187e-07	17	PRKCG/KIRREL3/SLC35F1/ADRA2A/GABRA2/CDH8/RAB3C/GIT1/NECTIN1/C1QL1/CPLX2/SPTBN2/DOC2A/EFNB3/CDH2/SYNPR/CALB2	17/260
GO:0098984	GO:CC	GO:0098984	neuron to neuron synapse	2.53694187491885e-06	14	PRKCG/CACNG3/C1QL3/SHISA9/LRRTM3/NETO2/TMEM108/ADGRB1/SHISA6/NECTIN1/C1QL1/EFNB3/LRRC4/CDH2	14/260
GO:0030425	GO:CC	GO:0030425	dendrite	1.27301567545673e-05	15	GABRA5/PRKCG/KIRREL3/IFT57/PPFIA2/CPNE6/SEZ6/SHISA9/GABRA2/DPYSL5/RELN/ADGRB1/GRM7/COBL/LRRC4	15/260
GO:0043005	GO:CC	GO:0043005	neuron projection	1.3330996574693e-05	24	GABRA5/PRKCG/ALCAM/KIRREL3/IFT57/PPFIA2/CPNE6/SEZ6/SHISA9/TMEM108/GABRA2/DPYSL5/CDH8/RELN/ADGRB1/KCNA4/GIT1/KIAA1549/C1QL1/CPLX2/GRM7/COBL/SNCG/LRRC4	24/260
GO:0097447	GO:CC	GO:0097447	dendritic tree	1.35326818713999e-05	15	GABRA5/PRKCG/KIRREL3/IFT57/PPFIA2/CPNE6/SEZ6/SHISA9/GABRA2/DPYSL5/RELN/ADGRB1/GRM7/COBL/LRRC4	15/260
GO:0034702	GO:CC	GO:0034702	monoatomic ion channel complex	2.18084989426846e-05	15	KCNG1/GABRG1/GABRA5/VWC2L/CACNG3/SHISA9/GABRA2/KCNIP1/KCNA4/SHISA6/KCNAB1/KCNMB2/RYR2/KCNF1/KCNIP4	15/260
GO:0099634	GO:CC	GO:0099634	postsynaptic specialization membrane	3.02135755420649e-05	8	CACNG3/SHISA9/LRRTM3/LRRTM2/NETO2/GABRA2/SHISA6/LRRC4	8/260
GO:0045211	GO:CC	GO:0045211	postsynaptic membrane	3.47062473700222e-05	12	GABRG1/GABRA5/CACNG3/ADGRL2/SHISA9/LRRTM3/LRRTM2/NETO2/GABRA2/SHISA6/GRIK2/LRRC4	12/260
GO:0099572	GO:CC	GO:0099572	postsynaptic specialization	6.34370113313054e-05	12	PRKCG/CACNG3/SHISA9/LRRTM3/LRRTM2/NETO2/TMEM108/GABRA2/ADGRB1/SHISA6/LRRC4/CDH2	12/260
GO:0042995	GO:CC	GO:0042995	cell projection	9.29347135879607e-05	36	GABRA5/PRKCG/GPR88/ALCAM/KIRREL3/PSD3/IFT57/PPFIA2/CPNE6/SEZ6/SHISA9/MAGI1/WWC1/TMEM108/GABRA2/DPYSL5/CDH8/RELN/ADGRB1/DNAJB13/KCNA4/GIT1/KIAA1549/C1QL1/CPLX2/GRM7/KCNF1/COBL/SNCG/PIP5K1B/ARHGEF2/SLC26A4/ACTN2/LRRC4/CDKL5/CDH2	36/260
GO:0120025	GO:CC	GO:0120025	plasma membrane bounded cell projection	0.000100138	35	GABRA5/PRKCG/GPR88/ALCAM/KIRREL3/PSD3/IFT57/PPFIA2/CPNE6/SEZ6/SHISA9/WWC1/TMEM108/GABRA2/DPYSL5/CDH8/RELN/ADGRB1/DNAJB13/KCNA4/GIT1/KIAA1549/C1QL1/CPLX2/GRM7/KCNF1/COBL/SNCG/PIP5K1B/ARHGEF2/SLC26A4/ACTN2/LRRC4/CDKL5/CDH2	35/260
GO:0098978	GO:CC	GO:0098978	glutamatergic synapse	0.000110399	15	CACNG3/C1QL3/ADGRL2/SHISA9/LRRTM3/NETO2/EPHA7/CDH8/SHISA6/C1QL1/CPLX2/SPTBN2/EFNB3/LRRC4/CDKL5	15/260
GO:0098590	GO:CC	GO:0098590	plasma membrane region	0.000119658	26	GABRG1/GABRA5/PRKCG/PSD3/MET/CACNG3/ADGRL2/SHISA9/WWC1/LRRTM3/LRRTM2/NETO2/GABRA2/CDH8/SHISA6/GRIK2/NECTIN1/CA11/SPTBN2/FCHO1/EFNB3/ARHGEF2/RIMS4/SLC26A4/LRRC4/CDH2	26/260
GO:0032279	GO:CC	GO:0032279	asymmetric synapse	0.000233091	11	PRKCG/CACNG3/SHISA9/LRRTM3/NETO2/TMEM108/ADGRB1/SHISA6/C1QL1/LRRC4/CDH2	11/260
GO:1902495	GO:CC	GO:1902495	transmembrane transporter complex	0.00071699	15	KCNG1/GABRG1/GABRA5/VWC2L/CACNG3/SHISA9/GABRA2/KCNIP1/KCNA4/SHISA6/KCNAB1/KCNMB2/RYR2/KCNF1/KCNIP4	15/260
GO:0098839	GO:CC	GO:0098839	postsynaptic density membrane	0.00117902	6	CACNG3/SHISA9/LRRTM3/NETO2/SHISA6/LRRC4	6/260
GO:0014069	GO:CC	GO:0014069	postsynaptic density	0.00121098	10	PRKCG/CACNG3/SHISA9/LRRTM3/NETO2/TMEM108/ADGRB1/SHISA6/LRRC4/CDH2	10/260
GO:1990351	GO:CC	GO:1990351	transporter complex	0.00141843	15	KCNG1/GABRG1/GABRA5/VWC2L/CACNG3/SHISA9/GABRA2/KCNIP1/KCNA4/SHISA6/KCNAB1/KCNMB2/RYR2/KCNF1/KCNIP4	15/260
GO:0030424	GO:CC	GO:0030424	axon	0.00291395	13	PRKCG/ALCAM/KIRREL3/CPNE6/TMEM108/GABRA2/CDH8/KCNA4/GIT1/C1QL1/CPLX2/COBL/SNCG	13/260
GO:0008076	GO:CC	GO:0008076	voltage-gated potassium channel complex	0.0032151	7	KCNG1/KCNIP1/KCNA4/KCNAB1/KCNMB2/KCNF1/KCNIP4	7/260
GO:0032281	GO:CC	GO:0032281	AMPA glutamate receptor complex	0.00584113	4	VWC2L/CACNG3/SHISA9/SHISA6	4/260
GO:0034705	GO:CC	GO:0034705	potassium channel complex	0.00705393	7	KCNG1/KCNIP1/KCNA4/KCNAB1/KCNMB2/KCNF1/KCNIP4	7/260
GO:0060076	GO:CC	GO:0060076	excitatory synapse	0.00811277	5	SHISA6/C1QL1/SPTBN2/LRRC4/CALB2	5/260
GO:0044305	GO:CC	GO:0044305	calyx of Held	0.0110115	3	PRKCG/GIT1/CPLX2	3/260
GO:0005576	GO:CC	GO:0005576	extracellular region	0.0442898	30	TIMP2/CORT/KIRREL3/SERPINI1/RSPO3/VWC2L/C1QL4/C1QL3/SLIT1/IGF1/XYLT1/PCSK6/PCSK2/ADAMTS9/CDH8/RELN/ADGRB1/TGFB3/GREM2/KIT/C1QL1/TAC1/SCG2/CRLF1/VIP/FUCA2/SLC26A4/SST/SULF2/NPY	30/260
GO:0005515	GO:MF	GO:0005515	protein binding	7.80949866084363e-05	137	KCNG1/NEUROD6/PLK2/KHDRBS3/FOXP2/ANO3/TIMP2/PIK3R1/NEUROG2/STARD13/ALCAM/CORT/RSPO3/VWC2L/PPP1R3A/ETV6/LDB2/CCKBR/C1QL4/CREB3L1/MET/PPFIA2/C1QL3/PLXNA1/UNC5D/SLIT1/CRYM/SMARCA2/EPHA3/KCTD4/SEMA3A/ADRA2A/SHISA9/CDK1/IGF1/MAGI1/LRTM2/STAT5A/WWC1/LRRC3B/LRRTM3/LRRTM2/NETO2/PCSK6/KIF16B/EPHA7/ZMIZ1/SLA/FBXO32/NWD2/NEUROD2/C5H17orf58/POLE4/CDH8/RELN/OMG/ADGRB1/DNAJB13/RAPGEF2/KCNA4/RAB3C/SHISA6/SPATS2…	137/253
KEGG:04080	KEGG	KEGG:04080	Neuroactive ligand-receptor interaction	0.0156432	13	GABRG1/CORT/CCKBR/ADRA2A/GABRA2/GRIK2/TAC1/GRM7/GRM2/THRB/VIP/SST/NPY	13/92
KEGG:05214	KEGG	KEGG:05214	Glioma	0.0216929	6	PRKCG/PIK3R1/IGF1/CAMK1D/GADD45A/SHC3	6/92
