# Supplementary material for: Molecular architecture of primate specific neural circuit formation
Source: Research Square preprint supplement (doi:10.21203/rs.3.rs-4082064/v1), 2024-03-22
Supplement: Supplementary file 4 [file e8662f4999bea84152dbea74.xlsx]

## Sheet: V1_P16
P16_L1	P16_L2	P16_L3	P16_L4a	P16_L4b	P16_L5	P16_L6
IGF2	MDGA1	PENK	TPBG	LOC118144273	TOX	SYT6
ACTA2	ARHGDIB	CCN2	HTR2A	ASGR2	CYP26B1	PDYN
ELN	DACT1	CALB1	TRPM3	LOC103796120	PCP4L1	SOSTDC1
NDNF	THBS1	THBS1	ZBTB34	FAM110A	FEZF2	STAC2
CCL24	GRB14	ABI3BP	UNC13B	TRPC3	GALNT14	NXPH3
COL1A1	NRP2	CPNE8	F7	GPR6	SORCS2	SMIM32
COL3A1	DOC2B	CNTNAP2	WHRN	BTBD3	LMO3	TLE4
COL1A2	PCDH8	NRP2	LOC103794917	TUBA8	ETV1	SEMA3E
ISLR	CRH	OSTN	LMO7	ADAMTS17	TRIB1	CDKN1A
MMP2	CALB2	GPD1	BRINP1	NTNG1	ARHGAP20	NPTX1
C7	NPY1R	CD40		CPNE9	HS3ST2	CBLN2
LUM	DAB1	ARHGDIB		CNTN3	PCP4	LRRC55
MDK	SLIT3	TAFA1		VAV3	EPOP	CYP26B1
MYL9	ASIC2	ITPKA		SCN1B	CXXC4	PDE1A
TAGLN	ADARB2	BCL6		TAFA2	NEUROD6	NEFM
COLEC12	ELFN1	NECTIN3		TIAM1	SLC24A2	SERTM1
CFD	ADCYAP1	COL26A1		FAM43A	NCAM2	OTOS
COL6A1	KLHL1	LOC108589028		CLCN2	HTR2A	SMIM43
COL18A1	HS6ST3	LOC100409974		CUX1	ELAVL2	GRIK3
OLFML3	MEIS2	PTPRT		CHRD	CNIH3	EFHD2
PCOLCE	CACHD1	FLRT2		PLCH1		SEL1L3
RELN	BHLHE40	LINGO2		BACH1		NR4A2
LAMA2	SYT17	CNTN3		ZBTB34		CPLX3
PRELP	KIRREL3	CUX2		CITED2		HS3ST4
SERPINF1	TMEM158	OCM2		LIN7A		GUCY1A1
AEBP1	LOC100396938	ARPP19		BRINP3		PCSK1
ZIC1	NR2F2	CUX1		CDH18		NFIA
DCN	NRIP1	DUSP14		C11H11orf87		TMEM178A
FMOD	TAFA1	SLC29A1		PRDM8		SH3GL2
CD248	WSCD2	KCNV1		KLHL32		WLS
COL6A3	CLDN10	TMEM132D		BACE2		OLFM3
VWF	CPNE2	EGR3		PVALB		NRSN1
SVIL	GRIN3A	SLC6A11		GALNT14		RASGRP1
BGN	DTNBP1	RIT2		KCNH7		PCDH17
MFAP5	ANKRD6	TMEM215		FAM189A1		KIT
NID1	MYCN	CTNNA2		GASK1B		B3GALT2
SLC6A20	GRM1	SMARCA2		RORA		NEFL
ANXA2	SMARCA2	NCALD		STARD4		GNG2
NR2F2	RASGRP2	EPHB6		FAT3		ZNF385D
LGALS1	TMEM196	PMEPA1		HTR2A		RPRML
COL6A2	PDZRN3	CRHR1		LOC108589028		CPNE5
COL12A1	THSD7A	EML1		VSTM2B		RASL10A
TM4SF1	IGSF3	PDZRN3		GABRG2		ASAP2
MRC2	ENC1	PLPP2		F7		PLXNA2
SLC22A2	SIAE	NRIP1		LOC103794917		TBR1
HSPG2	GDF10	BTBD8		UST		FEZF2
CYBRD1	BCL6	MAL2		GABRA1		SSTR1
APOD	NPAS4	ECE2		FLRT3		SLC24A2
LAMB2	DPP10	TMEM196		LMO3		C11H11orf96
MXRA8	EPHA6	ADCYAP1		LRRTM1		PPP1R1A
MSTN	LAMB1	CABLES1		CNTNAP5		KHDRBS3
SLC13A4	SEZ6L			KCNIP3		CXXC5
ZIC2	EML1			FJX1		ETV5
LGALS3BP	CUX2			KHDRBS2		LRP8
IGFBP3	ID2			RORB		KIAA1217
FN1	RBP4			MATN4		RAB26
VIM	PTPRF			SEC14L1		NRIP3
S100A11				SMAD3		PEG10
SLC7A11				PER3		UGP2
				PAG1		HS3ST2
				BRINP1		TM6SF1
				KITLG		GNB4
				MMP17		CDKL2
				FHL2		BAALC
				FBXO34
				CAMK2G
				CACNA2D1
				EXTL2
				NCEH1

## Sheet: V1_3m
3m_L1	3m_L2	3m_L3a	3m_L3b	3m_4a	3m_L4b	3m_L5	3m_L6
IGF2	LOC118147319	HS6ST3	PENK	LOC103796120	TACSTD2	HS3ST2	SYT6
DCN	CALB2	RAP2A	CALB1	USH1C	ASGR2	MKX	NXPH3
COL1A2	PDZD2	IPO5	SYT2	KCNS1	LOC103796120	GALNT14	SEMA3E
CXCL14	CNR1	STK24	SLITRK5	SYT2	RAB3B	ETV1	KRT17
CCL24	PCDH8	DOCK9	HS6ST3	MATN4	TMEM132E	FEZF2	TLE4
APOD	HPCAL1	UBAC2	MBNL2	VAMP1	RADIL	RPRM	PDYN
FN1	LZTS1	NALCN	IPO5	TACSTD2	PTGS1	NTNG2	PDE1A
RELN	MYO1B	FAM155A	NALCN	PTGS1	HTR1B	KRT17	ATP6AP1L
VIM	DUSP4	IRS2	FGF14	KCNC4	ADAMTS17	CXXC4	FEZF2
MGP	DRD1	ARHGEF7	FAM155A	TRPC3	NTNG1	STK24	NEUROD6
IGFBP3	ADCYAP1	MCF2L	IRS2	HOMER3	TRPC3	NALCN	LRRC55
AHNAK	TMEM158	TFDP1	MCF2L	SCN4B	TMEM215	ARGLU1	B3GALT2
HS6ST3	MN1	SLITRK1	SLITRK1	RASD2	PHACTR2	ANKRD10	GUCY1A1
IPO5	NPTX2	MYCBP2	NDFIP2	RADIL	HOMER3	ARHGEF7	RPRM
FGF14	HS6ST3	LMO7	MYCBP2	HAPLN4	LNX2	GAS6	HS3ST4
PCDH17	MBNL2	PCDH8	LMO7	RORA	BTBD3	SPRY2	TPD52L1
PCDH8	IPO5	FAM120A	MZT1	MBNL2	LRRTM1	RBM26	TMEM178A
ITM2B	STK24	DAPK1	CAB39L	FGF14	FAM110A	MYCBP2	STAC2
SHC3	DOCK9	RORB	HTR2A	HTR2A	BHLHE22	MZT1	EFHD2
DAPK1	TM9SF2	ZFAND5	ESD	SLC24A2	RORA	PCDH9	RPRML
GOLM1	FGF14	GDA	WNK2	TMEM215	MYO5C	PCDH20	MCTP1
NTRK2	FAM155A	KLF9	CTSL	AIFM3	HS6ST2	PCDH17	NPTX1
TLE1	IRS2	PIP5K1B	DAPK1		PDCD4	SUCLA2	GRIK3
PSAT1	ANKRD10	ISCA1	RORB		HTR2A	HTR2A	NR4A2
SMARCA2	ARHGEF7	GOLM1	ZFAND5		DLG5	WNK2	RAB26
NFIB	MCF2L	NTRK2	KLF9		PARM1	SPIN1	LRRN2
LINGO2	TFDP1	TLE1	PIP5K1B		RIMS3	SHC3	SLC35F1
UBE2R2	SLITRK1	GNAQ	ISCA1		CALN1	DIRAS2	SMIM32
ENHO	NDFIP2	VPS13A	TLE1		TIAM1	HABP4	RASGRP1
GABBR2	RBM26	SMARCA2	VPS13A		TSPAN9	PRUNE2	NFIA
SEC61B	MYCBP2	NFIB	SMARCA2		KCNS1	RORB	PPP1R1A
DAB2IP	LMO7	PSIP1	PTPRD		VAV3	ZFAND5	CPLX2
LHX2	MZT1	FOCAD	ZDHHC21		LMO3	APBA1	CRTAC1
RPL35	PCDH17	LINGO2	RRAGA		SLC2A13	HNRNPK	GNG2
HSPA5	SUGT1	DNAJA1	FOCAD		RASD2	UBQLN1	PCDH17
RALGPS1	FAM120A	BAG1	LINGO2		FAM43A	TLE4	CAB39L
GARNL3	SPIN1	ENHO	NDUFB6		KCNC4	VPS13A	ELAVL2
RPL12	SHC3	LOC100397075	TMEM215		TAFA2	SH3GL2
CDK9	DAPK1	DNAJB5	DNAJA1		NCKIPSD	SLC24A2
ENG	GDA	UNC13B	BAG1		CITED2	ELAVL2
SET	KLF9	RUSC2	UBE2R2			FAM163B
LRRC8A	APBA1	TESK1	ENHO
SH3GLB2	PIP5K1B	TMEM8B	LOC100397075
IER5L	ISCA1	TOMM5	DNAJB5
NCS1	GOLM1	LOC100392493	STOML2
PRRC2B	NTRK2	GABBR2	UNC13B
RAPGEF1	HNRNPK	SEC61B	RUSC2
SURF4	UBQLN1	PALM2AKAP2	TMEM8B
FAM163B	TLE1	BRINP1	TOMM5
VAV2	GNAQ	DAB2IP	LOC100392493
NACC2	SMARCA2	TTLL11	GABBR2
RABL6	SLC1A1	RC3H2	SEC61B
PTGDS	NFIB	LHX2	RAD23B
CYB5R3	PSIP1	ARPC5L	BRINP1
TNRC6B	RRAGA	PPP6C	TTLL11
	RPS6	RALGPS1	NDUFA8
	FOCAD	GARNL3
		STXBP1

## Sheet: V1_6m
6m_L1	6m_L2	6m_L3	6m_L4a	6m_L4b	6m_L5	6m_L6
LOC100410611	CALB2	CAMK2N1	MAG	ASGR2	PCP4	SYT6
LOC103787296	ENC1	CDK19	MBP	BTBD3	KRT17	KRT17
ND4L	OCM2	IGFBP2	PLP1	TIAM1	RPRM	PDYN
RELN	YJEFN3	NECAB1	SYT2	BHLHE22	RAB26	SEMA3E
ND1	CNR1	NR4A1	RNASE1	HTR2A	ETV1	PDE1A
GFAP	TAFA1	KCNH5	CNP	LRRTM1	PDE1A	NXPH3
ATP8	TESPA1	PRKCA	SCRT1	PCP4	FAM163B	NPTX1
LOC118142868	MN1	CNTNAP2	SCN1B	SCN1B	RAB3C	RPRM
ADIRF	CTXN1	NRGN	SCN4B	NTNG1	TTC9B	TMEM178A
ND3	TAMALIN	CTNNA2	CRYAB	CTNND1	EFHD2	CPLX2
APOC1	CALM2	CUX2	RIMS3	SMYD2	IGFBP4	ATP2B4
ND4	CACNG3	SLC30A3	TF	CITED2	HS3ST4	EFHD2
RPL30	HS6ST3	CALB1	KCNS1	PTGS1	CRYM	GUCY1A1
RPS27	EGR3	RFTN1	CIT	TMEM215	STAC2	GRIK3
SPARC	CUX2	SCN1B	MAL	PVALB	LMO3	SYNPR
ND2	ITPKA	PPP3CA	ANK1	GAD1	GUCY1A1	RAB26
COX1	VSNL1	YJEFN3	IGFBP2	VAV3	DIRAS2	GNG2
RPS29	AK5	TESPA1	CUX1	GAD2	INF2	STAC2
GAL	SOWAHA	BHLHE40	PITPNM1	NCKIPSD	PHYHIPL	TTC9B
VIM	CA10		KCNIP2	PITPNM1	TMEM178A	RASGRP1
RPL23A	SORBS2		AIFM3	RIMS3	ZYX	PODXL2
LOC118151249	DOC2A		NACC2	PCP4L1	NDRG4	PPP1R1A
GJA1	KCTD1		VAMP1	SLC2A13	NXPH3	SNCA
S100A1	CAMK2N1		CPLX1	TAFA2	ELAVL2	TBR1
SLC1A3	DRD1		BTBD3	KCNAB3	FXYD6	NFIA
LOC100894903	RASL10A		BHLHE22	CIT	PCP4L1	TLE4
LOC118145580	CPNE6		NEFH	RASD2	KIAA0513	SCG3
RPL32	SST			MGLL	ID2	UGP2
LOC100404252	PKIG			DNER	ELAVL4	ADCY1
RARRES2	CNTNAP2			CUX1	ATP2B4	LOC100386451
LOC100412233	PITPNM2			DHRS11	IGSF21	ASAP2
RPL37	PCSK2			CPNE9	SYT6	MAP1B
FABP7	LOC100414591			LMO3	CDK14	ELAVL2
CALB2	HPCA			CERK	TENM3	TENM3
RPS19	NSG2			UBE2E3	JAZF1	DIRAS2
APOD	S100A16			CCDC136	HR	HS3ST4
RPLP1	YWHAH			PLCH2	SNCA	VXN
DBI	TMSB10			RASL10B	NRIP3	IVNS1ABP
RPS20	ARPP19			TCEAL5	PODXL2	ID2
RPS9	PPFIA2			LGI4	MPPED1	BCAT1
MOXD1	SCN3B			PRDM8	SCG2	SERPINE2
RPL35	CTNNA2			LSAMP		STXBP5
APOE	ATP2B1			RELL2		RYR2
RPL23	B3GAT1			EXTL2		SLC35F1
AQP4	EPB41L2			OCIAD2		SH3BGRL3
FCGRT	SESTD1			PARM1		ARL4D
VTN	JPH4			NAP1L3		PKIA
CNR1	PLXNA2			SPOCK2		ARHGDIG
NTSR2	PLCB1			TUBA8		FAM3C
PLTP	FAM131A			TMSB15B		KCNA1
CLDN5	RAMP1			DCLK1		PFKP
CALCA	LY6E			CHGA		CRTAC1
IGFBP5	PTK2B			FXYD7		GAP43
SERF2	SERPINE2			CSDC2		LHFPL6
	FKBP1A			TCEAL3		CRYM
						GLS
						IFI6
						NEFM
						TAGLN3
						SFXN3
						NPY
						SLC24A2

## Sheet: V1_common
L1	L2	L3a	L3b	L4a	L4b	L5	L6
RELN	CALB2				ASGR2	ELAVL2	SYT6
APOD					BTBD3		PDYN
VIM					TAFA2		TLE4
					TIAM1		NPTX1
					CITED2		PDE1A
					LMO3		HS3ST4
					LRRTM1		GUCY1A1
							TMEM178A
							RASGRP1
							GNG2
							PPP1R1A
							RAB26

## Sheet: V1_temporal
early							late
L1	L2	L3	L4a	L4b	L5	L6	L1	L2	L3	L4a	L4b	L5	L6
	MDGA1	CCN2	TPBG	LOC118144273	CNIH3	SOSTDC1		DRD1	PIP5K1B		PTGS1	MKX	TPD52L1
	ARHGDIB	ABIBP	CDH6	GPR6	GABRA5			LMO7	RFTN1		HTR1B		CAB39L
	THBS1	COL26A1						TESPA1			HOMER3		KRT17
	GRB14										TMEM132E
	MYCN										KCNC4
	KLHL1
	GDF10
	RASGRP2

## Sheet: V2_P16
P16_L1	P16_L2	P16_L3	P16_L4	P16_L5	P16_L6
MSTN	LOC100411069	OCM2	GPR88	ETV1	PPP1R17
NDNF	MDGA1	PENK	CYP26A1	GRP	GUCY1A1
COL6A3	PCDH8	SNCG	PCDH20	FEZF2	NXPH3
SLC13A4	C1QL3	CRYM	LOC118143652	HS3ST2	NEUROD6
PCOLCE	SHISAL2B	RFTN1	HS6ST3	FOXP2	CBLN2
DCN	DACT1	PID1	MBNL2	TOX	SEMA3E
IGF2	ADCYAP1	HS6ST3	FARP1	CPNE4	FARP1
ISLR	DOC2B	IPO5	ARGLU1	CRYM	FAM155A
CCL24	KCTD15	DOCK9	MYO16	NEUROD6	ARHGEF7
SLC6A20	RARRES1	NALCN	TFDP1	FARP1	SLITRK1
FMOD	ADARB2	MYO16	CDC16	MYO16	SPRY2
COL1A2	CXCL14	ARHGEF7	SPRY2	COL4A1	NDFIP2
COLEC12	ENC1	SUGT1	NDFIP2	ARHGEF7	MYCBP2
APOD	CALB2	SUCLA2	MYCBP2	GAS6	LMO7
PRELP	NPY1R	ESD	KCTD12	SPRY2	COMMD6
CXCL14	TMEM158	SHC3	LMO7	RBM26	MZT1
COL18A1	GRB14	GADD45G	PCDH9	KCTD12	PCDH9
COL1A1	ELFN1	DAPK1	KPNA3	LMO7	PCDH17
OLFML3	NEUROD1	LOC100399497	ITM2B	PCDH20	SUGT1
COL3A1	CNR1	ZFAND5	SUCLA2	SUCLA2	FNDC3A
COL12A1	BHLHE40	GDA	GADD45G	ESD	WNK2
RARRES1	GDF10	PIP5K1B	DIRAS2	SPIN1	FAM120A
CEMIP	KCNG1	GOLM1	PRUNE2	SHC3	SHC3
ATP8	KIRREL3	TLE1	RORB	DIRAS2	DIRAS2
COL6A2	LOC103795913	SMARCA2	ZFAND5	HABP4	HABP4
LGALS1	PCSK6	VLDLR	KLF9	PRUNE2	IARS1
LOC100411069	SYNPR	RFX3	PIP5K1B	SH3GL2	TLE4
ID3	CEBPB	SLC1A1	SPTLC1	RRAGA	TMOD1
MXRA8	SHISA9	DMAC1	TLE1	SLC24A2
FRZB	TOX2	ZDHHC21	GNAQ	ELAVL2
MDK	CCKBR	PSIP1	SMARCA2	C1H9orf24
BMP7	SYT17	RRAGA	PTPRD	FAM219A
RELN	KCND2	NDUFB6	SH3GL2	ENHO
ACTB	DAB1	DNAJA1	FOCAD	GALT
KCTD15	CAMK1G	NUDT2	LINGO2	PHF24
ADARB2	LOC103795407	DNAJB5	NDUFB6	STOML2
RFTN2	CRH	TESK1	UBE2R2	RUSC2
WIF1	NNAT	TMEM8B	STOML2	HINT2
MSI2	SLIT3	CLTA	TMEM8B	TMEM8B
ANXA2	EFNB3	LOC100392493	CLTA	CLTA
BST2	LOC118142765	TMOD1	LOC100392493	TOMM5
SPARC	PID1	SEC61B	GABBR2	LOC100392493
MDGA1	HS6ST3	PGAP4	SEC61B	GABBR2
BTBD17	THRB	RAD23B	PLPPR1	GRIN3A
DCAKD	SIAE	TXN	PALM2AKAP2	GNG10
S100A10	MEIS2	GNG10	UGCG	CDC26
ATL3	ASIC2	CDC26	ATP6V1G1	MEGF9
CTSC	KIAA1522	ATP6V1G1	ASTN2	DAB2IP
SLCO2B1	GRIN3A		MEGF9	NDUFA8
NID1	VAT1L		RC3H2	RBM18
LRP10	RBP4		RABGAP1	ARPC5L
ND4L	CPNE2		STRBP
MYBPC1	NEURL1B
SPON1	LOC100396938
MRC2	HPCAL1
SLC7A11	SEZ6L
S100A11	GPR12
SPP1	SLA
FN1	SYTL2
THRB	C10H14orf132
SRGN	ANKRD6
VIM	CADM1
ITGAV	CLDN10
MYH9	WSCD2
PTN	TLE3
COLEC11	DPP10
TXNDC5	THBS1
ITM2A	EGR2
MAN1C1	GRM1
ID1	TMOD1
FSTL1	ID2
RAMP2	KCNIP1
MAGI3	NOP58
LOC118145580	PCSK2
CAMK2B	CDH13
CST6	SST
KPNA6	ST3GAL1
C1QL3	DLX1
DTNA	LRRN2
NBL1	CDC42EP3
CLDN5	THSD7A
MARCHF4	MTSS1
LGALS3BP	DKK3
PTGDS	MN1
IGFBP6	CACHD1
NNAT	IGSF3
CDS1	CACNG3
NPNT	NOXA1
RBP1	SCRIB
TRAM1	MYO1B
DKK3	CHL1
DENND2A	SERPINE2
SYN3	PCDH17
CPNE2	MAD2L2
POFUT2	KBTBD6
PDLIM5	NR2C2
COX1	MXRA8
TIMP1	SULF2
ARPC1B	GRB10
DOC2B	DDN

## Sheet: V2_1m
1m_L1	1m_L2	1m_L3	1m_L4	1m_L5	1m_L6
ND4L	CST6	CUX2	GABRG1	FEZF2	KRT17
ATP8	PCDH8	OCM2	KCNAB1	ETV1	CBLN2
ND3	SYT17	HS6ST3	CYP26B1	HS3ST2	TLE4
COX1	ASIC2	GDA	HS3ST2	CYP26B1	NEUROD6
ND1	CALB2	C1H9orf16	EPOP	CPNE4	NPTX1
LOC103787296	HS6ST3	LOC103795688	RORB	KRT17	RASGRP1
LOC118151249	TMEM158		PRUNE2	CRYM	B3GALT2
ND4	DAPK1		SMARCA2	PCP4L1	GRIK3
ND2	MAPK1		VAV2	SEZ6	NECAB1
COX2	CABIN1		MPPED1	PDE1A	TESC
RELN	SEZ6L			GRIK3	SSTR1
LOC118151245	MN1			RAB26	RPRML
ATP6				GABRA5	SYTL2
COX3				PCP4	C1QL3
PCDH8				DIRAS2	PDE1A
RAMP2				SLC24A2	RAB26
CNR1				ELAVL2	SH3GL2
CALB2				MPPED1	C1H9orf16
CYTB
CRH
RPS29
SLC1A3
TIMP3
RPS27
RPL23A
CLU
MLC1
RPL35
GOLM1
RPL37A

## Sheet: V2_3m
3m_L1	3m_L2	3m_L3	3m_L4	3m_L5	3m_L6
RELN	TMEM158	SNCG	GABRG1	FEZF2	ATP6AP1L
IGF2	SYT17	HS6ST3	CYP26B1	HS3ST2	GUCY1A1
HS6ST3	ADCYAP1	TLE1	FOXP2	MKX	NTNG2
IPO5	OCM2	VAV2	NEUROD6	ETV1	KRT17
FARP1	PDZD2		IGFBP4	NTNG2	NR4A2
EDNRB	C1QL3		HS3ST2	IGF1	NEUROD6
PCDH17	PCDH8		KCNAB1	GABRA5	GRIK3
PCDH8	STUM		CXXC4	CYP26B1	SMIM32
CAB39L	LZTS1		CRH	SLITRK5	ETV1
ITM2B	CALB2		PRKCG	FARP1	ANO3
FAM120A	GPR83		GASK1B	TM9SF2	SEMA3E
SHC3	LOC103795913		TRHDE	NALCN	ISLR2
APBA1	ADRA1D		CPNE4	ANKRD10	CBLN2
NTRK2	SERPINE2		PCDH20	ARHGEF7	RAB26
TLE1	CNR1		EPOP	GAS6	FAM43B
PSAT1	ENC1		CIB2	SPRY2	FARP1
SLC1A1	MYO1B		CACNB2	MZT1	STK24
AK3	CPNE6		VSTM2B	PCDH9	DOCK9
NFIB	HS6ST3		ZBTB16	PCDH20	TM9SF2
SMIM27	TAFA1		CBLN2	PCDH17	FAM155A
UBAP1	GSG1L		TSHZ3	SUCLA2	ARHGEF7
ENHO	KIRREL3		HTR2A	HTR2A	SLITRK1
DNAJB5	SHISA9		RORB	ESD	SPRY2
STOML2	MN1			WNK2	RBM26
TESK1	EGR2			SPIN1	PCDH9
TMOD1	GRIA4			SHC3	PCDH20
SEC61B	DUSP4			DIRAS2	PCDH17
MEGF9	TMOD1			CTSL	CAB39L
LHX2	SLITRK5			HABP4	SPIN1
RPL35	RAP2A			PRUNE2	SHC3
HSPA5	STK24			ZFAND5	DIRAS2
GARNL3	DOCK9			GDA	CTSL
RPL12	NALCN			ISCA1	HABP4
ENG	ARGLU1			GNAQ	AOPEP
ST6GALNAC6	FAM155A			VPS13A	PRUNE2
SET	IRS2			SLC1A1	GDA
NCS1	ARHGEF7			ZDHHC21	APBA1
PRRC2B	MCF2L			SH3GL2	TLE4
RAPGEF1	SLITRK1			SLC24A2	AK3
FAM163B	NDFIP2			ELAVL2	NFIB
VAV2	MYCBP2			DNAJA1	ZDHHC21
NACC2	LMO7			CHMP5	PSIP1
SEC16A	COMMD6			UBAP1	SH3GL2
EGFL7	PCDH17			PHF24	SLC24A2
DIPK1B	SUGT1			VCP	ELAVL2
AJM1	CAB39L			STOML2	PHF24
PHPT1	ITM2B			CLTA	LOC100392493
EDF1	SHC3			RNF38	TMEFF1
PTGDS	DAPK1			TOMM5	SLC44A1
SAMM50	GDA			GABBR2	RAD23B
MPPED1	APBA1			TMEFF1	PALM2AKAP2
CYB5R3	NTRK2			PGAP4	GNG10
	HNRNPK			RAD23B	MEGF9
	TLE1			PALM2AKAP2
	GNAQ			GNG10
	SMARCA2			MEGF9
	SLC1A1			DAB2IP
				RABGAP1
				STRBP
				LHX2
				PSMB7

## Sheet: V2_6m
6m_L1	6m_L2	6m_L3	6m_L4	6m_L5	6m_L6
GFAP	ADRA1D	ADRA1D	GRM2	GABRG1	KRT17
WIF1	PDZD2	SOWAHA	PTGFRN	CYP26B1	FEZF2
LOC118142868	GSG1L	CUX2	LOC108589028	VSTM2B	ATP6AP1L
CALB2	HPCAL1	NPTXR	SNCG	PCDH20	ETV1
DCN	OCM2	NRXN2	ZDHHC21	IGFBP4	GUCY1A1
RAMP2	TMEM158	LOC100410607	LOC100410607	PTGFRN	NEUROD6
LOC100410611	MYO1B	TAFA1	LHFPL6	CIB2	RAB26
LOC103787296	CNTN4	ENC1	ORMDL3	CHRD	RPRM
ATP8	ADCYAP1	HS6ST3	PENK	NEUROD6	GRIK3
RELN	YJEFN3	GRM2	CDC40	RORB	NR4A2
PCDH8	DRD1	TMEM158	KMT5A	PLPP2	TENM3
SPARC	CNR1	TET3	INTS3	LGI4	CRYM
RARRES2	CST6	MFSD12	FAM20C	KCNAB1	RASGRP1
KIT	MN1	PDZD2	IGFBP2	LMO3	B3GALT2
IGFBP3	PCDH8	SYNGAP1	NEFM	CCSAP	PDE1A
DZIP1	LNX1	GSG1L	DEF8	VAV2	RAB3C
HS6ST3	SERPINE2	CA4	TMEM8B	TAFA2	SEZ6
STK24	EGR2	C10H14orf132	MET	NPAS4	C15H3orf14
IRS2	HS6ST3	STUM	KCNH1	DZIP1	IGF1
LAMP1	CEBPB	OCM2	LOC103796371	MBNL2	MAL
TFDP1	SOWAHA	APOC1	BEGAIN	STK24	ID2
SPRY2	ENC1	CBLN4	SLC30A3	FGF14	CRIM1
EDNRB	CALB2	EPOP	EPHA4	ARGLU1	SYNPR
LMO7	CUX2	KIAA1522	PTPRF	IRS2	GPR37
ITM2B	CBLN4	MKNK1	SORBS2	MCF2L	TTC9B
SHC3	ASIC2	SCN3B	SLC7A8	TFDP1	ATP2B4
LOC118153765	CPNE6	PAK5	CYP26B1	SPRY2	DIRAS2
NTRK2	GPR26	CACNA2D1	KIT	NDFIP2	CPNE4
PSAT1	RBP4	ATP8	CACNB2	MYCBP2	NPTX1
NFIB	SLC24A3	KMT5A	DBNDD1	LMO7	MOBP
RRAGA	EGR4	SLC29A4	SLIT1	MZT1	SPARCL1
SMIM27	TESPA1	CAMK2A	SIPA1L2	PCDH9	CLDN11
NDUFB6	C1QL3	BEGAIN	ACTN4	ITM2B	NRSN1
FAM219A	SLC29A4	KLF13	NRXN2	SUCLA2	ANO3
ENHO	PTPRF	GDA	SYT12	HTR2A	TMEM178A
STOML2	TAFA1	MARK2	CRHR1	ESD	KCNMB4
TESK1	STUM	VSTM2L	SPATA2L	WNK2	TF
HINT2	NPTXR	PHYHIP	TSHZ3	FAM120A	TMSB4X
SEC61B	DUSP4	RTN4RL1	ICA1	PRUNE2	RASD1
RAD23B	WIF1	ZBTB18	MAPK11	ZFAND5	KCNA6
DAB2IP	CDH13	CORO2B	HTR2A	KLF9	PLP1
RPL35	RAMP1	YJEFN3	PIP4K2C	ISCA1	ADSS2
RALGPS1	DUSP14	ZDHHC8	WDR13	HNRNPK	SLC35F1
RPL12	PTK2B	RAMP2	ATXN7L3	UBQLN1	SULF2
ST6GALNAC6	JUNB	PTPRF	CALB1	VPS13A	CHL1
ZER1	PPFIA2	CEBPB	TM7SF2	SMARCA2	TCEAL7
SH3GLB2	GDA	RAP2A	PGM2L1	PTPRD	SUSD4
NCS1	PENK	STK24	PDZRN3	RRAGA	JAZF1
PRRC2B	S100A16	DOCK9	ARHGAP35	RPS6	RNASE1
RAPGEF1	CAMK1G	TM9SF2	ADGRA1	SMIM27	PODXL2
NACC2	ERF	FGF14	TIMP3	NDUFB6	PCLO
TMEM250	LOC100396938	ARGLU1	MGAT5B	DNAJA1	LOC100393071
PMPCA	MAPK1	FAM155A	PGAP4	LOC103793565	TUSC3
LOC103795641	GADD45B	ARHGEF7	LOC118151478	CHMP5	CCK
PHPT1	PMEPA1	MCF2L	POLR2A	FAM219A	MAG
PTGDS	JUN	TFDP1	EEF1A2	ENHO	SMIM43
MPPED1	PAK5	SLITRK1	CRTC1	PHF24	SNCA
SCUBE1	SEPTIN11	SPRY2	LRTM2	DNAJB5	LOC100386451
CYB5R3	CACNB2	NDFIP2	TMEM63B	VCP	MMD
SEPTIN3	SEZ6L	LMO7	HS6ST3	STOML2	SMARCD3
SREBF2	PITPNM2	PCDH8	LRRC4B	UNC13B	PRKCE
ACO2	HS6ST1	SUGT1	RABGAP1L	RUSC2	MBP
GRK3	NPTX2	FAM120A	TAFA1	CREB3	EFHD2
SEZ6L	NAV1	SPIN1	GGA1	TMEM8B	GNG2
MN1	CACNG3	SHC3	CABLES1	CLTA	PCP4
RHBDD3	TMEM91	PSAT1	PER2	TOMM5	NKAIN2
UQCR10	PCSK2	GNAQ	AP2B1	GABBR2	OPN3
SELENOM	CNTNAP2	SMARCA2	RORB	SEC61B	MPPED1
MLC1	SCN3B	PTPRD	KCNQ2	PALM2AKAP2	GPR155
TIMP3	SCG2	NFIB	MAFB	TXN	ASAP2
TOM1	CYLD	ZDHHC21	CUX2	ATP6V1G1	ROBO2
TST	GARNL3	ENHO	UBE2D4	BRINP1	ERMN
NPTXR	GPRIN1	DNAJB5	VWA5B2	RAB14	DYNLL1
CBX6	DGKB	UNC13B	LZTS3	DAB2IP	NETO1
DGCR2	DOC2A	TESK1	LUZP1	RC3H2	INSIG1
LOC108593822	CALB1	TMEM8B	ASNS	RABGAP1	ENPP2
CLDN5	SYT16	RNF38	OTOS	PSMB7	GRIA1
SEPTIN5	FKBP1A	GABBR2	DAG1	ARPC5L	ELAVL2
LOC100404227	TAMALIN	TMEFF1	RAB40C	PPP6C	ARHGDIG
PPP6R2	PTPRR	RAD23B	PITPNB	HSPA5	SYNGR3
LOC108588244	CHST1	PALM2AKAP2	DGKZ	STXBP1	CCER2
SBF1	PLPPR4	MEGF9	NEFL	CDK9	CYRIA
SHANK3	CTNNA2	RABGAP1	RASGEF1B	SLC25A25	GSN
TLN2	NPAS1	PSMB7	RALGAPB	PTGES2	INF2
TPM1	PRKCG	RPL35	SMG7	COQ4	CPNE5
DPP8	SST	PPP6C	SNPH	SPTAN1	SCG3
HACD3	THRB	RALGPS1	ELMO2	SH3GLB2	TESC
SMAD3	MEIS3	GARNL3	CIT	IER5L	C1QL3
CORO2B	ATP2B1	CDK9	ND5	NCS1	RIC8A
RPLP1	SYNPR	ST6GALNAC6	RIMS3	FAM163B	SMAP1
RCN2	PDE1B	DPM2	RELL2	WDR5	TUBB2A
ACSBG1	CA10	SLC25A25	DGKQ	LOC103795688	ELAVL4
DNAJA4	PRKAR2B	DNM1	ACP2	MRPS2	PFKP
SERF2	FBLN7	SH3GLB2	POLR2E	NACC2	CPEB3
B2M	C19H1orf115	PTPA	APC	LOC103795641	RTN1
GATM	NOVA2	IER5L	PIK3R2	EDF1	SH3BGRL3
BLOC1S6	DLK2	C1H9orf78	KHSRP	FBXW5	ACAT2
SCG3	VSTM2L	PRRC2B	GRIN1	PAXX	DZIP1
MAPK6	HRH2	RAPGEF1	SLC39A10	DPP7	STK24
CCPG1	MAPRE2	VAV2	PEDS1	SSNA1	DOCK9

## Sheet: V2_common
L1	L2	L3	L4	L5	L6
RELN	PCDH8	HS6ST3	RORB		NEUROD6
	CALB2
	TMEM158
	HS6ST3
	MN1

[truncated: 16 more sheets: V2_temporal, A3_P16, A3_1m, A3_3m, A3_6m, A3_common, A3_temporal, AuA1_P16, AuA1_1m, AuA1_3m, AuA1_6m, AuA1_common, AuA1_temporal, PFC permanent area marker, temporal genes in PFC, Sheet1]
