# Supplementary material for: Molecular architecture of primate specific neural circuit formation
Source: Research Square preprint supplement (doi:10.21203/rs.3.rs-4082064/v1), 2024-03-22
Supplement: Supplementary file 5 [file ea991f4475cc1e97080bf03c.xlsx]

## Sheet: sex difference gene (summary)
male													female
AuA1			A3			Visual			PFC				AuA1			A3			Visual			PFC
1 month	3 month	6 month	1 month	3 month	6 month	1 month	3 month	6 month	1 month	3 month	6 month		1 month	3 month	6 month	1 month	3 month	6 month	1 month	3 month	6 month	1 month	3 month	6 month
LOC118150934	PLP1	PLP1	PCSK1N	LOC118150934	LOC118150934	LOC118150934	LOC118150934	LOC118150934	PLP1	LOC118150934	LOC118150934		CD99	SYN1	TMSB4X	EIF2S3	TIMP1	EOLA1	NDUFA1	RPS4X	LOC100390732	RPS4X	EOLA1	TMSB15B
EOLA1	LOC118150934	PCSK1N	LOC118150934	PLP1	PLP1	TMSB4X		EOLA2	LOC118150934	PLP1	PLP1		KLHL13	BEX2	CNKSR2	EOLA2	CD99L2	TMSB4X	TIMP1		BEX3	EOLA2	RPS4X	UBA1
PGK1	GPM6B	LOC118150934	SYN1	TMSB4X	EOLA2	LOC118150930		LOC118150930	EOLA1	LOC118150930	SLITRK4		GRIPAP1	RPS4X	BEX1	LOC100407306	PDZD4		BEX2		BEX4	TMSB4X	TMSB4X	SLC25A5
GDI1		EOLA2	PDZD4		IGSF1	SYP			IGSF1	PGK1	ATRX		IGSF1	TMSB4X	RPS4X	TMSB15A	SYP		RPS4X		BEX5			AKAP17A
SLC25A6		PGK1	CDK16		MID1IP1				LOC118150930	RAB33A	EOLA2		SAT1		TMSB15B	LOC100390732					BEX1			LOC100407306
SYN1		MID1IP1	SYP						ZDHHC9	TCEAL2	PCDH11X		CUL4B		PGRMC1	TMSB4X					RPS4X			RPL10
BEX2			SLC25A6						PGRMC1	LOC118142857	LOC118150930		NAP1L3		EOLA1	UBQLN2					TMSB15B			LOC108589966
LOC118150930			EOLA1						PLXNB3	NDUFA1	ATP6AP2		ARSL			LOC100388088					EOLA1			TSPYL2
CDK16			NDUFB11							ATP6AP1	USP9X		LOC100390732			VBP1								NDUFB11
			IDH3G							GPM6B	NAP1L3		TMSB15A			DDX3X								FLNA
			FAM50A								UBQLN2		EOLA2			BEX5								SLC25A6
			BCAP31								NAP1L2		TMSB4X			TCEAL8								CDK16
			NDUFA1										PLP1			GPM6B								RPS4X
			UBA1													FHL1								PCSK1N
			IQSEC2													OGT								EOLA1
			USP11													EIF1AX
			ATP6AP1													MORF4L2
			NAA10													ATP6AP2
			FLNA													PGRMC1
			RBM10													NAP1L3
			SLC6A8													LOC108589786
			OTUD5													RPS4X
			SHROOM2													PLP1
			L1CAM
			RTL8C
			GDI1

## Sheet: comparison (expID)
Sex comparison(Exp ID)				Sex comparison(Exp ID)				Sex comparison(Exp ID)				Sex comparison(Exp ID)
AuA1	male	female		A3	male	female		Visual	male	female		PFC	male	female
1 motnh	3688	3705		1 motnh	3686	3701		1 motnh	3677	3675		1 motnh	4238	4491
3 month	3786	3749		3 month	3783	3788		3 month	3707	3709		3 month	4419	4122
6 month	3819	3808		6 month	3820	3806		6 month	3867	3868		6 month	4261	4257

## Sheet: PFC_1m_male_vs_female
	gene	p_val	avg_log2FC	pct.1(male)	pct.2(female)	p_val_adj
PLP1	PLP1	0	3.21619	0.834	0.497	0
LOC118150934	LOC118150934	0	1.26253	0.682	0.015	0
EOLA1	EOLA1	1.56e-270	0.490659	0.327	0.001	3.13e-266
IGSF1	IGSF1	4.54e-59	0.430699	0.424	0.258	9.07e-55
LOC118150930	LOC118150930	1.27e-171	0.342948	0.223	0.002	2.55e-167
ZDHHC9	ZDHHC9	5.51e-27	0.328203	0.496	0.399	1.1e-22
PGRMC1	PGRMC1	6.65e-86	0.294331	0.999	0.994	1.33e-81
PLXNB3	PLXNB3	4.8e-29	0.274341	0.27	0.168	9.59e-25
RPS4X	RPS4X	9.7e-227	-0.576722	0.916	0.972	1.94e-222
EOLA2	EOLA2	0	-0.595274	0	0.391	0
TMSB4X	TMSB4X	0	-0.79578	0.695	0.911	0

## Sheet: PFC_3m_male_vs_female
	gene	p_val	avg_log2FC	pct.1(male)	pct.2(female)	p_val_adj
LOC118150934	LOC118150934	0	1.74569	0.9	0.078	0
PLP1	PLP1	0.767446	0.871614	0.857	0.91	1
LOC118150930	LOC118150930	7.81e-277	0.450474	0.303	0.004	1.62e-272
PGK1	PGK1	5.25e-111	0.38827	0.915	0.817	1.09e-106
RAB33A	RAB33A	4.6e-62	0.310869	0.664	0.503	9.53e-58
TCEAL2	TCEAL2	2.96e-73	0.291573	0.955	0.9	6.13e-69
LOC118142857	LOC118142857	9.23e-177	0.291436	0.201	0.002	1.91e-172
NDUFA1	NDUFA1	2.32e-168	0.288164	1	1	4.8e-164
ATP6AP1	ATP6AP1	1.75e-117	0.274226	0.999	0.998	3.62e-113
GPM6B	GPM6B	4.59e-110	0.256087	1	1	9.51e-106
EOLA1	EOLA1	1.53e-154	-0.293364	0.001	0.192	3.17e-150
RPS4X	RPS4X	3.17e-227	-0.440482	0.999	1	6.57e-223
TMSB4X	TMSB4X	0	-0.898348	0.721	0.955	0

## Sheet: PFC_6m_male_vs_female
	gene	p_val	avg_log2FC	pct.1(male)	pct.2(female)	p_val_adj
LOC118150934	LOC118150934	0	1.14395	0.643	0.001	0
PLP1	PLP1	1.31e-79	0.816947	0.883	0.724	2.62e-75
SLITRK4	SLITRK4	2.13e-169	0.608164	0.768	0.504	4.28e-165
ATRX	ATRX	9.23e-96	0.416439	0.887	0.763	1.85e-91
EOLA2	EOLA2	5.99e-167	0.342943	0.223	0	1.2e-162
PCDH11X	PCDH11X	3.25e-47	0.340294	0.71	0.571	6.52e-43
LOC118150930	LOC118150930	1.26e-154	0.324734	0.207	0	2.53e-150
ATP6AP2	ATP6AP2	6e-69	0.273424	0.996	0.987	1.2e-64
USP9X	USP9X	1.99e-43	0.272519	0.849	0.76	3.98e-39
NAP1L3	NAP1L3	4.56e-47	0.272058	0.959	0.919	9.15e-43
UBQLN2	UBQLN2	2.44e-43	0.260505	0.927	0.868	4.9e-39
NAP1L2	NAP1L2	8.3e-36	0.257899	0.897	0.841	1.67e-31
TMSB15B	TMSB15B	4.63e-38	-0.254627	0.955	0.97	9.29e-34
UBA1	UBA1	8.62e-50	-0.257175	0.871	0.925	1.73e-45
SLC25A5	SLC25A5	1.88e-45	-0.26351	0.419	0.586	3.78e-41
AKAP17A	AKAP17A	6.51e-69	-0.268659	0.131	0.313	1.3e-64
LOC100407306	LOC100407306	1.25e-40	-0.269279	0.562	0.703	2.5e-36
RPL10	RPL10	9.48e-68	-0.269306	0.969	0.992	1.9e-63
LOC108589966	LOC108589966	2.3e-52	-0.273743	0.29	0.472	4.6e-48
TSPYL2	TSPYL2	4.26e-48	-0.277976	0.614	0.749	8.54e-44
NDUFB11	NDUFB11	7.79e-70	-0.303996	0.888	0.946	1.56e-65
FLNA	FLNA	6.19e-61	-0.307248	0.357	0.558	1.24e-56
SLC25A6	SLC25A6	3.69e-97	-0.307925	0.987	0.996	7.4e-93
CDK16	CDK16	2.66e-98	-0.39642	0.765	0.892	5.33e-94
RPS4X	RPS4X	7.14e-103	-0.400345	0.798	0.909	1.43e-98
PCSK1N	PCSK1N	3.05e-231	-0.52461	0.974	0.997	6.11e-227
EOLA1	EOLA1	6.02e-305	-0.54834	0.003	0.368	1.21e-300

## Sheet: Visual_1m_male_vs_female
	gene	p_val	avg_log2FC	pct.1(male)	pct.2(female)	p_val_adj
LOC118150934	LOC118150934	0	1.44208	0.798	0.011	0
TMSB4X	TMSB4X	0	0.750821	0.997	0.966	0
LOC118150930	LOC118150930	4.41e-208	0.394982	0.267	0.003	8.9e-204
SYP	SYP	3.09e-88	0.367758	0.986	0.967	6.24e-84
NDUFA1	NDUFA1	3.14e-95	-0.258154	1	1	6.34e-91
TIMP1	TIMP1	3.05e-22	-0.276037	0.397	0.504	6.16e-18
BEX2	BEX2	1.84e-73	-0.284476	0.998	0.999	3.72e-69
RPS4X	RPS4X	1.94e-154	-0.452093	0.979	0.995	3.91e-150

## Sheet: Visual_3m_male_vs_female
	gene	p_val	avg_log2FC	pct.1(male)	pct.2(female)	p_val_adj
LOC118150934	LOC118150934	1.12e-201	0.646548	0.37	0.005	1.99e-197
RPS4X	RPS4X	1.51e-31	-0.284173	0.795	0.867	2.68e-27

## Sheet: Visual_6m_male_vs_female
	gene	p_val	avg_log2FC	pct.1(male)	pct.2(female)	p_val_adj
LOC118150934	LOC118150934	0	1.06808	0.554	0	0
EOLA2	EOLA2	9.34e-243	0.567392	0.346	0	1.78e-238
LOC118150930	LOC118150930	9.84e-130	0.315059	0.197	0	1.88e-125
LOC100390732	LOC100390732	1.07e-77	-0.258528	1	0.999	2.04e-73
BEX3	BEX3	1.57e-53	-0.260432	0.991	0.99	2.98e-49
BEX4	BEX4	1.01e-53	-0.27428	0.98	0.992	1.92e-49
BEX5	BEX5	1.21e-47	-0.278392	0.928	0.959	2.3e-43
BEX1	BEX1	6.64e-112	-0.323861	0.999	1	1.27e-107
RPS4X	RPS4X	1.5e-80	-0.326114	0.969	0.982	2.85e-76
TMSB15B	TMSB15B	2.48e-70	-0.361783	0.898	0.956	4.72e-66
EOLA1	EOLA1	0	-0.734879	0	0.464	0

## Sheet: A3_1m_male_vs_female
	gene	p_val	avg_log2FC	pct.1(male)	pct.2(female)	p_val_adj
PCSK1N	PCSK1N	0	1.89493	0.99	0.53	0
LOC118150934	LOC118150934	0	1.10578	0.707	0.007	0
SYN1	SYN1	5.06e-243	0.785433	0.943	0.72	9.86e-239
PDZD4	PDZD4	1.24e-257	0.778965	0.743	0.248	2.42e-253
CDK16	CDK16	4.38e-161	0.61466	0.787	0.421	8.54e-157
SYP	SYP	2.81e-172	0.590198	0.97	0.926	5.48e-168
SLC25A6	SLC25A6	2.52e-191	0.579191	0.985	0.914	4.91e-187
EOLA1	EOLA1	1.29e-239	0.464788	0.337	0.002	2.52e-235
NDUFB11	NDUFB11	2.47e-94	0.428998	0.934	0.857	4.82e-90
IDH3G	IDH3G	8.71e-91	0.407366	0.575	0.277	1.7e-86
FAM50A	FAM50A	9.68e-104	0.386618	0.43	0.146	1.89e-99
BCAP31	BCAP31	9.42e-75	0.381035	0.619	0.342	1.84e-70
NDUFA1	NDUFA1	1.11e-104	0.378214	0.997	0.983	2.15e-100
UBA1	UBA1	5.06e-72	0.355386	0.649	0.369	9.86e-68
IQSEC2	IQSEC2	6.78e-72	0.335902	0.492	0.232	1.32e-67
USP11	USP11	1.16e-55	0.330205	0.794	0.589	2.27e-51
ATP6AP1	ATP6AP1	3.67e-58	0.325557	0.909	0.825	7.16e-54
NAA10	NAA10	3.05e-69	0.310238	0.444	0.199	5.94e-65
FLNA	FLNA	1.33e-52	0.301517	0.35	0.155	2.59e-48
RBM10	RBM10	1.38e-70	0.30071	0.421	0.178	2.68e-66
SLC6A8	SLC6A8	1.2e-66	0.300392	0.437	0.194	2.33e-62
OTUD5	OTUD5	4.94e-63	0.291156	0.402	0.176	9.63e-59
SHROOM2	SHROOM2	1.38e-50	0.280769	0.488	0.267	2.68e-46
L1CAM	L1CAM	4.09e-50	0.276697	0.467	0.253	7.98e-46
RTL8C	RTL8C	7.22e-78	0.268019	0.28	0.076	1.41e-73
GDI1	GDI1	7.84e-44	0.257626	0.971	0.947	1.53e-39
EIF2S3	EIF2S3	8.08e-19	-0.250172	0.246	0.351	1.57e-14
EOLA2	EOLA2	7.74e-71	-0.256549	0.001	0.166	1.51e-66
LOC100407306	LOC100407306	1.2e-22	-0.257379	0.739	0.803	2.34e-18
TMSB15A	TMSB15A	2.11e-16	-0.263763	0.371	0.452	4.11e-12
LOC100390732	LOC100390732	6.16e-55	-0.268487	0.997	1	1.2e-50
TMSB4X	TMSB4X	3.48e-43	-0.269723	0.994	0.999	6.79e-39
UBQLN2	UBQLN2	1.47e-17	-0.285797	0.493	0.552	2.86e-13
LOC100388088	LOC100388088	1.27e-29	-0.286593	0.866	0.934	2.48e-25
VBP1	VBP1	1.46e-15	-0.287739	0.457	0.514	2.85e-11
DDX3X	DDX3X	2.5e-22	-0.289032	0.56	0.64	4.88e-18
BEX5	BEX5	6.73e-32	-0.302253	0.849	0.922	1.31e-27
TCEAL8	TCEAL8	3.93e-22	-0.305635	0.493	0.571	7.67e-18
GPM6B	GPM6B	1.64e-55	-0.307272	0.994	0.997	3.2e-51
FHL1	FHL1	8.27e-29	-0.320145	0.583	0.665	1.61e-24
OGT	OGT	5.11e-29	-0.33516	0.579	0.664	9.96e-25
EIF1AX	EIF1AX	9.21e-37	-0.343209	0.667	0.766	1.8e-32
MORF4L2	MORF4L2	1.08e-59	-0.371217	0.907	0.97	2.11e-55
ATP6AP2	ATP6AP2	1.02e-64	-0.418584	0.86	0.953	1.98e-60
PGRMC1	PGRMC1	5.48e-104	-0.514765	0.85	0.958	1.07e-99
NAP1L3	NAP1L3	3.29e-98	-0.540954	0.673	0.865	6.41e-94
LOC108589786	LOC108589786	8.31e-96	-0.571834	0.372	0.629	1.62e-91
RPS4X	RPS4X	1.38e-199	-0.728837	0.806	0.97	2.69e-195
PLP1	PLP1	2.51e-155	-2.04142	0.631	0.974	4.9e-151

## Sheet: A3_3m_male_vs_female
	gene	p_val	avg_log2FC	pct.1(male)	pct.2(female)	p_val_adj
LOC118150934	LOC118150934	0	0.881753	0.487	0.003	0
PLP1	PLP1	6.71e-83	0.713974	0.971	0.874	1.26e-78
TMSB4X	TMSB4X	1.54e-49	0.373458	0.549	0.409	2.89e-45
TIMP1	TIMP1	2.03e-42	-0.266591	0.189	0.35	3.79e-38
CD99L2	CD99L2	2.39e-57	-0.296363	0.374	0.581	4.47e-53
PDZD4	PDZD4	1.76e-47	-0.301699	0.468	0.641	3.29e-43
SYP	SYP	6.63e-121	-0.54314	0.94	0.959	1.24e-116

[truncated: 4 more sheets: A3_6m_male_vs_female, AuA1_1m_male_vs_female, AuA1_3m_male_vs_female, AuA1_6m_male_vs_female]
